# Supplementary material
Source: PubMed Central journal article supplement (PMC4042833)
Supplement: NIHMS542100-supplement-01.pdf [file NIHMS542100-supplement-01.pdf]

**Table S1. Top 800<sup>a</sup> bioweight genes**

| Probe        | R/P <sup>b</sup> | Bioweight | Gene          | Description                                                                                                                    | Accession |
|--------------|------------------|-----------|---------------|--------------------------------------------------------------------------------------------------------------------------------|-----------|
| 1452790_x_at | R                | 4.068     | Ndufa3        | NADH dehydrogenase (ubiquinone) 1 alpha subcomplex 3                                                                           | AV048277  |
| 1422586_at   | R                | 3.041     | Ecel1         | endothelin converting enzyme-like 1                                                                                            | NM_021306 |
| 1448685_at   | R                | 2.975     | 2900010M23Rik | RIKEN cDNA 2900010M23 gene                                                                                                     | NM_026063 |
| 1418300_a_at | R                | 2.861     | Mknk2         | MAP kinase-interacting serine/threonine kinase 2                                                                               | NM_021462 |
| 1456109_a_at | R                | 2.860     | Mrps15        | mitochondrial ribosomal protein S15                                                                                            | BB314055  |
| 1450795_at   | R                | 2.837     | Lhb           | luteinizing hormone beta                                                                                                       | NM_008497 |
| 1416134_at   | R                | 2.792     | Aplp1         | amyloid beta (A4) precursor-like protein 1                                                                                     | NM_007467 |
| 1418255_s_at | R                | 2.695     | Srf           | serum response factor                                                                                                          | BI662291  |
| 1437164_x_at | R                | 2.657     | Atp5o         | ATP synthase, H+ transporting, mitochondrial F1 complex, O subunit                                                             | AV066932  |
| 1428464_at   | R                | 2.585     | Ndufa3        | NADH dehydrogenase (ubiquinone) 1 alpha subcomplex, 3                                                                          | AV048277  |
| 1436064_x_at | R                | 2.425     | Rps24         | ribosomal protein S24                                                                                                          | AV004977  |
| 1455950_x_at | R                | 2.404     | Rpl35         | RIKEN cDNA 1700123D08 gene                                                                                                     | AV172221  |
| 1422532_at   | R                | 2.396     | Xpc           | xeroderma pigmentosum, complementation group C                                                                                 | NM_009531 |
| 1460711_at   | R                | 2.388     | 9930116P15Rik | ES cells cDNA, RIKEN clone:C330022M23                                                                                          | BG071611  |
| 1451307_at   | R                | 2.355     | 1110006111Rik | RIKEN cDNA 1110006111 gene                                                                                                     | BC027021  |
| 1437621_x_at | R                | 2.308     |               | AV216768 RIKEN clone 2410167D16 3' similar to L21027                                                                           | AV216768  |
| 1423948_at   | R                | 2.242     | Bag2          | Bcl2-associated athanogene 2                                                                                                   | BC016230  |
| 1433603_at   | R                | 2.210     | BC059730      | CDNA clone IMAGE:6772417, with apparent retained intron                                                                        | C88200    |
| 1422614_s_at | R                | 2.192     | Bloc1s1       | GCN5 general control of amino acid synthesis-like 1 (yeast)                                                                    | NM_015740 |
| 1416367_at   | R                | 2.175     | 1110001J03Rik | RIKEN cDNA 1110001J03 gene                                                                                                     | NM_025363 |
| 1417657_s_at | R                | 2.121     | Zrf2          | zuotin related factor 2                                                                                                        | BG067003  |
| 1455106_a_at | R                | 2.120     | Ckb           | creatine kinase, brain                                                                                                         | BG967663  |
| 1416584_at   | R                | 2.109     | Man2b2        | mannosidase 2, alpha B2                                                                                                        | NM_008550 |
| 1416494_at   | R                | 2.091     | Ndufs5        | NADH dehydrogenase (ubiquinone) Fe-S protein 5                                                                                 | NM_134104 |
| 1418256_at   | R                | 2.043     | Srf           | serum response factor                                                                                                          | BI662291  |
| 1427294_a_at | R                | 2.036     | 1810073N04Rik | RIKEN cDNA 1810073N04 gene                                                                                                     | BB406585  |
| 1417348_at   | R                | 2.034     | 2310039H08Rik | male enhanced antigen 1                                                                                                        | NM_025966 |
| 1418910_at   | R                | 2.011     | Bmp7          | bone morphogenetic protein 7                                                                                                   | NM_007557 |
| 1452367_at   | R                | 2.008     | Coro2a        | tripartite motif-containing 14                                                                                                 | AI316747  |
| 1454674_at   | R                | 1.994     | Fez1          | fasciculation and elongation protein zeta 1 (zygin I)                                                                          | AU067669  |
| 1428494_a_at | R                | 1.985     | Polr2i        | polymerase (RNA) II (DNA directed) polypeptide I                                                                               | BB284638  |
| 1428869_at   | R                | 1.961     | Nolc1         | nucleolar and coiled-body phosphoprotein 1                                                                                     | BM213850  |
| 1419292_at   | R                | 1.938     | 9530081K03Rik | RIKEN cDNA 9530081K03 gene                                                                                                     | NM_030127 |
| 1424871_s_at | R                | 1.930     | 1500031H01Rik | cDNA sequence BC013706                                                                                                         | BC013706  |
| 1416713_at   | R                | 1.917     | 2700055K07Rik | RIKEN cDNA 2700055K07 gene                                                                                                     | NM_026481 |
| 1434646_s_at | R                | 1.916     | Sap18         | Sin3-associated polypeptide 18                                                                                                 | AV023865  |
| 1423857_at   | R                | 1.914     | Mrpl30        | mitochondrial ribosomal protein L30                                                                                            | BC004614  |
| 1418448_at   | R                | 1.914     | Rras          | Harvey rat sarcoma oncogene, subgroup R                                                                                        | NM_009101 |
| 1424018_at   | R                | 1.910     | Hint1         | histidine triad nucleotide binding protein 1                                                                                   | U60001    |
| 1437450_x_at | R                | 1.877     | 2700060E02Rik | RIKEN cDNA 2700060E02 gene                                                                                                     | AV167877  |
| 1425248_a_at | R                | 1.875     | Tyro3         | TYRO3 protein tyrosine kinase 3                                                                                                | AB000828  |
| 1424002_at   | R                | 1.874     | Pdcl3         | phosducin-like 3                                                                                                               | BC005601  |
| 1450466_at   | R                | 1.867     |               | Adult male corpora quadrigemina cDNA, RIKEN full-length enriched library, clone:B230310J22 product:unclassifiable, full insert | BI739719  |
| 1448917_at   | R                | 1.865     | Thrap6        | thyroid hormone receptor associated protein 6                                                                                  | NM_027212 |
| 1423676_at   | R                | 1.861     | Atp5h         | ATP synthase, H+ transporting, mitochondrial F0 complex, subunit d                                                             | AF354051  |
| 1416495_s_at | R                | 1.849     | Ndufs5        | NADH dehydrogenase (ubiquinone) Fe-S protein 5                                                                                 | NM_134104 |
| 1428076_s_at | R                | 1.843     | Ndufb4        | NADH dehydrogenase (ubiquinone) 1 beta subcomplex 4                                                                            | BG968046  |

|              |   |       |               |                                                                                                                                                                                                      |           |
|--------------|---|-------|---------------|------------------------------------------------------------------------------------------------------------------------------------------------------------------------------------------------------|-----------|
| 1420368_at   | R | 1.830 | Denr          | Mus musculus ES cells cDNA, RIKEN full-length enriched library, clone:2410004J11:Density-Regulated Protein, full insert sequence.                                                                    | AK010394  |
| 1418709_at   | R | 1.785 | Cox7a1        | cytochrome c oxidase, subunit VIIa 1                                                                                                                                                                 | AF037370  |
| 1418273_a_at | R | 1.770 | Rpl30         | ribosomal protein L30                                                                                                                                                                                | NM_009083 |
| 1416859_at   | R | 1.766 | Fkbp3         | FK506 binding protein 3                                                                                                                                                                              | NM_013902 |
| 1424172_at   | R | 1.763 | Hagh          | hydroxyacyl glutathione hydrolase                                                                                                                                                                    | BC004749  |
| 1437133_x_at | R | 1.751 | Akr1b3        | 2 days pregnant female oviduct cDNA, RIKEN full-length enriched library, clone:E230024H01:unknown EST, full insert sequence                                                                          | AV127085  |
| 1424391_at   | R | 1.750 | Nrd1          | nardilysin, N-arginine dibasic convertase, NRD convertase 1                                                                                                                                          | BC026832  |
| 1424830_at   | R | 1.739 | Ccnk          | cyclin K                                                                                                                                                                                             | BC027297  |
| 1434396_a_at | R | 1.739 | Myl6          | myosin light chain, alkali, nonmuscle                                                                                                                                                                | AU017189  |
| 1435755_at   | R | 1.734 | 1110001A16Rik | RIKEN cDNA 1110001A16 gene                                                                                                                                                                           | BB609468  |
| 1448794_s_at | R | 1.730 | Zrf2          | zuotin related factor 2                                                                                                                                                                              | BG067003  |
| 1460724_at   | R | 1.729 | Ap2a1         | adaptor protein complex AP-2, alpha 1 subunit                                                                                                                                                        | NM_007458 |
| 1416337_at   | R | 1.719 | Uqcrb         | ubiquinol-cytochrome c reductase binding protein                                                                                                                                                     | NM_026219 |
| 1422480_at   | R | 1.710 | Snx3          | sorting nexin 3                                                                                                                                                                                      | NM_017472 |
| 1460581_a_at | R | 1.701 | Rpl13         | Transcribed sequence with strong similarity to protein ref:NP_150254.1 (H.sapiens) ribosomal protein L13; 60S ribosomal protein L13; breast basic conserved protein 1 [Homo sapiens]                 | AI506565  |
| 1423090_x_at | R | 1.698 | Sec61g        | Transcribed sequence with strong similarity to protein sp:P38384 (H.sapiens) S61G_HUMAN Protein transport protein SEC61 gamma subunit                                                                | AV216331  |
| 1421260_a_at | R | 1.697 | Srm           | spermidine synthase                                                                                                                                                                                  | NM_009272 |
| 1434053_x_at | R | 1.681 | Atp5k         | ATP synthase, H+ transporting mitochondrial F1F0 complex, subunit e                                                                                                                                  | AV216686  |
| 1425300_at   | R | 1.670 | BC021917      | cDNA sequence BC021917                                                                                                                                                                               | BC021917  |
| 1439389_s_at | R | 1.659 | Myadm         | BB500055 RIKEN full-length enriched, 0 day neonate kidney Mus musculus cDNA clone D630024J02 3' similar to AJ001616 Mus musculus mRNA for myeloid associated differentiation protein, mRNA sequence. | BB500055  |
| 1417394_at   | R | 1.658 | Klf4          | Kruppel-like factor 4 (gut)                                                                                                                                                                          | BG069413  |
| 1438563_s_at | R | 1.650 | Mrps24        | AV069725 Mus musculus small intestine C57BL/6J adult Mus musculus cDNA clone 2010312F15, mRNA sequence.                                                                                              | AV069725  |
| 1449029_at   | R | 1.648 | Mknk2         | MAP kinase-interacting serine/threonine kinase 2                                                                                                                                                     | NM_021462 |
| 1416098_at   | R | 1.648 | Syngn3        | synaptogyrin 3                                                                                                                                                                                       | NM_011522 |
| 1448440_x_at | R | 1.631 | D17Wsu104e    | interleukin 25                                                                                                                                                                                       | NM_080837 |
| 1427943_at   | R | 1.629 | Acyp2         | acylphosphatase 2, muscle type                                                                                                                                                                       | BI730288  |
| 1448319_at   | R | 1.628 | Akr1b3        | aldo-keto reductase family 1, member B3 (aldose reductase)                                                                                                                                           | NM_009658 |
| 1422608_at   | R | 1.625 | Arpp19        | cAMP-regulated phosphoprotein 19                                                                                                                                                                     | BE648432  |
| 1452184_at   | R | 1.620 | Ndubf9        | NADH dehydrogenase (ubiquinone) 1 beta subcomplex, 9                                                                                                                                                 | W29413    |
| 1456691_s_at | R | 1.614 | Srd5a2l       | BB825787 RIKEN full-length enriched, mammary gland RCB-0526 Jyg-MC(A) cDNA Mus musculus cDNA clone G830039K08 3', mRNA                                                                               | BB825787  |
| 1418226_at   | R | 1.607 | Orc2l         | origin recognition complex, subunit 2-like (S. cerevisiae)                                                                                                                                           | BB830976  |
| 1434442_at   | R | 1.607 | D5Erttd593e   | DNA segment, Chr 5, ERATO Doi 593, expressed                                                                                                                                                         | BB667844  |
| 1423610_at   | R | 1.605 | Metap2        | Adult retina cDNA, RIKEN full-length enriched library, clone:A930035J23 product:unknown EST, full insert sequence                                                                                    | BG086961  |
| 1416673_at   | R | 1.600 | Bace2         | beta-site APP-cleaving enzyme 2                                                                                                                                                                      | NM_019517 |
| 1416765_s_at | R | 1.598 | Magmas        | mitochondria-associated protein involved in granulocyte-macrophage colony-stimulating factor signal transduction                                                                                     | NM_025571 |
| 1417432_a_at | R | 1.596 | Gnb1          | guanine nucleotide binding protein, beta 1                                                                                                                                                           | NM_008142 |
| 1418942_at   | R | 1.591 | Ccdc2         | coiled-coil domain containing 2                                                                                                                                                                      | NM_026319 |
| 1435041_at   | R | 1.582 | Myl6          | myosin light chain, alkali, nonmuscle                                                                                                                                                                | BI108818  |

|              |   |       |               |                                                                                                                             |           |
|--------------|---|-------|---------------|-----------------------------------------------------------------------------------------------------------------------------|-----------|
| 1426659_a_at | R | 1.571 | BC029892      | Similar to 60S ribosomal protein L23a (LOC268449), mRNA                                                                     | BF178310  |
| 1452357_at   | R | 1.569 | Sept5         | septin 5                                                                                                                    | AF033350  |
| 1456471_x_at | R | 1.569 | Phgdh         | Transcribed sequence with strong similarity to protein sp:Q61753 (M.musculus) SERA_MOUSE D-3-phosphoglycerate dehydrogenase | BB204486  |
| 1448483_a_at | R | 1.569 | Ndufb2        | NADH dehydrogenase (ubiquinone) 1 beta subcomplex, 2                                                                        | NM_026612 |
| 1453362_x_at | R | 1.567 | Rps24         | ribosomal protein S24                                                                                                       | AK008386  |
| 1448050_s_at | R | 1.566 | Map4k4        | mitogen-activated protein kinase kinase kinase kinase 4                                                                     | BF450398  |
| 1422507_at   | R | 1.552 | Cstb          | cystatin B                                                                                                                  | NM_007793 |
| 1427939_s_at | R | 1.551 | Mycbp         | c-myc binding protein                                                                                                       | BB046347  |
| 1436510_a_at | R | 1.547 | Lrrfip2       | leucine rich repeat (in FLII) interacting protein 2                                                                         | BE456782  |
| 1427913_at   | R | 1.546 | Rwdd1         | RWD domain containing 1                                                                                                     | AK003262  |
| 1417389_at   | R | 1.545 | Gpc1          | glypican 1                                                                                                                  | NM_016696 |
| 1448353_x_at | R | 1.534 | Rpn1          | ribophorin I                                                                                                                | NM_133933 |
| 1426657_s_at | R | 1.522 | Phgdh         | 3-phosphoglycerate dehydrogenase                                                                                            | L21027    |
| 1426964_at   | R | 1.521 | 3110003A17Rik | RIKEN cDNA 3110003A17 gene                                                                                                  | AK013984  |
| 1415761_at   | R | 1.521 | Mrpl52        | mitochondrial ribosomal protein L52                                                                                         | AV021593  |
| 1435857_s_at | R | 1.520 | Aplp1         | amyloid beta (A4) precursor-like protein 1                                                                                  | AI848048  |
| 1416850_s_at | R | 1.519 | D10Ert214e    | DNA segment, Chr 10, ERATO Doi 214, expressed                                                                               | NM_134007 |
| 1448439_at   | R | 1.515 | D17Wsu104e    | interleukin 25                                                                                                              | NM_080837 |
| 1438001_x_at | R | 1.510 | Dp1           | deleted in polyposis 1                                                                                                      | AV054377  |
| 1422794_at   | R | 1.503 | Cul3          | cullin 3                                                                                                                    | AV273804  |
| 1428340_s_at | R | 1.503 | 1110012E06Rik | RIKEN cDNA 1110012E06 gene                                                                                                  | BM944122  |
| 1449482_at   | R | 1.498 | Hist3h2ba     | histone 3, H2ba                                                                                                             | NM_030082 |
| 1448784_at   | R | 1.496 | Taf10         | TAF10 RNA polymerase II, TATA box binding protein (TBP)-associated factor                                                   | NM_020024 |
| 1452584_at   | R | 1.495 | 1500032L24Rik | RIKEN cDNA 1500032L24 gene                                                                                                  | BG915677  |
| 1418327_at   | R | 1.495 | 1110058L19Rik | RIKEN cDNA 1110058L19 gene                                                                                                  | NM_026503 |
| 1424110_a_at | R | 1.486 | Nme1          | expressed in non-metastatic cells 1, protein                                                                                | BC005629  |
| 1423972_at   | R | 1.482 | Etfa          | electron transferring flavoprotein, alpha polypeptide                                                                       | BC003432  |
| 1436840_x_at | R | 1.471 | Rpl35         | Transcribed sequence with strong similarity to protein sp:P42766 (H.sapiens) RL35_HUMAN 60S ribosomal protein L35           | AV124739  |
| 1416834_x_at | R | 1.469 | Ndufb2        | NADH dehydrogenase (ubiquinone) 1 beta subcomplex, 2                                                                        | NM_026612 |
| 1428679_s_at | R | 1.461 | 0610010K14Rik | RIKEN cDNA 0610010K14 gene                                                                                                  | AK003842  |
| 1448623_at   | R | 1.456 | 2310075C12Rik | RIKEN cDNA 2310075C12 gene                                                                                                  | NM_133739 |
| 1423804_a_at | R | 1.455 | Idi1          | isopentenyl-diphosphate delta isomerase                                                                                     | BC004801  |
| 1431771_a_at | R | 1.446 | Irak1bp1      | interleukin-1 receptor-associated kinase 1 binding protein 1                                                                | AK014712  |
| 1424121_at   | R | 1.444 | Commd1        | COMM domain containing 1                                                                                                    | AB076722  |
| 1437013_x_at | R | 1.433 | Atp6v0b       | AV339131 RIKEN full-length enriched, adult male olfactory bulb Mus musculus cDNA clone 6430502C13 3', mRNA sequence.        | AV339131  |
| 1437908_a_at | R | 1.432 | 1200007D18Rik | RIKEN cDNA 1200007D18 gene                                                                                                  | BB095626  |
| 1423916_s_at | R | 1.429 | Mlf2          | myeloid leukemia factor 2                                                                                                   | BC003975  |
| 1422718_at   | R | 1.427 | Ap3s2         | adaptor-related protein complex 3, sigma 2 subunit                                                                          | NM_009682 |
| 1417501_at   | R | 1.425 | Fbxo6b        | F-box only protein 6b                                                                                                       | NM_015797 |
| 1451259_at   | R | 1.424 | Smfn          | small fragment nuclease                                                                                                     | BC003445  |
| 1428360_x_at | R | 1.419 | Ndufa7        | NADH dehydrogenase (ubiquinone) 1 alpha subcomplex, 7 (B14.5a)                                                              | BI558499  |
| 1448595_a_at | R | 1.416 | Rex3          | reduced expression 3                                                                                                        | NM_009052 |
| 1422432_at   | R | 1.412 | Dbi           | diazepam binding inhibitor                                                                                                  | NM_007830 |
| 1448331_at   | R | 1.411 | Ndufb7        | calmegin                                                                                                                    | NM_025843 |
| 1428122_s_at | R | 1.410 | 2610528K11Rik | RIKEN cDNA 2610528K11 gene                                                                                                  | AK012178  |
| 1424396_a_at | R | 1.407 | Asrgl1        | asparaginase like 1                                                                                                         | AU040643  |
| 1427938_at   | R | 1.407 | Mycbp         | c-myc binding protein                                                                                                       | BB046347  |
| 1419398_a_at | R | 1.406 | Dp1           | deleted in polyposis 1                                                                                                      | NM_007874 |
| 1460670_at   | R | 1.399 | Riok3         | RIO kinase 3 (yeast)                                                                                                        | NM_024182 |
| 1418577_at   | R | 1.396 | Trim8         | tripartite motif protein 8                                                                                                  | BG063064  |

|              |   |       |               |                                                                                                                                                                                           |           |
|--------------|---|-------|---------------|-------------------------------------------------------------------------------------------------------------------------------------------------------------------------------------------|-----------|
| 1449080_at   | R | 1.394 | Hdac2         | histone deacetylase 2                                                                                                                                                                     | NM_008229 |
| 1428075_at   | R | 1.386 | Ndufb4        | NADH dehydrogenase (ubiquinone) 1 beta subcomplex 4                                                                                                                                       | BG968046  |
| 1451045_at   | R | 1.379 | Syt13         | synaptotagmin 13                                                                                                                                                                          | BE648447  |
| 1417652_a_at | R | 1.376 | Tbca          | tubulin cofactor a                                                                                                                                                                        | NM_009321 |
| 1460701_a_at | R | 1.371 | Mrpl52        | mitochondrial ribosomal protein L52                                                                                                                                                       | AV021593  |
| 1434872_x_at | R | 1.369 | Rpl37         | AV170241 Mus musculus head C57BL/6J 13-day embryo<br>Mus musculus cDNA clone 3110094P05, mRNA<br>sequence.                                                                                | AV170241  |
| 1423686_a_at | R | 1.364 | 1110020C13Rik | RIKEN cDNA 1110020C13 gene                                                                                                                                                                | BC016234  |
| 1456244_x_at | R | 1.359 | Txn12         | thioredoxin-like 2                                                                                                                                                                        | BB458835  |
| 1418896_a_at | R | 1.359 | Rpn2          | ribophorin II                                                                                                                                                                             | NM_019642 |
| 1455749_x_at | R | 1.359 | Ndufa7        | NADH dehydrogenase (ubiquinone) 1 alpha subcomplex, 7<br>(B14.5a)                                                                                                                         | C88880    |
| 1437907_a_at | R | 1.352 | Tbca          | tubulin cofactor a                                                                                                                                                                        | BB559082  |
| 1449294_at   | R | 1.348 | Mrps15        | mitochondrial ribosomal protein S15                                                                                                                                                       | NM_025544 |
| 1452646_at   | R | 1.347 | 1110029F20Rik | RIKEN cDNA 1110029F20 gene                                                                                                                                                                | AK003956  |
| 1419455_at   | R | 1.346 | Il10rb        | interleukin 10 receptor, beta                                                                                                                                                             | NM_008349 |
| 1426660_x_at | R | 1.345 | BC029892      | Similar to 60S ribosomal protein L23a (LOC268449),<br>mRNA                                                                                                                                | BF178310  |
| 1439415_x_at | R | 1.345 | Rps21         | ribosomal protein S21                                                                                                                                                                     | AV151252  |
| 1426297_at   | R | 1.344 | Tcfe2a        | transcription factor E2a                                                                                                                                                                  | AF352579  |
| 1450638_at   | R | 1.342 | Pdcd5         | programmed cell death 5                                                                                                                                                                   | AF161074  |
| 1438503_x_at | R | 1.339 | Edf1          | AV102509 Mus musculus C57BL/6J ES cell Mus musculus<br>cDNA clone 2410098K03, mRNA sequence.                                                                                              | AV102509  |
| 1426744_at   | R | 1.339 | Srebf2        | sterol regulatory element binding factor 2                                                                                                                                                | BM123132  |
| 1416057_at   | R | 1.335 | Np15          | nuclear protein 15.6                                                                                                                                                                      | BC027265  |
| 1415716_a_at | R | 1.321 | Rps27         | ribosomal protein S27                                                                                                                                                                     | AA208652  |
| 1422615_at   | R | 1.315 | Map4k4        | mitogen-activated protein kinase kinase kinase kinase 4                                                                                                                                   | NM_008696 |
| 1449256_a_at | R | 1.313 | Rab11a        | RAB11a, member RAS oncogene family                                                                                                                                                        | BC010722  |
| 1422778_at   | R | 1.312 | Taf9          | TAF9 RNA polymerase II, TATA box binding protein (TBP)-<br>associated factor                                                                                                              | NM_027139 |
| 1424684_at   | R | 1.310 | Rab5c         | RAB5C, member RAS oncogene family                                                                                                                                                         | BC023027  |
| 1428257_s_at | R | 1.305 | Dncl2a        | dynein, cytoplasmic, light chain 2A                                                                                                                                                       | BG791323  |
| 1417103_at   | R | 1.298 | Ddt           | D-dopachrome tautomerase                                                                                                                                                                  | NM_010027 |
| 1416910_at   | R | 1.296 | Dnajd1        | Dnaj (Hsp40) homolog, subfamily D, member 1                                                                                                                                               | NM_025384 |
| 1415919_at   | R | 1.295 | Npdc1         | neural proliferation, differentiation and control gene 1                                                                                                                                  | NM_008721 |
| 1417510_at   | R | 1.293 | Vps4a         | vacuolar protein sorting 4a (yeast)                                                                                                                                                       | NM_126165 |
| 1426209_at   | R | 1.291 | Strn4         | striatin, calmodulin binding protein 4                                                                                                                                                    | AF414080  |
| 1435431_at   | R | 1.289 | 2310047M15Rik | RIKEN cDNA 2310047M15 gene                                                                                                                                                                | AW558989  |
| 1448427_at   | R | 1.283 | Ndufa6        | NADH dehydrogenase (ubiquinone) 1 alpha subcomplex, 6<br>(B14)                                                                                                                            | NM_025987 |
| 1417399_at   | R | 1.280 | Gas6          | growth arrest specific 6                                                                                                                                                                  | NM_019521 |
| 1456663_x_at | R | 1.273 | 2410018G23Rik | BB718785 RIKEN full-length enriched, adult male liver<br>tumor Mus musculus cDNA clone C730019F01 3', mRNA<br>sequence.                                                                   | BB718785  |
| 1449429_at   | R | 1.273 | Fkbp1b        | FK506 binding protein 1b                                                                                                                                                                  | NM_016863 |
| 1429708_at   | R | 1.271 | Ndufa11       | NADH dehydrogenase (ubiquinone) 1 alpha subcomplex                                                                                                                                        | AA596846  |
| 1449046_a_at | R | 1.270 | 1110007C05Rik | RIKEN cDNA 1110007C05 gene                                                                                                                                                                | NM_025368 |
| 1420842_at   | R | 1.269 | Ptprf         | protein tyrosine phosphatase, receptor type, F                                                                                                                                            | BF235516  |
| 1435517_x_at | R | 1.266 | Ralb          | BB465250 RIKEN full-length enriched, 12 days embryo<br>spinal ganglion Mus musculus cDNA clone D130097N13 3'<br>similar to L19699 Rat GTP-binding protein (ral B) mRNA,<br>mRNA sequence. | BB465250  |
| 1420878_a_at | R | 1.264 | Ywhab         | tyrosine 3-monooxygenase/tryptophan 5-monooxygenase<br>activation protein, beta polypeptide                                                                                               | NM_018753 |
| 1448320_at   | R | 1.256 | Stim1         | stromal interaction molecule 1                                                                                                                                                            | NM_009287 |
| 1424285_s_at | R | 1.254 | Arl6ip4       | ADP-ribosylation factor-like 6 interacting protein 4                                                                                                                                      | AB035383  |

|              |   |       |               |                                                                                                                                |           |
|--------------|---|-------|---------------|--------------------------------------------------------------------------------------------------------------------------------|-----------|
| 1435873_a_at | R | 1.253 | Rpl13a        | Transcribed sequence with strong similarity to protein pir:S29539 (H.sapiens) S29539 ribosomal protein L13a, cytosolic - human | AI324936  |
| 1416816_at   | R | 1.253 | Nek7          | NIMA (never in mitosis gene a)-related expressed kinase 7                                                                      | NM_021605 |
| 1416845_at   | R | 1.252 | Hspa5bp1      | heat shock 70kDa protein 5 binding protein 1                                                                                   | NM_133804 |
| 1451232_at   | R | 1.250 | Cd151         | CD151 antigen                                                                                                                  | U89772    |
| 1452111_at   | R | 1.247 | Mrps35        | mitochondrial ribosomal protein S35                                                                                            | AV304074  |
| 1426475_at   | R | 1.244 | Hmbs          | Similar to Hydroxymethylbilane synthase (LOC383565), mRNA                                                                      | AI325144  |
| 1451573_a_at | R | 1.243 | Stx4a         | syntaxin 4A (placental)                                                                                                        | BC011491  |
| 1427903_at   | R | 1.242 | Phpt1         | RIKEN cDNA 1700008C22 gene                                                                                                     | BB650419  |
| 1418888_a_at | R | 1.239 | Sepr          | selenoprotein R                                                                                                                | NM_013759 |
| 1418991_at   | R | 1.235 | Bak1          | BCL2-antagonist/killer 1                                                                                                       | NM_007523 |
| 1416782_s_at | R | 1.235 | DXImx39e      | DNA segment, Chr X, Immunex 39, expressed                                                                                      | NM_138602 |
| 1416050_a_at | R | 1.232 | Scarb1        | scavenger receptor class B, member 1                                                                                           | NM_016741 |
| 1427119_at   | R | 1.230 | Spink4        | serine protease inhibitor, Kazal type 4                                                                                        | AV066321  |
| 1417285_a_at | R | 1.230 | Ndufa5        | NADH dehydrogenase (ubiquinone) 1 alpha subcomplex, 5                                                                          | NM_026614 |
| 1417340_at   | R | 1.223 | Txn12         | thioredoxin-like 2                                                                                                             | NM_023140 |
| 1422527_at   | R | 1.221 | H2-DMa        | histocompatibility 2, class II, locus DMA                                                                                      | NM_010386 |
| 1456628_x_at | R | 1.221 | Rps24         | ribosomal protein S24                                                                                                          | AV111319  |
| 1454870_x_at | R | 1.218 | D15ErtD747e   | DNA segment, Chr 15, ERATO Doi 747, expressed                                                                                  | BB251205  |
| 1451399_at   | R | 1.218 | Brp17         | brain protein 17                                                                                                               | BC008274  |
| 1460739_at   | R | 1.217 | D11Bwg0280e   | DNA segment, Chr 11, Brigham & Women's Genetics 0280e expressed                                                                | BQ174371  |
| 1460718_s_at | R | 1.216 | Mtch1         | mitochondrial carrier homolog 1 (C. elegans)                                                                                   | AF192558  |
| 1418225_at   | R | 1.215 | Orc2l         | origin recognition complex, subunit 2-like (S. cerevisiae)                                                                     | BB830976  |
| 1427173_a_at | R | 1.213 | Mrps33        | mitochondrial ribosomal protein S33                                                                                            | Y17852    |
| 1449188_at   | R | 1.211 | Midn          | midnolin                                                                                                                       | NM_021565 |
| 1454856_x_at | R | 1.211 | Rpl35         | ribosomal protein L35                                                                                                          | AV066335  |
| 1426940_at   | R | 1.209 | BC023957      | cDNA sequence BC023957                                                                                                         | BI412808  |
| 1418439_at   | R | 1.208 | 2900055D03Rik | RIKEN cDNA 2900055D03 gene                                                                                                     | NM_026065 |
| 1449855_s_at | R | 1.206 | Uchl3         | ubiquitin carboxyl-terminal esterase L3 (ubiquitin thiolesterase)                                                              | AB033370  |
| 1416243_a_at | R | 1.203 | Rpl35         | ribosomal protein L35                                                                                                          | NM_025592 |
| 1418567_a_at | R | 1.200 | Srp14         | signal recognition particle 14                                                                                                 | NM_009273 |
| 1451385_at   | R | 1.199 | 2310056P07Rik | RIKEN cDNA 2310056P07 gene                                                                                                     | BC010826  |
| 1453634_a_at | R | 1.196 | Erp29         | endoplasmic reticulum protein 29                                                                                               | AK013303  |
| 1438177_x_at | R | 1.193 | Lysal1        | AV255351 RIKEN full-length enriched, adult male testis (DH10B) Mus musculus cDNA clone 4921519B12 3', mRNA sequence.           | AV255351  |
| 1424351_at   | R | 1.191 | 1600023A02Rik | RIKEN cDNA 1600023A02 gene                                                                                                     | AF334269  |
| 1416109_at   | R | 1.190 | Fuca          | fucosidase, alpha-L- 1, tissue                                                                                                 | NM_024243 |
| 1427764_a_at | R | 1.189 | Tcfe2a        | transcription factor E2a                                                                                                       | D29919    |
| 1424708_at   | R | 1.188 | 1110014C03Rik | RIKEN cDNA 1110014C03 gene                                                                                                     | BI409239  |
| 1424269_a_at | R | 1.187 | Myl6          | myosin light chain, alkali, nonmuscle                                                                                          | BC026760  |
| 1435067_at   | R | 1.187 | B230208H17Rik | RIKEN cDNA B230208H17 gene                                                                                                     | BG075288  |
| 1448604_at   | R | 1.185 | AA407809      | expressed sequence AA407809                                                                                                    | NM_030724 |
| 1424380_at   | R | 1.185 | BC026744      | cDNA sequence BC026744                                                                                                         | BC026744  |
| 1433472_x_at | R | 1.182 | Rpl38         | RIKEN cDNA 0610025G13 gene                                                                                                     | AA050777  |
| 1426534_a_at | R | 1.182 | Arfgap3       | ADP-ribosylation factor GTPase activating protein 3                                                                            | BG067878  |
| 1423717_at   | R | 1.177 | Ak3l          | adenylate kinase 3 alpha-like                                                                                                  | BC019174  |
| 1418049_at   | R | 1.174 | Ltbp3         | latent transforming growth factor beta binding protein 3                                                                       | NM_008520 |
| 1435232_x_at | R | 1.173 | Mrpl15        | mitochondrial ribosomal protein L15                                                                                            | BI791064  |
| 1425194_a_at | R | 1.173 | 6330577E15Rik | RIKEN cDNA 6330577E15 gene                                                                                                     | BC024403  |
| 1424204_at   | R | 1.173 | Mrpl13        | mitochondrial ribosomal protein L13                                                                                            | AB049641  |
| 1448217_a_at | R | 1.171 | Rpl27         | ribosomal protein L27                                                                                                          | NM_011289 |
| 1448357_at   | R | 1.169 | Snrpg         | small nuclear ribonucleoprotein polypeptide G                                                                                  | NM_026506 |
| 1415762_x_at | R | 1.164 | Mrpl52        | mitochondrial ribosomal protein L52                                                                                            | AV021593  |

|              |   |       |               |                                                                                                                                                                     |           |
|--------------|---|-------|---------------|---------------------------------------------------------------------------------------------------------------------------------------------------------------------|-----------|
| 1452061_s_at | R | 1.164 | Strbp         | spermatid perinuclear RNA binding protein                                                                                                                           | AK006314  |
| 1423035_s_at | R | 1.163 | Txn15         | thioredoxin-like 5                                                                                                                                                  | AK004219  |
| 1448543_at   | R | 1.163 | 2310042G06Rik | RIKEN cDNA 2310042G06 gene                                                                                                                                          | NM_025531 |
| 1417320_at   | R | 1.161 | Grpel1        | GrpE-like 1, mitochondrial                                                                                                                                          | NM_024478 |
| 1434120_a_at | R | 1.159 | Metap2        | methionine aminopeptidase 2                                                                                                                                         | AW742814  |
| 1437679_a_at | R | 1.159 | Glrx2         | BB172698 RIKEN full-length enriched, adult male hypothalamus <i>Mus musculus</i> cDNA clone A230040G05 3', mRNA sequence.                                           | BB172698  |
| 1423764_s_at | R | 1.158 | Mrpl37        | mitochondrial ribosomal protein L37                                                                                                                                 | BC011065  |
| 1428842_a_at | R | 1.155 | Ngfrap1       | nerve growth factor receptor (TNFRSF16) associated protein 1                                                                                                        | BI407690  |
| 1423680_at   | R | 1.155 | Fads1         | RIKEN cDNA 0710001O03 gene                                                                                                                                          | BC026831  |
| 1421861_at   | R | 1.155 | Clstn1        | calyntenin 1                                                                                                                                                        | BG065300  |
| 1439454_x_at | R | 1.152 | 2410018G23Rik | RIKEN cDNA 2410018G23 gene                                                                                                                                          | AV337733  |
| 1416108_a_at | R | 1.150 | 1200002G13Rik | RIKEN cDNA 1200002G13 gene                                                                                                                                          | NM_025360 |
| 1434924_at   | R | 1.149 | Phf2          | PHD finger protein 2                                                                                                                                                | BF468039  |
| 1426480_at   | R | 1.148 | Sbds          | Shwachman-Bodian-Diamond syndrome homolog (human)                                                                                                                   | BB773592  |
| 1417481_at   | R | 1.146 | Ramp1         | receptor (calcitonin) activity modifying protein 1                                                                                                                  | NM_016894 |
| 1452272_a_at | R | 1.144 | Gfer          | growth factor, erv1 ( <i>S. cerevisiae</i> )-like (augmenter of liver regeneration)                                                                                 | BI901126  |
| 1428310_at   | R | 1.142 | D3Wsu161e     | RIKEN cDNA C330027G06 gene                                                                                                                                          | BF321707  |
| 1428823_at   | R | 1.140 | 2310057G13Rik | RIKEN cDNA 2310057G13 gene                                                                                                                                          | AK009957  |
| 1424773_at   | R | 1.140 | 1110012M11Rik | RIKEN cDNA 1110012M11 gene                                                                                                                                          | BC020119  |
| 1418248_at   | R | 1.140 | Gla           | galactosidase, alpha                                                                                                                                                | NM_013463 |
| 1418123_at   | R | 1.140 | Unc119        | unc-119 homolog ( <i>C. elegans</i> )                                                                                                                               | BC001990  |
| 1417773_at   | R | 1.139 | Nans          | 602916387F1 NCI_CGAP_Lu29 <i>Mus musculus</i> cDNA clone IMAGE:5067068 5', mRNA sequence.                                                                           | BI151886  |
| 1416493_at   | R | 1.136 | Ddost         | dolichyl-di-phosphooligosaccharide-protein glycotransferase                                                                                                         | NM_007838 |
| 1423240_at   | R | 1.134 | Src           | Rous sarcoma oncogene                                                                                                                                               | BG868120  |
| 1422579_at   | R | 1.132 | Hspe1         | heat shock protein 1 (chaperonin 10)                                                                                                                                | NM_008303 |
| 1448292_at   | R | 1.129 | Uqcr          | ubiquinol-cytochrome c reductase (6.4kD) subunit                                                                                                                    | NM_025650 |
| 1455288_at   | R | 1.128 | 1110036O03Rik | RIKEN cDNA 1110036O03 gene                                                                                                                                          | BE951265  |
| 1450106_a_at | R | 1.127 | Evl           | Ena-vasodilator stimulated phosphoprotein                                                                                                                           | NM_007965 |
| 1416807_at   | R | 1.125 | Rpl36a        | ribosomal protein L36a                                                                                                                                              | NM_019865 |
| 1417344_at   | R | 1.123 | 2900064A13Rik | RIKEN cDNA 2900064A13 gene                                                                                                                                          | BE915256  |
| 1418572_x_at | R | 1.122 | Tnfrsf12a     | tumor necrosis factor receptor superfamily, member 12a                                                                                                              | NM_013749 |
| 1418704_at   | R | 1.122 | S100a13       | S100 calcium binding protein A13                                                                                                                                    | NM_009113 |
| 1426648_at   | R | 1.122 | Mapkapk2      | MAP kinase-activated protein kinase 2                                                                                                                               | BG918951  |
| 1416519_at   | R | 1.120 | Rpl36         | ribosomal protein L36                                                                                                                                               | NM_018730 |
| 1452039_a_at | R | 1.118 | Bap1          | Brca1 associated protein 1                                                                                                                                          | AK009033  |
| 1417368_s_at | R | 1.116 | Ndufa2        | NADH dehydrogenase (ubiquinone) 1 alpha subcomplex, 2                                                                                                               | NM_010885 |
| 1435413_x_at | R | 1.115 | 2700060E02Rik | AV167958 <i>Mus musculus</i> head C57BL/6J 13-day embryo <i>Mus musculus</i> cDNA clone 3110059K19, mRNA sequence.                                                  | AV167958  |
| 1418000_a_at | R | 1.115 | Itm2b         | integral membrane protein 2B                                                                                                                                        | NM_008410 |
| 1419550_a_at | R | 1.113 | Stk39         | 6 days neonate head cDNA, RIKEN full-length enriched library, clone:5430411A13 product:serine/threonine kinase 39, STE20/SPS1 homolog (yeast), full insert sequence | BG919998  |
| 1450640_x_at | R | 1.109 | Atp5k         | ATP synthase, H+ transporting, mitochondrial F1F0 complex, subunit e                                                                                                | NM_007507 |
| 1451602_at   | R | 1.105 | Snx6          | sorting nexin 6                                                                                                                                                     | BC025911  |
| 1424073_at   | R | 1.100 | 5430437P03Rik | RIKEN cDNA 5430437P03 gene                                                                                                                                          | BC005692  |
| 1426811_at   | R | 1.099 | Ppp2r5b       | glycoprotein hormone alpha 2                                                                                                                                        | BB080065  |
| 1434019_at   | R | 1.099 | Pdap1         | PDGFA associated protein 1                                                                                                                                          | BG065186  |
| 1437976_x_at | R | 1.097 | BC029892      | Similar to 60S ribosomal protein L23a (LOC268449), mRNA                                                                                                             | C87154    |
| 1417026_at   | R | 1.096 | Pfdn1         | prefoldin 1                                                                                                                                                         | BC024693  |
| 1448346_at   | R | 1.095 | Cfl1          | cofilin 1, non-muscle                                                                                                                                               | NM_007687 |
| 1450668_s_at | R | 1.094 | Hspe1         | heat shock protein 1 (chaperonin 10)                                                                                                                                | NM_008303 |

|              |   |       |               |                                                                                                                                                              |           |
|--------------|---|-------|---------------|--------------------------------------------------------------------------------------------------------------------------------------------------------------|-----------|
| 1416636_at   | R | 1.093 | Rheb          | RAS-homolog enriched in brain                                                                                                                                | NM_053075 |
| 1416285_at   | R | 1.093 | Ndufc1        | NADH dehydrogenase (ubiquinone) 1, subcomplex unknown, 1                                                                                                     | NM_025523 |
| 1456205_x_at | R | 1.092 | Tbca          | tubulin cofactor a                                                                                                                                           | BB559082  |
| 1418625_s_at | R | 1.090 | LOC14433      | glyceraldehyde-3-phosphate dehydrogenase                                                                                                                     | NM_008084 |
| 1415879_a_at | R | 1.088 | Rplp2         | ribosomal protein, large P2                                                                                                                                  | BC012413  |
| 1416074_a_at | R | 1.088 | Rpl28         | ribosomal protein L28                                                                                                                                        | NM_009081 |
| 1424488_a_at | R | 1.087 | 1110013G13Rik | RIKEN cDNA 1110013G13 gene                                                                                                                                   | BC011417  |
| 1454760_at   | R | 1.086 | 2600017A12Rik | RIKEN cDNA 2600017A12 gene                                                                                                                                   | AW543705  |
| 1449108_at   | R | 1.086 | Fdx1          | ferredoxin 1                                                                                                                                                 | D43690    |
| 1417585_at   | R | 1.085 | Nup210        | nucleoporin 210                                                                                                                                              | NM_018815 |
| 1423133_at   | R | 1.085 | 0610040D20Rik | RIKEN cDNA 0610040D20 gene                                                                                                                                   | BG071645  |
| 1435112_a_at | R | 1.083 | Atp5h         | ATP synthase, H+ transporting, mitochondrial F0 complex, subunit d                                                                                           | AV154755  |
| 1456373_x_at | R | 1.079 |               | ribosomal protein S20                                                                                                                                        | AV046829  |
| 1437767_s_at | R | 1.079 | Fts           | retinoblastoma-like 2                                                                                                                                        | AA138720  |
| 1426244_at   | R | 1.079 | Mapre2        | microtubule-associated protein, RP/EB family, member 2                                                                                                       | BC027056  |
| 1451747_a_at | R | 1.075 | Apg12l        | autophagy 12-like (S. cerevisiae)                                                                                                                            | AK016474  |
| 1451425_a_at | R | 1.075 | Mkrn1         | makorin, ring finger protein, 1                                                                                                                              | BC003329  |
| 1460428_at   | R | 1.074 | 1100001D10Rik | RIKEN cDNA 1100001D10 gene                                                                                                                                   | BC003286  |
| 1450878_at   | R | 1.074 | Sri           | RIKEN cDNA 2210417O06 gene                                                                                                                                   | AK008404  |
| 1436949_a_at | R | 1.073 | Tceb2         | AV068352 Mus musculus small intestine C57BL/6J adult Mus musculus cDNA clone 2010303D07, mRNA sequence.                                                      | AV068352  |
| 1448971_at   | R | 1.070 | 2410022L05Rik | RIKEN cDNA 2410022L05 gene                                                                                                                                   | NM_025556 |
| 1416480_a_at | R | 1.070 | Hig1          | hypoxia induced gene 1                                                                                                                                       | NM_019814 |
| 1439462_x_at | R | 1.068 | 1110014C03Rik | AV060550 Mus musculus pancreas C57BL/6J adult Mus musculus cDNA clone 1810063I09, mRNA sequence.                                                             | AV060550  |
| 1426323_x_at | R | 1.064 | Siva          | Cd27 binding protein (Hindu God of destruction)                                                                                                              | AF033112  |
| 1417511_at   | R | 1.062 | Lyar          | Ly1 antibody reactive clone                                                                                                                                  | NM_025281 |
| 1418901_at   | R | 1.058 | Cebpb         | CCAAT/enhancer binding protein (C/EBP), beta                                                                                                                 | NM_009883 |
| 1448656_at   | R | 1.057 | Cacnb3        | calcium channel, voltage-dependent, beta 3 subunit                                                                                                           | NM_007581 |
| 1452585_at   | R | 1.057 | Mrps28        | mitochondrial ribosomal protein S28                                                                                                                          | AK011036  |
| 1456243_x_at | R | 1.056 | Mcl1          | BB374534 RIKEN full-length enriched, 16 days embryo head Mus musculus cDNA clone C130075I17 3' similar to U35623 Mus musculus EAT/MCL-1 mRNA, mRNA sequence. | BB374534  |
| 1426529_a_at | R | 1.052 | Tagln2        | transgelin 2                                                                                                                                                 | C76322    |
| 1417075_at   | R | 1.052 | 2010309E21Rik | RIKEN cDNA 2010309E21 gene                                                                                                                                   | NM_025591 |
| 1448284_a_at | R | 1.051 | Ndufc1        | NADH dehydrogenase (ubiquinone) 1, subcomplex unknown, 1                                                                                                     | NM_025523 |
| 1460354_a_at | R | 1.050 | Mrpl13        | mitochondrial ribosomal protein L13                                                                                                                          | AB049641  |
| 1415950_a_at | R | 1.048 | Pbp           | phosphatidylethanolamine binding protein                                                                                                                     | NM_018858 |
| 1422134_at   | R | 1.047 | Fosb          | FBJ osteosarcoma oncogene B                                                                                                                                  | NM_008036 |
| 1417774_at   | R | 1.045 | Nans          | 602916387F1 NCI_CGAP_Lu29 Mus musculus cDNA clone IMAGE:5067068 5', mRNA sequence.                                                                           | BI151886  |
| 1424894_at   | R | 1.045 | Rab13         | RAB13, member RAS oncogene family                                                                                                                            | BC027214  |
| 1437975_a_at | R | 1.043 | BC029892      | Similar to 60S ribosomal protein L23a (LOC268449), mRNA                                                                                                      | C87154    |
| 1439234_a_at | R | 1.042 | 2410018G23Rik | RIKEN cDNA 2410018G23 gene                                                                                                                                   | BE200117  |
| 1418029_at   | R | 1.042 | Faim          | Fas apoptotic inhibitory molecule                                                                                                                            | NM_011810 |
| 1423080_at   | R | 1.042 | Tom20         | translocase of outer mitochondrial membrane 20 homolog (yeast)                                                                                               | AK002902  |
| 1449245_at   | R | 1.042 | Grin2c        | glutamate receptor, ionotropic, NMDA2C (epsilon 3)                                                                                                           | NM_010350 |
| 1438058_s_at | R | 1.041 | Ptov1         | prostate tumor over expressed gene 1                                                                                                                         | BG073526  |
| 1418714_at   | R | 1.041 | Dusp8         | dual specificity phosphatase 8                                                                                                                               | NM_008748 |
| 1417893_at   | R | 1.039 | Sfxn3         | sideroflexin 3                                                                                                                                               | NM_053197 |
| 1424456_at   | R | 1.037 | Pvrl2         | poliovirus receptor-related 2                                                                                                                                | BC009088  |
| 1433549_x_at | R | 1.036 | Rps21         | ribosomal protein S21                                                                                                                                        | AV123618  |

|              |   |       |               |                                                                                                                                                            |           |
|--------------|---|-------|---------------|------------------------------------------------------------------------------------------------------------------------------------------------------------|-----------|
| 1435712_a_at | R | 1.033 | Rps18         | Transcribed sequence with strong similarity to protein ref:NP_072045.1 (H.sapiens) ribosomal protein S18; 40S ribosomal protein S18 [Homo sapiens]         | AW907444  |
| 1451012_a_at | R | 1.032 | Csda          | AV216648 RIKEN full-length enriched, ES cells Mus musculus cDNA clone 2410165103 3' similar to D14485 Mouse mRNA for dbpA murine homologue, mRNA sequence. | AV216648  |
| 1418656_at   | R | 1.032 | Lsm5          | LSM5 homolog, U6 small nuclear RNA associated (S. cerevisiae)                                                                                              | NM_025520 |
| 1448592_at   | R | 1.031 | Crtap         | cartilage associated protein                                                                                                                               | NM_019922 |
| 1455129_at   | R | 1.030 | 2610103J23Rik | RIKEN cDNA 2610103J23 gene                                                                                                                                 | AV083741  |
| 1433991_x_at | R | 1.030 | Dbi           | diazepam binding inhibitor                                                                                                                                 | AV007315  |
| 1438659_x_at | R | 1.027 | 0710001P09Rik | BB458460 RIKEN full-length enriched, 12 days embryo spinal ganglion Mus musculus cDNA clone D130057E08 3', mRNA sequence.                                  | BB458460  |
| 1455126_x_at | R | 1.026 | 2310028O11Rik | Adult male xiphoid cartilage cDNA, RIKEN full-length enriched library, clone:5230400C04 product:unknown EST, full insert sequence                          | AV209841  |
| 1419351_a_at | R | 1.025 | 0610007P06Rik | RIKEN cDNA 0610007P06 gene                                                                                                                                 | BC003916  |
| 1433721_x_at | R | 1.024 | Rps21         | ribosomal protein S21                                                                                                                                      | AV123577  |
| 1416245_at   | R | 1.023 | 0610033H09Rik | RIKEN cDNA 0610033H09 gene                                                                                                                                 | NM_025338 |
| 1421152_a_at | R | 1.021 | Gnao          | guanine nucleotide binding protein, alpha o                                                                                                                | NM_010308 |
| 1450981_at   | R | 1.020 | Cnn2          | calponin 2                                                                                                                                                 | BI663014  |
| 1450925_a_at | R | 1.019 | Rps27l        | ribosomal protein S27-like                                                                                                                                 | BB836796  |
| 1424771_at   | R | 1.019 | E130307C13    | hypothetical protein E130307C13                                                                                                                            | BF661121  |
| 1449289_a_at | R | 1.018 | B2m           | RIKEN cDNA E130113K22 gene                                                                                                                                 | BF715219  |
| 1428189_at   | R | 1.018 | 5730494M16Rik | RIKEN cDNA 5730494M16 gene                                                                                                                                 | BQ174627  |
| 1456745_x_at | R | 1.018 | Sdbcag84      | serologically defined breast cancer antigen 84                                                                                                             | BB253632  |
| 1448372_a_at | R | 1.014 | Tmem4         | transmembrane protein 4                                                                                                                                    | NM_019953 |
| 1427511_at   | R | 1.014 | B2m           | beta-2 microglobulin                                                                                                                                       | AA170322  |
| 1455364_a_at | R | 1.013 | Rps7          | Similar to Rpl7a protein (LOC245667), mRNA                                                                                                                 | AI414989  |
| 1448589_at   | R | 1.011 | Ndufb5        | NADH dehydrogenase (ubiquinone) 1 beta subcomplex, 5                                                                                                       | BC025155  |
| 1425196_a_at | R | 1.011 | Hint2         | histidine triad nucleotide binding protein 2                                                                                                               | AF356874  |
| 1451211_a_at | R | 1.009 | Lgtn          | ligatin                                                                                                                                                    | BC025036  |
| 1424222_s_at | R | 1.008 | Rad23b        | Mus musculus cDNA clone IMAGE:3256899, complete cds.                                                                                                       | BC006751  |
| 1415673_at   | R | 1.007 | Psph          | phosphoserine phosphatase                                                                                                                                  | NM_133900 |
| 1417102_a_at | R | 1.007 | Ndufb5        | NADH dehydrogenase (ubiquinone) 1 beta subcomplex, 5                                                                                                       | BC025155  |
| 1417879_at   | R | 1.007 | 1110060M21Rik | RIKEN cDNA 1110060M21 gene                                                                                                                                 | NM_025424 |
| 1448344_at   | R | 1.003 | Rps12         | ribosomal protein S12                                                                                                                                      | NM_011295 |
| 1437381_x_at | R | 1.002 | D15Ertd747e   | BB236260 RIKEN full-length enriched, 3 days neonate thymus Mus musculus cDNA clone A630058C06 3', mRNA sequence.                                           | BB236260  |
| 1448699_at   | R | 1.002 | Mrpl54        | mitochondrial ribosomal protein L54                                                                                                                        | NM_025317 |
| 1434736_at   | R | 1.001 | Hlf           | hepatic leukemia factor                                                                                                                                    | BB744589  |
| 1426510_at   | R | 1.000 | C330023F11Rik | RIKEN cDNA C330023F11 gene                                                                                                                                 | AW537824  |
| 1452679_at   | R | 1.000 | 2410129E14Rik | Transcribed sequence with strong similarity to protein ref:NP_001060.1 (H.sapiens) tubulin, beta polypeptide [Homo sapiens]                                | AA986082  |
| 1448657_a_at | R | 0.999 | Dnajb10       | DnaJ (Hsp40) homolog, subfamily B, member 10                                                                                                               | NM_020266 |
| 1416247_at   | R | 0.999 | Dctn3         | dynactin 3                                                                                                                                                 | NM_016890 |
| 1423907_a_at | R | 0.997 | Ndufs8        | NADH dehydrogenase (ubiquinone) Fe-S protein 8                                                                                                             | BC021616  |
| 1417183_at   | R | 0.996 | Dnaja2        | DnaJ (Hsp40) homolog, subfamily A, member 2                                                                                                                | C77509    |
| 1452754_at   | R | 0.996 | 5730592L21Rik | RIKEN cDNA 5730592L21 gene                                                                                                                                 | AK017880  |
| 1460697_s_at | R | 0.995 | 2610209M04Rik | RIKEN cDNA 2610209M04 gene                                                                                                                                 | BC027564  |
| 1417869_s_at | R | 0.994 | Ctsz          |                                                                                                                                                            | NM_022325 |
| 1434358_x_at | R | 0.994 | Rps21         | Transcribed sequence with moderate similarity to protein ref:NP_001015.1 (H.sapiens) ribosomal protein S21; 40S ribosomal protein S21 [Homo sapiens]       | AV124427  |
| 1433554_at   | R | 0.994 | AU022870      | hypothetical protein MGC56855                                                                                                                              | BM246500  |



|              |   |       |               |                                                                                                                                                                                                |           |
|--------------|---|-------|---------------|------------------------------------------------------------------------------------------------------------------------------------------------------------------------------------------------|-----------|
| 1438986_x_at | R | 0.994 | Rps17         | ribosomal protein S17                                                                                                                                                                          | AV064451  |
| 1426680_at   | R | 0.993 | Sepr1         | RIKEN cDNA 1110019112 gene                                                                                                                                                                     | AK003819  |
| 1444952_a_at | R | 0.991 | 8430423A01Rik | RIKEN cDNA 8430423A01 gene                                                                                                                                                                     | BB260383  |
| 1452370_s_at | R | 0.990 | B230208H17Rik | RIKEN cDNA B230208H17 gene                                                                                                                                                                     | BB449608  |
| 1451255_at   | R | 0.988 | Lisch7        | liver-specific bHLH-Zip transcription factor                                                                                                                                                   | BC004672  |
| 1428214_at   | R | 0.988 | Tomm7         | translocase of outer mitochondrial membrane 7 homolog (yeast)                                                                                                                                  | BB609428  |
| 1423087_a_at | R | 0.987 | 1110002E23Rik | RIKEN cDNA 1110002E23 gene                                                                                                                                                                     | BB453951  |
| 1423365_at   | R | 0.987 | Cacna1g       | calcium channel, voltage-dependent, T type, alpha 1G subunit                                                                                                                                   | AW494038  |
| 1434976_x_at | R | 0.985 | Eif4ebp1      | AV216412 RIKEN full-length enriched, ES cells Mus musculus cDNA clone 2410160M04 3' similar to U28656 Mus musculus insulin-stimulated eIF-4E binding protein PHAS-I mRNA, mRNA sequence.       | AV216412  |
| 1416971_at   | R | 0.985 | Cox7a2        | cytochrome c oxidase, subunit VIIa 2                                                                                                                                                           | NM_009945 |
| 1423736_a_at | R | 0.985 | 4933427L07Rik | RIKEN cDNA 4933427L07 gene                                                                                                                                                                     | BC018220  |
| 1456540_s_at | R | 0.982 | Mtmr6         | BB297632 RIKEN full-length enriched, 9.5 days embryo parthenogenote Mus musculus cDNA clone B130063F15 3' similar to AF072928 Homo sapiens myotubularin related protein 6 mRNA, mRNA sequence. | BB297632  |
| 1415912_a_at | R | 0.981 | Rps13         | ribosomal protein S13                                                                                                                                                                          | NM_026533 |
| 1448498_at   | R | 0.981 | Rps6ka4       | ribosomal protein S6 kinase, polypeptide 4                                                                                                                                                     | NM_019924 |
| 1448876_at   | R | 0.978 | Evc           | Ellis van Creveld gene homolog (human)                                                                                                                                                         | NM_021292 |
| 1418545_at   | R | 0.978 | Wasf1         | WASP family 1                                                                                                                                                                                  | NM_031877 |
| 1452586_at   | R | 0.978 | 1810004D07Rik | RIKEN cDNA 1810004D07 gene                                                                                                                                                                     | BM122700  |
| 1437947_x_at | R | 0.976 | Vdac1         | AV036172 Mus musculus adult C57BL/6J placenta Mus musculus cDNA clone 1600017H06, mRNA sequence.                                                                                               | AV036172  |
| 1423294_at   | R | 0.972 | Mest          | Transcribed sequence with moderate similarity to protein sp:Q9UBF2 (H.sapiens) CPG2_HUMAN Coatomer gamma-2 subunit                                                                             | AW555393  |
| 1460424_at   | R | 0.971 | 1810008O21Rik | RIKEN cDNA 1810008O21 gene                                                                                                                                                                     | BI411309  |
| 1435277_x_at | R | 0.971 | Nme1          | AV156640 Mus musculus head C57BL/6J 12-day embryo Mus musculus cDNA clone 3000003N22, mRNA sequence.                                                                                           | AV156640  |
| 1428029_a_at | R | 0.971 | H2av          | H2A histone family, member V                                                                                                                                                                   | BC028539  |
| 1422451_at   | R | 0.967 | Mrps21        | mitochondrial ribosomal protein S21                                                                                                                                                            | NM_078479 |
| 1422524_at   | R | 0.967 | Abcb6         | ATP-binding cassette, sub-family B (MDR/TAP), member 6                                                                                                                                         | NM_023732 |
| 1417357_at   | R | 0.966 | Emd           | emerin                                                                                                                                                                                         | NM_007927 |
| 1426606_at   | R | 0.965 | Crtac1        | cartilage acidic protein 1                                                                                                                                                                     | BB426194  |
| 1452181_at   | R | 0.965 | Ckap4         | BB312117 RIKEN full-length enriched, adult male corpora quadrigemina Mus musculus cDNA clone B230331K02 3' similar to X69910 H.sapiens p63 mRNA for transmembrane protein, mRNA sequence.      | BB312117  |
| 1418986_a_at | R | 0.964 | Uxt           | ubiquitously expressed transcript                                                                                                                                                              | NM_013840 |
| 1451071_a_at | R | 0.963 | Atp1a1        | ATPase, Na <sup>+</sup> /K <sup>+</sup> transporting, alpha 1 polypeptide                                                                                                                      | BC025618  |
| 1438776_x_at | R | 0.961 | Rps17         | AV046534 Mus musculus adult C57BL/6J testis Mus musculus cDNA clone 1700057O18, mRNA sequence.                                                                                                 | AV046534  |
| 1424640_at   | R | 0.961 | 1110033P22Rik | RIKEN cDNA 1110033P22 gene                                                                                                                                                                     | BC018479  |
| 1449040_a_at | R | 0.960 | Seps2         | selenophosphate synthetase 2                                                                                                                                                                   | NM_009266 |
| 1417722_at   | R | 0.960 | Pgls          | 6-phosphogluconolactonase                                                                                                                                                                      | BC006594  |
| 1448869_a_at | R | 0.956 | Mrps16        | mitochondrial ribosomal protein S16                                                                                                                                                            | NM_025440 |
| 1426782_at   | R | 0.955 | 3830613O22Rik | RIKEN cDNA 3830613O22 gene                                                                                                                                                                     | BC019649  |
| 1422683_at   | R | 0.955 | Irak1bp1      | interleukin-1 receptor-associated kinase 1 binding protein 1                                                                                                                                   | NM_022986 |
| 1448799_s_at | R | 0.954 | Mrps12        | nuclear factor of kappa light chain gene enhancer in B-cells inhibitor, beta                                                                                                                   | NM_011885 |
| 1423181_s_at | R | 0.954 | Clns1a        | chloride channel, nucleotide-sensitive, 1A                                                                                                                                                     | AK011789  |
| 1427282_a_at | R | 0.952 | Frda          | Friedreich ataxia                                                                                                                                                                              | AV007132  |
| 1416054_at   | R | 0.951 | Rps5          | ribosomal protein S5                                                                                                                                                                           | NM_009095 |
| 1452621_at   | R | 0.948 | 2700061N24Rik | RIKEN cDNA 2700061N24 gene                                                                                                                                                                     | AI324894  |
| 1428954_at   | R | 0.947 | Slc9a3r2      | solute carrier family 9 (sodium/hydrogen exchanger), isoform 3 regulator 2                                                                                                                     | AK004710  |

|              |   |       |               |                                                                                                                                                                                                                    |           |
|--------------|---|-------|---------------|--------------------------------------------------------------------------------------------------------------------------------------------------------------------------------------------------------------------|-----------|
| 1418744_s_at | R | 0.946 | Tesc          | tescalcin                                                                                                                                                                                                          | NM_021344 |
| 1451291_at   | R | 0.946 | 2610036N15Rik | RIKEN cDNA 2610036N15 gene                                                                                                                                                                                         | BC026942  |
| 1415980_at   | R | 0.945 | Atp5g2        | ATP synthase, H+ transporting, mitochondrial F0 complex, subunit c (subunit 9), isoform 2                                                                                                                          | NM_026468 |
| 1451178_at   | R | 0.944 | Mrpl53        | mitochondrial ribosomal protein L53                                                                                                                                                                                | BC022162  |
| 1416696_at   | R | 0.943 | D17Wsu104e    | interleukin 25                                                                                                                                                                                                     | NM_080837 |
| 1451017_at   | R | 0.942 | Sdbcag84      | BB556862 RIKEN full-length enriched, 2 days pregnant adult female ovary Mus musculus cDNA clone E330025K14 3' similar to AL161963 Homo sapiens mRNA; cDNA DKFZp547A2190 (from clone DKFZp547A2190), mRNA sequence. | BB556862  |
| 1456293_s_at | R | 0.941 | Ccnh          | cyclin H                                                                                                                                                                                                           | AA068868  |
| 1434230_at   | R | 0.941 | Polb          | polymerase (DNA directed), beta                                                                                                                                                                                    | BG094331  |
| 1418579_at   | R | 0.940 | Cetn2         | centrin 2                                                                                                                                                                                                          | BC013545  |
| 1424076_at   | R | 0.939 | 2610020H15Rik | RIKEN cDNA 2610020H15 gene                                                                                                                                                                                         | AK016023  |
| 1449267_at   | R | 0.939 | 3110023E09Rik | RIKEN cDNA 3110023E09 gene                                                                                                                                                                                         | BC006876  |
| 1417886_at   | R | 0.939 | 1810009A15Rik | RIKEN cDNA 1110055N21 gene                                                                                                                                                                                         | BE307471  |
| 1416412_at   | R | 0.937 | Nsmaf         | neutral sphingomyelinase (N-SMase) activation associated factor                                                                                                                                                    | NM_010945 |
| 1422520_at   | R | 0.936 | Nef3          | neurofilament 3, medium                                                                                                                                                                                            | NM_008691 |
| 1428179_at   | R | 0.935 | Ndufv2        | NADH dehydrogenase (ubiquinone) flavoprotein 2                                                                                                                                                                     | BI692577  |
| 1420113_s_at | R | 0.933 | 2410022L05Rik | RIKEN cDNA 2410022L05 gene                                                                                                                                                                                         | AA409325  |
| 1439466_s_at | R | 0.933 | Ptcd1         | BB001490 RIKEN full-length enriched, 13 days embryo head Mus musculus cDNA clone 3110026K15 3' similar to AF058791 Rattus norvegicus G10 protein homolog (edg2) mRNA, mRNA sequence.                               | BB001490  |
| 1434883_at   | R | 0.929 | 2610103J23Rik | RIKEN cDNA 2610103J23 gene                                                                                                                                                                                         | AV083741  |
| 1435652_a_at | R | 0.929 | Gnai2         | uz40a02.x1 NCI_CGAP_Mam5 Mus musculus cDNA clone IMAGE:3671498 3', mRNA sequence.                                                                                                                                  | BF228116  |
| 1452246_at   | R | 0.929 | Ostf1         | osteoclast stimulating factor 1                                                                                                                                                                                    | U58888    |
| 1420513_at   | R | 0.928 | 1700073K01Rik | RIKEN cDNA 1700073K01 gene                                                                                                                                                                                         | BC025062  |
| 1430128_a_at | R | 0.928 | Dp111         | deleted in polyposis 1-like 1                                                                                                                                                                                      | AK002562  |
| 1416605_at   | R | 0.927 | Nola2         | nucleolar protein family A, member 2                                                                                                                                                                               | BC024944  |
| 1449194_at   | R | 0.926 | Mrps25        | mitochondrial ribosomal protein S25                                                                                                                                                                                | AK004037  |
| 1416349_at   | R | 0.926 | Mrpl34        | mitochondrial ribosomal protein L34                                                                                                                                                                                | NM_053162 |
| 1448887_x_at | R | 0.920 | Fxc1          | fractured callus expressed transcript 1                                                                                                                                                                            | NM_019502 |
| 1424300_at   | R | 0.919 | Gemin6        | gem (nuclear organelle) associated protein 6                                                                                                                                                                       | BC025157  |
| 1417959_at   | R | 0.918 | Pdlim7        | PDZ and LIM domain 7                                                                                                                                                                                               | NM_026131 |
| 1418743_a_at | R | 0.918 | Tesc          | tescalcin                                                                                                                                                                                                          | NM_021344 |
| 1422525_at   | R | 0.918 | Atp5k         | ATP synthase, H+ transporting, mitochondrial F1F0 complex, subunit e                                                                                                                                               | NM_007507 |
| 1421817_at   | R | 0.913 | Gsr           | glutathione reductase 1                                                                                                                                                                                            | AK019177  |
| 1416769_s_at | R | 0.912 | Atp6v0b       | ATPase, H+ transporting, V0 subunit B                                                                                                                                                                              | NM_033617 |
| 1431036_a_at | R | 0.912 | 1110032D12Rik | RIKEN cDNA 1110032D12 gene                                                                                                                                                                                         | BF121933  |
| 1427876_at   | R | 0.912 | 2610312B22Rik | RIKEN cDNA 2610312B22 gene                                                                                                                                                                                         | BB703070  |
| 1422977_at   | R | 0.912 | Gp1bb         | glycoprotein Ib, beta polypeptide                                                                                                                                                                                  | NM_010327 |
| 1448198_a_at | R | 0.909 | Ndufb8        | NADH dehydrogenase (ubiquinone) 1 beta subcomplex 8                                                                                                                                                                | NM_026061 |
| 1433928_a_at | R | 0.908 | Rpl13a        | ribosomal protein L13a                                                                                                                                                                                             | BF146301  |
| 1423897_at   | R | 0.907 | 2410016F01Rik | RIKEN cDNA 2410016F01 gene                                                                                                                                                                                         | AW488376  |
| 1439451_x_at | R | 0.906 | D15ErtD747e   | BB487787 RIKEN full-length enriched, 13 days embryo lung Mus musculus cDNA clone D430044J16 3', mRNA sequence.                                                                                                     | BB487787  |
| 1430295_at   | R | 0.906 | Gna13         | guanine nucleotide binding protein, alpha 13                                                                                                                                                                       | BG094302  |
| 1423242_at   | R | 0.906 | Mrps36        | mitochondrial ribosomal protein S36                                                                                                                                                                                | BE627004  |
| 1453651_a_at | R | 0.904 | Brp44l        | AV223468 RIKEN full-length enriched, 18 days pregnant, placenta and extra embryonic tissue Mus musculus cDNA clone 3830411118 3', mRNA sequence.                                                                   | AV223468  |
| 1436803_a_at | R | 0.903 | Ndufb9        | NADH dehydrogenase (ubiquinone) 1 beta subcomplex, 9                                                                                                                                                               | AV161987  |

|              |   |       |               |                                                                                                                                                                                    |           |
|--------------|---|-------|---------------|------------------------------------------------------------------------------------------------------------------------------------------------------------------------------------|-----------|
| 1421266_s_at | R | 0.902 | Nfkbib        | nuclear factor of kappa light chain gene enhancer in B-cells inhibitor, beta                                                                                                       | NM_010908 |
| 1418589_a_at | R | 0.902 | Mlf1          | myeloid leukemia factor 1                                                                                                                                                          | AF100171  |
| 1418588_at   | R | 0.902 | Vmp           | vesicular membrain protein p24                                                                                                                                                     | NM_009513 |
| 1448737_at   | R | 0.901 | Tm4sf2        | transmembrane 4 superfamily member 2                                                                                                                                               | AF052492  |
| 1429265_a_at | R | 0.900 | Rnf130        | ring finger protein 130                                                                                                                                                            | AK011088  |
| 1454859_a_at | R | 0.899 | Rpl23         | Similar to ribosomal protein L23 (LOC384399), mRNA                                                                                                                                 | AV124394  |
| 1416022_at   | R | 0.899 | Fabp5         | fatty acid binding protein 5, epidermal                                                                                                                                            | BC002008  |
| 1456584_x_at | R | 0.898 | Phgdh         | BB495884 RIKEN full-length enriched, 13 days embryo stomach Mus musculus cDNA clone D530050H10 3' similar to L21027 Mus musculus A10 mRNA, mRNA sequence.                          | BB495884  |
| 1417458_s_at | R | 0.898 | Cks2          | CDC28 protein kinase regulatory subunit 2                                                                                                                                          | NM_025415 |
| 1439410_x_at | R | 0.897 | 3010027G13Rik | RIKEN cDNA 3010027G13 gene                                                                                                                                                         | BI966363  |
| 1416608_a_at | R | 0.896 | BC004004      | cDNA sequence BC004004                                                                                                                                                             | NM_030561 |
| 1423321_at   | R | 0.896 | Myadm         | myeloid-associated differentiation marker                                                                                                                                          | BI078799  |
| 1419765_at   | R | 0.896 | Cul2          | cullin 2                                                                                                                                                                           | NM_029402 |
| 1454987_a_at | R | 0.895 | H2-Ke6        | H2-K region expressed gene 6                                                                                                                                                       | AI323545  |
| 1416965_at   | R | 0.893 | Pcsk1n        | proprotein convertase subtilisin/kexin type 1 inhibitor                                                                                                                            | AF181560  |
| 1423653_at   | R | 0.893 | Atp1a1        | ATPase, Na <sup>+</sup> /K <sup>+</sup> transporting, alpha 1 polypeptide                                                                                                          | BC025618  |
| 1423993_at   | R | 0.890 | Atp6v1f       | ATPase, H <sup>+</sup> transporting, V1 subunit F                                                                                                                                  | BC016553  |
| 1419456_at   | R | 0.890 | Dcxr          | dicarbonyl L-xylulose reductase                                                                                                                                                    | BC012247  |
| 1451745_a_at | R | 0.889 | Znhit1        | zinc finger, HIT domain containing 1                                                                                                                                               | BC026751  |
| 1423746_at   | R | 0.889 | Txndc5        | thioredoxin domain containing 5                                                                                                                                                    | BC016252  |
| 1450389_s_at | R | 0.889 | Pip5k1a       | phosphatidylinositol-4-phosphate 5-kinase, type 1 alpha                                                                                                                            | NM_008846 |
| 1433616_a_at | R | 0.888 | 2310028O11Rik | Adult male xiphoid cartilage cDNA, RIKEN full-length enriched library, clone:5230400C04 product:unknown EST, full insert sequence                                                  | BG793007  |
| 1425485_at   | R | 0.886 | Mtmr6         | myotubularin related protein 6                                                                                                                                                     | BC020019  |
| 1441866_s_at | R | 0.884 | Ptdss1        | BB526117 RIKEN full-length enriched, 15 days embryo head Mus musculus cDNA clone D930031G20 3' similar to AF042731 Mus musculus phosphatidylserine synthase-1 mRNA, mRNA sequence. | BB526117  |
| 1435364_at   | R | 0.883 |               | 4 days neonate male adipose cDNA, RIKEN full-length enriched library, clone:B430101C18 product:HYPOTHETICAL 19.9 KDA PROTEIN homolog [Homo sapiens], full insert sequence          | BB323901  |
| 1416394_at   | R | 0.883 | Bag1          | Bcl2-associated athanogene 1                                                                                                                                                       | NM_009736 |
| 1415880_a_at | R | 0.883 | Lamp1         | lysosomal membrane glycoprotein 1                                                                                                                                                  | NM_010684 |
| 1421903_at   | R | 0.883 | 2810405O22Rik | RIKEN cDNA 2810405O22 gene                                                                                                                                                         | AK005112  |
| 1428526_at   | R | 0.882 | 1500034E06Rik | RIKEN cDNA 1500034E06 gene                                                                                                                                                         | AK018782  |
| 1437345_a_at | R | 0.882 | Bscl2         | Bernardinelli-Seip congenital lipodystrophy 2 homolog (human)                                                                                                                      | BB223872  |
| 1449000_at   | R | 0.880 | D10Jhu81e     | DNA segment, Chr 10, Johns Hopkins University 81 expressed                                                                                                                         | NM_138601 |
| 1456616_a_at | R | 0.880 | Bsg           | AV035166 Mus musculus adult C57BL/6J placenta Mus musculus cDNA clone 1600013O06, mRNA sequence.                                                                                   | AV035166  |
| 1424171_a_at | R | 0.879 | Hagh          | hydroxyacyl glutathione hydrolase                                                                                                                                                  | BC004749  |
| 1423507_a_at | R | 0.879 | Sirt2         | Transcribed sequence with moderate similarity to protein ref:NP_036369.2 (H.sapiens) sirtuin 2, isoform 1; SIR2                                                                    | BB807595  |
| 1451386_at   | R | 0.879 | Blvrb         | biliverdin reductase B (flavin reductase (NADPH))                                                                                                                                  | BC027279  |
| 1448824_at   | R | 0.878 | Ube2j1        | ubiquitin-conjugating enzyme E2, J1                                                                                                                                                | NM_019586 |
| 1434325_x_at | R | 0.877 | Prkar1b       | BB274009 RIKEN full-length enriched, 10 days neonate cortex Mus musculus cDNA clone A830086C24 3', mRNA sequence.                                                                  | BB274009  |
| 1454807_a_at | R | 0.877 | Snx12         | sorting nexin 12                                                                                                                                                                   | BB414983  |
| 1416528_at   | R | 0.875 | Sh3bgrl3      | SH3 domain binding glutamic acid-rich protein-like 3                                                                                                                               | NM_080559 |
| 1425674_a_at | R | 0.874 | 1500011L16Rik | RIKEN cDNA 1500011L16 gene                                                                                                                                                         | BC016544  |
| 1423959_at   | R | 0.874 | AV047578      | expressed sequence AV047578                                                                                                                                                        | AF305427  |
| 1427074_at   | P | 2.834 | 5330414D10Rik | L0848C02-3 NIA Mouse Newborn Brain cDNA Library Mus musculus cDNA clone L0848C02 3', mRNA sequence.                                                                                | BM117243  |

|              |   |       |               |                                                                                                                                                                                                                                                                     |           |
|--------------|---|-------|---------------|---------------------------------------------------------------------------------------------------------------------------------------------------------------------------------------------------------------------------------------------------------------------|-----------|
| 1448830_at   | P | 2.578 | Dusp1         | dual specificity phosphatase 1                                                                                                                                                                                                                                      | NM_013642 |
| 1427985_at   | P | 2.541 | 9630042H07Rik | RIKEN cDNA 9630042H07 gene                                                                                                                                                                                                                                          | BC027796  |
| 1450008_a_at | P | 2.365 | Catnb         | catenin beta                                                                                                                                                                                                                                                        | NM_007614 |
| 1437354_at   | P | 2.316 |               | 0 day neonate cerebellum cDNA, RIKEN full-length enriched library, clone:C230091D08 product:unclassifiable, full insert sequence                                                                                                                                    | AI154956  |
| 1415823_at   | P | 2.143 | Scd2          | stearoyl-Coenzyme A desaturase 2                                                                                                                                                                                                                                    | BG060909  |
| 1424766_at   | P | 2.044 | BC004701      | cDNA sequence BC004701                                                                                                                                                                                                                                              | BC004701  |
| 1429144_at   | P | 1.994 | 2310032D16Rik | RIKEN cDNA 2310032D16 gene                                                                                                                                                                                                                                          | AV291259  |
| 1419277_at   | P | 1.984 | Usp31         | ubiquitin specific protease 31                                                                                                                                                                                                                                      | BG068704  |
| 1419529_at   | P | 1.976 | Il23a         | interleukin 23, alpha subunit p19                                                                                                                                                                                                                                   | NM_031252 |
| 1418025_at   | P | 1.969 | Bhlhb2        | basic helix-loop-helix domain containing, class B2                                                                                                                                                                                                                  | NM_011498 |
| 1415996_at   | P | 1.961 | Txnip         | thioredoxin interacting protein                                                                                                                                                                                                                                     | AF173681  |
| 1420922_at   | P | 1.945 | Usp9x         | Similar to ubiquitin specific protease 9, X-linked isoform 2; Drosophila fat facets related, X-linked; ubiquitin specific protease 9, X chromosome (fat facets-like Drosophila) (LOC240170), mRNA                                                                   | AW107303  |
| 1434392_at   | P | 1.930 | Usp34         | U2af1-rs1 region 2                                                                                                                                                                                                                                                  | BM235696  |
| 1429850_x_at | P | 1.921 | 2010004B12Rik | RIKEN cDNA 2010004B12 gene                                                                                                                                                                                                                                          | AK008083  |
| 1415945_at   | P | 1.915 | Mcm5          | minichromosome maintenance deficient 5, cell division cycle 46 ( <i>S. cerevisiae</i> )                                                                                                                                                                             | NM_008566 |
| 1424522_at   | P | 1.912 | BC019693      | cDNA sequence BC019693                                                                                                                                                                                                                                              | BC019693  |
| 1427413_a_at | P | 1.901 | Cugbp1        | unnamed protein product; CUG triplet repeat, RNA binding protein 1 (MGD)MGI:1342295 putative; Mus musculus 14 days embryo liver cDNA, RIKEN full-length enriched library, clone:4432412L08 product:CUG triplet repeat, RNA binding protein 1, full insert sequence. | AK014492  |
| 1426750_at   | P | 1.895 | Flnb          | filamin, beta                                                                                                                                                                                                                                                       | AW538200  |
| 1417363_at   | P | 1.888 | Zfp61         | zinc finger protein 61                                                                                                                                                                                                                                              | NM_009561 |
| 1438809_at   | P | 1.833 | Atp5c1        | ATP synthase, H+ transporting, mitochondrial F1 complex, gamma polypeptide 1                                                                                                                                                                                        | AI644507  |
| 1424723_s_at | P | 1.799 | Cstf3         | cleavage stimulation factor, 3' pre-RNA, subunit 3                                                                                                                                                                                                                  | BC003241  |
| 1425514_at   | P | 1.783 | Pik3r1        | phosphatidylinositol 3-kinase, regulatory subunit, polypeptide 1 (p85 alpha)                                                                                                                                                                                        | M60651    |
| 1435934_at   | P | 1.752 | 9330101J02Rik | RIKEN cDNA 9330101J02 gene                                                                                                                                                                                                                                          | AI643884  |
| 1454686_at   | P | 1.703 | 6430706D22Rik | RIKEN cDNA 6430706D22 gene                                                                                                                                                                                                                                          | BM248225  |
| 1437175_at   | P | 1.696 | BC027088      | cDNA sequence BC027088                                                                                                                                                                                                                                              | BI691129  |
| 1417155_at   | P | 1.691 | Nmyc1         | neuroblastoma myc-related oncogene 1                                                                                                                                                                                                                                | BC005453  |
| 1423828_at   | P | 1.688 | Fasn          | fatty acid synthase                                                                                                                                                                                                                                                 | AF127033  |
| 1460429_at   | P | 1.685 | Cdc5l         | cell division cycle 5-like ( <i>S. pombe</i> )                                                                                                                                                                                                                      | AK004547  |
| 1427490_at   | P | 1.679 | Abcb7         | ATP-binding cassette, sub-family B (MDR/TAP), member 7                                                                                                                                                                                                              | U43892    |
| 1420811_a_at | P | 1.664 | Catnb         | catenin beta                                                                                                                                                                                                                                                        | NM_007614 |
| 1426653_at   | P | 1.645 | Mcm3          | minichromosome maintenance deficient 3 ( <i>S. cerevisiae</i> )                                                                                                                                                                                                     | BI658327  |
| 1424571_at   | P | 1.635 | Ddx46         | DEAD (Asp-Glu-Ala-Asp) box polypeptide 46                                                                                                                                                                                                                           | BF023426  |
| 1448616_at   | P | 1.632 | Dvl2          | dishevelled 2, dsh homolog ( <i>Drosophila</i> )                                                                                                                                                                                                                    | BF466091  |
| 1452519_a_at | P | 1.621 | Zfp36         | unnamed protein product; TIS11 (AA 1 - 183); Mouse TPA-induced TIS11 mRNA.                                                                                                                                                                                          | X14678    |
| 1451959_a_at | P | 1.617 | Vegfa         | vascular endothelial growth factor A                                                                                                                                                                                                                                | U50279    |
| 1456128_at   | P | 1.616 | Atp5g2        | ATP synthase, H+ transporting, mitochondrial F0 complex, subunit c (subunit 9), isoform 2                                                                                                                                                                           | AW413339  |
| 1425326_at   | P | 1.610 | Acly          | ATP citrate lyase                                                                                                                                                                                                                                                   | BI456232  |
| 1449011_at   | P | 1.607 | Slc12a7       | solute carrier family 12, member 7                                                                                                                                                                                                                                  | BB732135  |
| 1433451_at   | P | 1.592 | Cdk5r         | cyclin-dependent kinase 5, regulatory subunit (p35)                                                                                                                                                                                                                 | BB177836  |
| 1454626_at   | P | 1.589 | Cltc          | clathrin, heavy polypeptide (Hc)                                                                                                                                                                                                                                    | BM211219  |
| 1417356_at   | P | 1.579 | Peg3          | paternally expressed 3                                                                                                                                                                                                                                              | AB003040  |
| 1428087_at   | P | 1.573 | Dnm1l         | dynamamin 1-like                                                                                                                                                                                                                                                    | BM249101  |
| 1422967_a_at | P | 1.564 | Tfrc          | transferrin receptor                                                                                                                                                                                                                                                | BB810450  |
| 1421455_at   | P | 1.558 | Sntb1         | syntrophin, basic 1                                                                                                                                                                                                                                                 | NM_016667 |
| 1448420_a_at | P | 1.550 | Fbx12         | F-box and leucine-rich repeat protein 12                                                                                                                                                                                                                            | NM_013911 |

|              |   |       |               |                                                                                                                                                                                                                               |           |
|--------------|---|-------|---------------|-------------------------------------------------------------------------------------------------------------------------------------------------------------------------------------------------------------------------------|-----------|
| 1418768_at   | P | 1.550 | Opa1          | optic atrophy 1 homolog (human)                                                                                                                                                                                               | BC025160  |
| 1460631_at   | P | 1.549 | Ogt           | 602117024T1 Soares_mammary_gland_NMLMG Mus musculus cDNA clone IMAGE:3468509 3', mRNA sequence.                                                                                                                               | BF681886  |
| 1427797_s_at | P | 1.548 |               | 602099052F1 NCI_CGAP_Co24 Mus musculus cDNA clone IMAGE:4219044 5', mRNA sequence.                                                                                                                                            | BF580235  |
| 1427795_s_at | P | 1.534 |               | Clone IMAGE:6494162, mRNA                                                                                                                                                                                                     | BC021394  |
| 1425231_a_at | P | 1.526 | Zfp46         | zinc finger protein 46                                                                                                                                                                                                        | BC006587  |
| 1417380_at   | P | 1.526 | Iqgap1        | IQ motif containing GTPase activating protein 1                                                                                                                                                                               | NM_016721 |
| 1452143_at   | P | 1.524 | Spnb2         | spectrin beta 2                                                                                                                                                                                                               | BQ174069  |
| 1448650_a_at | P | 1.512 | Pole          | polymerase (DNA directed), epsilon                                                                                                                                                                                            | NM_011132 |
| 1428286_at   | P | 1.508 | 2900097C17Rik | 13 days embryo forelimb cDNA, RIKEN full-length enriched library, clone:5930433F13 product:unknown EST, full insert sequence                                                                                                  | AW545056  |
| 1425384_a_at | P | 1.507 | Ube4a         | ubiquitination factor E4A, UFD2 homolog (S. cerevisiae)                                                                                                                                                                       | BC006649  |
| 1421888_x_at | P | 1.496 | Aplp2         | amyloid beta (A4) precursor-like protein 2                                                                                                                                                                                    | M97216    |
| 1452265_at   | P | 1.492 | Clasp1        | CLIP associating protein 1                                                                                                                                                                                                    | AJ288061  |
| 1422581_at   | P | 1.491 | Pias1         | protein inhibitor of activated STAT 1                                                                                                                                                                                         | NM_019663 |
| 1449324_at   | P | 1.489 | Ero1l         | Transcribed sequences                                                                                                                                                                                                         | BM234652  |
| 1452154_at   | P | 1.488 | Iars          | isoleucine-tRNA synthetase                                                                                                                                                                                                    | BE915338  |
| 1455940_x_at | P | 1.488 | Wdr6          | RIKEN cDNA 6330580J24 gene                                                                                                                                                                                                    | BB453609  |
| 1434561_at   | P | 1.484 | Asxl1         | additional sex combs like 1 (Drosophila)                                                                                                                                                                                      | BI648411  |
| 1426677_at   | P | 1.481 | Flna          | filamin, alpha                                                                                                                                                                                                                | BM233746  |
| 1415973_at   | P | 1.465 | Marcks        | myristoylated alanine rich protein kinase C substrate                                                                                                                                                                         | AW546141  |
| 1420971_at   | P | 1.460 | Ubr1          | ubiquitin protein ligase E3 component n-recogin 1                                                                                                                                                                             | BQ173927  |
| 1433804_at   | P | 1.453 | Jak1          | Janus kinase 1                                                                                                                                                                                                                | BQ032637  |
| 1428848_a_at | P | 1.450 | Macf1         | microtubule-actin crosslinking factor 1                                                                                                                                                                                       | BM248206  |
| 1449865_at   | P | 1.450 | Sema3a        | sema domain, immunoglobulin domain (Ig), short basic domain, secreted, (semaphorin) 3A                                                                                                                                        | NM_009152 |
| 1454890_at   | P | 1.446 | Amot          | angiomin                                                                                                                                                                                                                      | BG067039  |
| 1422685_at   | P | 1.446 | Sec8l1        | SEC8-like 1 (S. cerevisiae)                                                                                                                                                                                                   | NM_009148 |
| 1421519_a_at | P | 1.435 | Zfp120        | zinc finger protein 120                                                                                                                                                                                                       | NM_023266 |
| 1448809_at   | P | 1.432 | Cse1l         | chromosome segregation 1-like (S. cerevisiae)                                                                                                                                                                                 | NM_023565 |
| 1426377_at   | P | 1.415 | Zfp281        | Adult male diencephalon cDNA, RIKEN full-length enriched library, clone:9330157H23 product:inferred: Mus musculus, Similar to zinc finger protein 281, clone MGC:7737 IMAGE:3498439, mRNA, complete cds, full insert sequence | AV071650  |
| 1450634_at   | P | 1.408 | Atp6v1a1      | ATPase, H <sup>+</sup> transporting, V1 subunit A, isoform 1                                                                                                                                                                  | NM_007508 |
| 1415899_at   | P | 1.405 | Junb          | Jun-B oncogene                                                                                                                                                                                                                | NM_008416 |
| 1451109_a_at | P | 1.404 | Nedd4         | neural precursor cell expressed, developmentally down-regulted gene 4                                                                                                                                                         | BG073415  |
| 1428847_a_at | P | 1.403 | Macf1         | microtubule-actin crosslinking factor 1                                                                                                                                                                                       | BM248206  |
| 1419647_a_at | P | 1.403 | Ier3          | immediate early response 3                                                                                                                                                                                                    | NM_133662 |
| 1416129_at   | P | 1.391 | 1300002F13Rik | RIKEN cDNA 1300002F13 gene                                                                                                                                                                                                    | NM_133753 |
| 1421333_a_at | P | 1.390 | Mynn          | myoneurin                                                                                                                                                                                                                     | AK019238  |
| 1425188_s_at | P | 1.387 | Sel1h         | Sel1 (suppressor of lin-12) 1 homolog (C. elegans)                                                                                                                                                                            | BC026816  |
| 1417570_at   | P | 1.380 | Anapc1        | anaphase promoting complex subunit 1                                                                                                                                                                                          | NM_008569 |
| 1415758_at   | P | 1.377 | 2010313D22Rik | RIKEN cDNA 2510002A14 gene                                                                                                                                                                                                    | BM118442  |
| 1454789_x_at | P | 1.372 | 2610031L17Rik | RIKEN cDNA 2610031L17 gene                                                                                                                                                                                                    | BB085604  |
| 1418023_at   | P | 1.366 | Narg1         | NMDA receptor-regulated gene 1                                                                                                                                                                                                | BG067031  |
| 1423645_a_at | P | 1.363 | Ddx5          | DEAD (Asp-Glu-Ala-Asp) box polypeptide 5                                                                                                                                                                                      | BC009142  |
| 1453260_a_at | P | 1.362 | Ppp2r2a       | protein phosphatase 2 (formerly 2A), regulatory subunit B (PR 52), alpha isoform                                                                                                                                              | AK010380  |
| 1430533_a_at | P | 1.351 | Catnb         | catenin beta                                                                                                                                                                                                                  | BI134907  |
| 1427407_s_at | P | 1.347 |               | RIKEN cDNA 6030460N08 gene                                                                                                                                                                                                    | AV013785  |
| 1427456_at   | P | 1.346 | Wdfy3         | WD repeat and FYVE domain containing 3                                                                                                                                                                                        | BF150771  |
| 1430527_a_at | P | 1.344 | 5730408C10Rik | RIKEN cDNA 5730408C10 gene                                                                                                                                                                                                    | AK017523  |
| 1451847_s_at | P | 1.330 | Arid4b        | AT rich interactive domain 4B (Rbp1 like)                                                                                                                                                                                     | BC024724  |

|              |   |       |               |                                                                                                                                     |           |
|--------------|---|-------|---------------|-------------------------------------------------------------------------------------------------------------------------------------|-----------|
| 1417592_at   | P | 1.330 | Frap1         | FK506 binding protein 12-rapamycin associated protein 1                                                                             | NM_020009 |
| 1434846_at   | P | 1.323 | 1700065A05Rik | RIKEN cDNA 1700065A05 gene                                                                                                          | AW557010  |
| 1460240_a_at | P | 1.313 | Hnrpc         | heterogeneous nuclear ribonucleoprotein C                                                                                           | NM_016884 |
| 1422539_at   | P | 1.306 | Extl2         | extotoses (multiple)-like 2                                                                                                         | BM203810  |
| 1456615_a_at | P | 1.305 | Falz          | vx16a10.r1 Soares_thymus_2NbMT Mus musculus cDNA clone IMAGE:1264602 5', mRNA sequence.                                             | AA867746  |
| 1448127_at   | P | 1.304 | Rrm1          | ribonucleotide reductase M1                                                                                                         | BB758819  |
| 1437349_at   | P | 1.304 | 4930432B04Rik | RIKEN cDNA 4930432B04 gene                                                                                                          | BE951922  |
| 1423711_at   | P | 1.300 | Ndufaf1       | NADH dehydrogenase (ubiquinone) 1 alpha subcomplex, assembly factor 1                                                               | BC018422  |
| 1448497_at   | P | 1.297 | Ercc3         | excision repair cross-complementing rodent repair deficiency, complementation group 3                                               | NM_133658 |
| 1427140_at   | P | 1.297 | Pvt1          | H2A histone family, member Y2                                                                                                       | BE956863  |
| 1423430_at   | P | 1.296 | Mybbp1a       | cDNA sequence BC011467                                                                                                              | AW228043  |
| 1417279_at   | P | 1.289 | Itpr1         | inositol 1,4,5-triphosphate receptor 1                                                                                              | NM_010585 |
| 1455372_at   | P | 1.288 | Cpeb3         | cytoplasmic polyadenylation element binding protein 3                                                                               | BB770826  |
| 1415916_a_at | P | 1.285 | Mthfd1        | methylenetetrahydrofolate dehydrogenase (NADP+ dependent), methenyltetrahydrofolate cyclohydrolase, formyltetrahydrofolate synthase | NM_138745 |
| 1425721_at   | P | 1.283 | Phip          | pleckstrin homology domain interacting protein                                                                                      | BI737352  |
| 1419356_at   | P | 1.282 | Klf7          | Kruppel-like factor 7 (ubiquitous)                                                                                                  | BB524597  |
| 1425702_a_at | P | 1.280 | Enpp5         | ectonucleotide pyrophosphatase/phosphodiesterase 5                                                                                  | BC011294  |
| 1427199_at   | P | 1.279 | 2510002A14Rik | RIKEN cDNA 2510002A14 gene                                                                                                          | BM118442  |
| 1419392_at   | P | 1.278 | Pclo          | piccolo (presynaptic cytomatrix protein)                                                                                            | NM_011995 |
| 1423086_at   | P | 1.275 | Npc1          | RIKEN cDNA 2400010D15 gene                                                                                                          | BB769209  |
| 1448566_at   | P | 1.273 | Slc40a1       | solute carrier family 40 (iron-regulated transporter), member 1                                                                     | AF226613  |
| 1425206_a_at | P | 1.269 | 0610009M14Rik | BB224620 RIKEN full-length enriched, adult male aorta and vein Mus musculus cDNA clone A530087G20 3', mRNA sequence.                | BB224620  |
| 1455958_s_at | P | 1.267 | 9130017A15Rik | RIKEN cDNA 9130017A15 gene                                                                                                          | AI881989  |
| 1418019_at   | P | 1.267 | Cpd           | carboxypeptidase D                                                                                                                  | NM_007754 |
| 1452496_at   | P | 1.255 | Atp11c        | RIKEN cDNA A330005H02 gene                                                                                                          | AI593492  |
| 1425187_at   | P | 1.251 | Sel1h         | Sel1 (suppressor of lin-12) 1 homolog (C. elegans)                                                                                  | BC026816  |
| 1448135_at   | P | 1.247 | Atf4          | activating transcription factor 4                                                                                                   | M94087    |
| 1421229_at   | P | 1.244 | Dffb          | DNA fragmentation factor, beta subunit                                                                                              | NM_007859 |
| 1420557_at   | P | 1.236 | Epha5         | Eph receptor A5                                                                                                                     | NM_007937 |
| 1455990_at   | P | 1.231 | Kif23         | kinesin family member 23                                                                                                            | AW986176  |
| 1419099_x_at | P | 1.230 | Epb7.2        | erythrocyte protein band 7.2                                                                                                        | AF093620  |
| 1425767_a_at | P | 1.228 | Six4          | sine oculis-related homeobox 4 homolog (Drosophila)                                                                                 | D50416    |
| 1448116_at   | P | 1.225 | Ube1x         | ubiquitin-activating enzyme E1, Chr X                                                                                               | NM_009457 |
| 1449138_at   | P | 1.222 | Sf3b1         | splicing factor 3b, subunit 1                                                                                                       | BE951504  |
| 1418288_at   | P | 1.219 | Lpin1         | lipin 1                                                                                                                             | NM_015763 |
| 1450162_at   | P | 1.219 | Dpf3          | D4, zinc and double PHD fingers, family 3                                                                                           | NM_058212 |
| 1422430_at   | P | 1.212 | Fignl1        | fidgetin-like 1                                                                                                                     | NM_021891 |
| 1421144_at   | P | 1.207 | Rpgrip1       | retinitis pigmentosa GTPase regulator interacting protein 1                                                                         | NM_023879 |
| 1419638_at   | P | 1.201 | Efnb2         | ephrin B2                                                                                                                           | U30244    |
| 1416062_at   | P | 1.196 | Tbc1d15       | TBC1 domain family, member 15                                                                                                       | BF577643  |
| 1415971_at   | P | 1.192 | Marcks        | myristoylated alanine rich protein kinase C substrate                                                                               | AW546141  |
| 1434674_at   | P | 1.191 | Lyst          | lysosomal trafficking regulator                                                                                                     | BB463428  |
| 1425516_at   | P | 1.189 | Ogt           | O-linked N-acetylglucosamine (GlcNAc) transferase (UDP-N-acetylglucosamine:polypeptide-N-acetylglucosaminyl transferase)            | AF363030  |
| 1437203_at   | P | 1.185 | Cbl1          | Casitas B-lineage lymphoma-like 1                                                                                                   | BB460904  |
| 1424988_at   | P | 1.184 | Myliip        | myosin regulatory light chain interacting protein                                                                                   | BC010206  |
| 1450021_at   | P | 1.182 | Ubqln2        | ubiquilin 2                                                                                                                         | AV171029  |
| 1421889_a_at | P | 1.180 | Aplp2         | amyloid beta (A4) precursor-like protein 2                                                                                          | M97216    |
| 1418727_at   | P | 1.180 | Nup155        | nucleoporin 155                                                                                                                     | BG073833  |

|              |   |       |               |                                                                                                                              |           |
|--------------|---|-------|---------------|------------------------------------------------------------------------------------------------------------------------------|-----------|
| 1424617_at   | P | 1.178 | Ifi35         | interferon-induced protein 35                                                                                                | BC008158  |
| 1415997_at   | P | 1.170 | Txnip         | thioredoxin interacting protein                                                                                              | AF173681  |
| 1426814_at   | P | 1.168 | AU024582      | hypothetical protein MGC38812                                                                                                | BM248309  |
| 1417379_at   | P | 1.168 | Iqgap1        | IQ motif containing GTPase activating protein 1                                                                              | NM_016721 |
| 1456005_a_at | P | 1.167 | Bcl2l11       | BCL2-like 11 (apoptosis facilitator)                                                                                         | BB667581  |
| 1454904_at   | P | 1.166 |               | 602846904F1 NCI_CGAP_Mam6 Mus musculus cDNA clone IMAGE:4977457 5', mRNA sequence.                                           | BG976607  |
| 1424515_at   | P | 1.162 |               | BB440272 RIKEN full-length enriched, 9 days embryo Mus musculus cDNA clone D030020O16 3', mRNA sequence.                     | BB440272  |
| 1422198_a_at | P | 1.160 | Shmt1         | serine hydroxymethyl transferase 1 (soluble)                                                                                 | NM_009171 |
| 1423030_at   | P | 1.153 | Vcp           | Transcribed sequence with strong similarity to protein ref:NP_009057.1 (H.sapiens) valosin-containing protein [Homo sapiens] | AI195225  |
| 1420628_at   | P | 1.145 | Pura          | purine rich element binding protein A                                                                                        | NM_008989 |
| 1423919_at   | P | 1.133 | BC023882      | cDNA sequence BC023882                                                                                                       | BC027393  |
| 1418597_at   | P | 1.128 | Top3a         | topoisomerase (DNA) III alpha                                                                                                | NM_009410 |
| 1455899_x_at | P | 1.127 | Socs3         | suppressor of cytokine signaling 3                                                                                           | BB241535  |
| 1422621_at   | P | 1.126 | Ranbp2        | RAN binding protein 2                                                                                                        | BM507707  |
| 1426895_at   | P | 1.124 | Zfp191        | BB579760 RIKEN full-length enriched, 1 day pregnant adult female ovary Mus musculus cDNA clone 7230402O10 5', mRNA sequence. | BB579760  |
| 1452448_at   | P | 1.119 | Aqr           | aquarius                                                                                                                     | BE573695  |
| 1450034_at   | P | 1.119 | Stat1         | signal transducer and activator of transcription 1                                                                           | AW214029  |
| 1417019_a_at | P | 1.119 | Cdc6          | cell division cycle 6 homolog (S. cerevisiae)                                                                                | NM_011799 |
| 1450396_at   | P | 1.119 | Stag2         | stromal antigen 2                                                                                                            | NM_021465 |
| 1423431_a_at | P | 1.117 | Mybbp1a       | cDNA sequence BC011467                                                                                                       | AW228043  |
| 1451738_at   | P | 1.111 | Ogt           | O-linked N-acetylglucosamine (GlcNAc) transferase (UDP-N-acetylglucosamine:polypeptide-N-acetylglucosaminyl transferase)     | AF363030  |
| 1437752_at   | P | 1.108 | Lin28         | BB706377 RIKEN full-length enriched, in vitro fertilized eggs Mus musculus cDNA clone 7420489F16 3', mRNA sequence.          | BB706377  |
| 1421395_at   | P | 1.108 | Zik1          | zinc finger protein interacting with K protein 1                                                                             | NM_009577 |
| 1426957_at   | P | 1.101 | Trp53bp1      | transformation related protein 53 binding protein 1                                                                          | AJ414734  |
| 1435862_at   | P | 1.097 | Son           | Son cell proliferation protein                                                                                               | BG067046  |
| 1452099_at   | P | 1.097 | AA408296      | expressed sequence AA408296                                                                                                  | BG070043  |
| 1424229_at   | P | 1.096 | Dyrk3         | dual-specificity tyrosine-(Y)-phosphorylation regulated kinase 3                                                             | BC006704  |
| 1428105_at   | P | 1.091 | 2610005B21Rik | RIKEN cDNA 2610005B21 gene                                                                                                   | AK011311  |
| 1450700_at   | P | 1.088 | Cdc42ep3      | CDC42 effector protein (Rho GTPase binding) 3                                                                                | BB012489  |
| 1451137_a_at | P | 1.085 | Brd8          | bromodomain containing 8                                                                                                     | BC025644  |
| 1433834_at   | P | 1.085 | F830029L24Rik | RIKEN cDNA F830029L24 gene                                                                                                   | BQ176049  |
| 1423975_s_at | P | 1.084 | 6720401E04Rik | expressed sequence AL022610                                                                                                  | BC006631  |
| 1427888_a_at | P | 1.081 | Spna2         | spectrin alpha 2                                                                                                             | AK011566  |
| 1438808_at   | P | 1.080 | Trp53         | transformation related protein 53                                                                                            | BB450072  |
| 1460409_at   | P | 1.080 | Cpt1a         | carnitine palmitoyltransferase 1a, liver                                                                                     | AI987925  |
| 1451459_at   | P | 1.080 | Elys          | embryonic large molecule derived from yolk sac                                                                               | BC023122  |
| 1418022_at   | P | 1.076 | Narg1         | NMDA receptor-regulated gene 1                                                                                               | BG067031  |
| 1449548_at   | P | 1.075 | Efnb2         | ephrin B2                                                                                                                    | U30244    |
| 1415811_at   | P | 1.073 | Uhrf1         | ubiquitin-like, containing PHD and RING finger domains, 1                                                                    | BB702754  |
| 1451432_x_at | P | 1.070 | 2010004B12Rik | RIKEN cDNA 2010004B12 gene                                                                                                   | BC022729  |
| 1427143_at   | P | 1.060 | Jarid1b       | jumonji, AT rich interactive domain 1B (Rbp2 like)                                                                           | BC019446  |
| 1436859_at   | P | 1.060 | 2700007P21Rik | RIKEN cDNA 2700007P21 gene                                                                                                   | AV342631  |
| 1449414_at   | P | 1.058 | Zfp53         | Zinc finger protein 118                                                                                                      | NM_013843 |
| 1450773_at   | P | 1.056 | Kcnd2         | potassium voltage-gated channel, Shal-related family, member 2                                                               | BB051684  |
| 1435369_at   | P | 1.054 | C78212        | RIKEN cDNA C330018L13 gene                                                                                                   | BM244352  |
| 1417792_at   | P | 1.054 | Np220         | nuclear protein 220                                                                                                          | BM238431  |
| 1438418_at   | P | 1.049 | 4932432K03Rik | RIKEN cDNA 4932432K03 gene                                                                                                   | BB536931  |

|              |   |       |               |                                                                                                                                 |           |
|--------------|---|-------|---------------|---------------------------------------------------------------------------------------------------------------------------------|-----------|
| 1428225_s_at | P | 1.048 | Hnrpd1        | heterogeneous nuclear ribonucleoprotein D-like                                                                                  | AV101245  |
| 1435114_at   | P | 1.047 | D630024B06Rik | RIKEN cDNA D630024B06 gene                                                                                                      | C77437    |
| 1415703_at   | P | 1.046 | Ureb1         | upstream regulatory element binding protein 1e                                                                                  | BM248615  |
| 1424516_at   | P | 1.045 |               | BB440272 RIKEN full-length enriched, 9 days embryo Mus musculus cDNA clone D030020O16 3', mRNA sequence.                        | BB440272  |
| 1426804_at   | P | 1.045 | Smarca4       | SWI/SNF related, matrix associated, actin dependent regulator of chromatin, subfamily a, member 4                               | AW701251  |
| 1426842_at   | P | 1.042 | 9130022A11Rik | RIKEN cDNA 9130022A11 gene                                                                                                      | BB183208  |
| 1448325_at   | P | 1.041 | Myd116        | myeloid differentiation primary response gene 116                                                                               | NM_008654 |
| 1426002_a_at | P | 1.039 | Cdc7          | cell division cycle 7 ( <i>S. cerevisiae</i> )                                                                                  | AB018574  |
| 1422248_at   | P | 1.033 | Irs4          | insulin receptor substrate 4                                                                                                    | NM_010572 |
| 1451254_at   | P | 1.032 | Ikbkap        | inhibitor of kappa light polypeptide enhancer in B-cells, kinase complex-associated protein                                     | AF367244  |
| 1425463_at   | P | 1.032 | Gata6         | GATA binding protein 6                                                                                                          | BM214048  |
| 1424144_at   | P | 1.030 | Ris2          | retroviral integration site 2                                                                                                   | AF477481  |
| 1438211_s_at | P | 1.029 | Dbp           | BB550183 RIKEN full-length enriched, 2 days pregnant adult female oviduct Mus musculus cDNA clone E230020M14 3', mRNA sequence. | BB550183  |
| 1427321_s_at | P | 1.028 | Cxadr         | coxsackievirus and adenovirus receptor                                                                                          | AK004908  |
| 1433946_at   | P | 1.028 | Zik1          | zinc finger protein interacting with K protein 1                                                                                | BE824681  |
| 1421131_a_at | P | 1.028 | Zfp111        | zinc finger protein 111                                                                                                         | AV174549  |
| 1416250_at   | P | 1.027 | Btg2          | B-cell translocation gene 2, anti-proliferative                                                                                 | NM_007570 |
| 1456302_at   | P | 1.023 | Pex6          | Transcribed sequence with moderate similarity to protein sp:Q13608 ( <i>H.sapiens</i> ) PEX6_HUMAN Peroxisome assembly factor-2 | BB252740  |
| 1427923_at   | P | 1.023 | Zmpste24      | zinc metalloproteinase, STE24 homolog ( <i>S. cerevisiae</i> )                                                                  | BM233793  |
| 1426878_at   | P | 1.021 | 2610016F04Rik | RIKEN cDNA 2610016F04 gene                                                                                                      | AK020971  |
| 1435122_x_at | P | 1.019 | Dnmt1         | DNA methyltransferase (cytosine-5) 1                                                                                            | BB165431  |
| 1452002_at   | P | 1.018 | BC024969      | cDNA sequence BC024969                                                                                                          | BC024969  |
| 1427949_at   | P | 1.017 | Zfp294        | zinc finger protein 294                                                                                                         | BM231649  |
| 1419354_at   | P | 1.017 | Klf7          | Kruppel-like factor 7 (ubiquitous)                                                                                              | BB524597  |
| 1418109_at   | P | 1.015 | Gspt2         | G1 to phase transition 2                                                                                                        | NM_008179 |
| 1455534_s_at | P | 1.009 | Osbp11        | oxysterol binding protein-like 11                                                                                               | BM220135  |
| 1421955_a_at | P | 1.008 | Nedd4         | neural precursor cell expressed, developmentally down-regulated gene 4                                                          | NM_010890 |
| 1425095_at   | P | 1.007 | BC002059      | cDNA sequence BC002059                                                                                                          | BC002059  |
| 1427906_at   | P | 1.004 | 1110037F02Rik | RIKEN cDNA 1110037F02 gene                                                                                                      | AK012768  |
| 1422453_at   | P | 1.003 | Prpf8         | pre-mRNA processing factor 8                                                                                                    | NM_138659 |
| 1436480_at   | P | 1.001 | Dpp7          | dipeptidylpeptidase 7                                                                                                           | BB746075  |
| 1448086_at   | P | 1.001 | D1Ert164e     | Transcribed sequences                                                                                                           | BG079429  |
| 1450163_a_at | P | 1.000 | Wrn           | Werner syndrome homolog (human)                                                                                                 | D86527    |
| 1424738_at   | P | 0.999 | 4932432K03Rik | RIKEN cDNA 4932432K03 gene                                                                                                      | BE288551  |
| 1433924_at   | P | 0.998 | Peg3          | paternally expressed 3                                                                                                          | BM200248  |
| 1454157_a_at | P | 0.994 | Pla2g2d       | phospholipase A2, group IID                                                                                                     | AK004232  |
| 1423550_at   | P | 0.993 | Slc1a4        | solute carrier family 1 (glutamate/neutral amino acid transporter), member 4                                                    | BB277461  |
| 1452315_at   | P | 0.992 | Kif11         | kinesin family member 11                                                                                                        | BB827235  |
| 1452843_at   | P | 0.991 | Il6st         | interleukin 6 signal transducer                                                                                                 | AK017211  |
| 1450690_at   | P | 0.989 | Ranbp2        | RAN binding protein 2                                                                                                           | BM507707  |
| 1422720_at   | P | 0.989 | Isl1          | UI-M-DJ2-bwa-g-01-0-UI.s1 NIH_BMAP_DJ2 Mus musculus cDNA clone UI-M-DJ2-bwa-g-01-0-UI 3', mRNA sequence.                        | BQ176915  |
| 1451828_a_at | P | 0.988 | Acsl4         | fatty acid-Coenzyme A ligase, long chain 4                                                                                      | AB033886  |
| 1423945_a_at | P | 0.988 | Pkig          | protein kinase inhibitor, gamma                                                                                                 | BC026550  |
| 1431337_a_at | P | 0.986 | 1810055E12Rik | RIKEN cDNA 1810055E12 gene                                                                                                      | AK004643  |
| 1417685_at   | P | 0.984 | Ankfy1        | ankyrin repeat and FYVE domain containing 1                                                                                     | NM_009671 |
| 1427334_s_at | P | 0.983 | 2810474O19Rik | RIKEN cDNA 2810474O19 gene                                                                                                      | BE196832  |
| 1420295_x_at | P | 0.981 | T25545        | chloride channel 5                                                                                                              | T25545    |
| 1451274_at   | P | 0.979 | Ogdh          | oxoglutarate dehydrogenase (lipoamide)                                                                                          | BC013670  |



|              |   |       |               |                                                                                                                                                                                                                                                                                                                                            |           |
|--------------|---|-------|---------------|--------------------------------------------------------------------------------------------------------------------------------------------------------------------------------------------------------------------------------------------------------------------------------------------------------------------------------------------|-----------|
| 1415985_at   | P | 0.978 | D8Ert633e     | DNA segment, Chr 8, ERATO Doi 633, expressed                                                                                                                                                                                                                                                                                               | NM_133953 |
| 1449669_at   | P | 0.976 | E130318E12Rik | RIKEN cDNA E130318E12 gene                                                                                                                                                                                                                                                                                                                 | AW549708  |
| 1422663_at   | P | 0.976 | Orc1l         | origin recognition complex, subunit 1-like ( <i>S.cerevisiae</i> )                                                                                                                                                                                                                                                                         | BC015073  |
| 1425517_s_at | P | 0.974 | Ogt           | O-linked N-acetylglucosamine (GlcNAc) transferase (UDP-N-acetylglucosamine:polypeptide-N-acetylglucosaminyl transferase)                                                                                                                                                                                                                   | AF363030  |
| 1426817_at   | P | 0.974 | Mki67         | antigen identified by monoclonal antibody Ki 67                                                                                                                                                                                                                                                                                            | X82786    |
| 1417131_at   | P | 0.973 | Cdc25a        | C76119 Mouse 3.5-dpc blastocyst cDNA <i>Mus musculus</i> cDNA clone J0003H02 3' similar to Rat mRNA for cdc25A, mRNA sequence.                                                                                                                                                                                                             | C76119    |
| 1450108_at   | P | 0.970 | C630002N23Rik | kinesin family member 1A                                                                                                                                                                                                                                                                                                                   | NM_008440 |
| 1448361_at   | P | 0.970 | Ttc3          | tetratricopeptide repeat domain 3                                                                                                                                                                                                                                                                                                          | BB833716  |
| 1436300_at   | P | 0.967 | C430014H23Rik | RIKEN cDNA A930019K20 gene                                                                                                                                                                                                                                                                                                                 | BB435342  |
| 1452611_at   | P | 0.966 | Zfp294        | zinc finger protein 294                                                                                                                                                                                                                                                                                                                    | BM231649  |
| 1416791_a_at | P | 0.966 | Nxf1          | nuclear RNA export factor 1 homolog ( <i>S. cerevisiae</i> )                                                                                                                                                                                                                                                                               | BC005594  |
| 1453550_a_at | P | 0.961 | 3732409C05Rik | RIKEN cDNA 3732409C05 gene                                                                                                                                                                                                                                                                                                                 | AK011187  |
| 1452385_at   | P | 0.960 | AA939927      | expressed sequence AA939927                                                                                                                                                                                                                                                                                                                | BG076275  |
| 1451317_at   | P | 0.960 | 9430020E02Rik | RIKEN cDNA 9430020E02 gene                                                                                                                                                                                                                                                                                                                 | BB455932  |
| 1426380_at   | P | 0.960 | Eif4b         | RIKEN cDNA 2310046H11 gene                                                                                                                                                                                                                                                                                                                 | AW741459  |
| 1426068_at   | P | 0.957 | Slc7a4        | solute carrier family 7 (cationic amino acid transporter, y+ system), member 4                                                                                                                                                                                                                                                             | BC016100  |
| 1419397_at   | P | 0.955 | Pola1         | polymerase (DNA directed), alpha 1                                                                                                                                                                                                                                                                                                         | NM_008892 |
| 1421881_a_at | P | 0.954 | Elavl2        | ELAV (embryonic lethal, abnormal vision, <i>Drosophila</i> )-like 2 (Hu antigen B)                                                                                                                                                                                                                                                         | BB105998  |
| 1449099_at   | P | 0.953 | Lrba          | LPS-responsive beige-like anchor                                                                                                                                                                                                                                                                                                           | NM_030695 |
| 1448952_at   | P | 0.948 | A030009H04Rik | RIKEN cDNA A030009H04 gene                                                                                                                                                                                                                                                                                                                 | AK002962  |
| 1426815_s_at | P | 0.947 | AU024582      | hypothetical protein MGC38812                                                                                                                                                                                                                                                                                                              | BM248309  |
| 1448155_at   | P | 0.947 | Pdcd6ip       | programmed cell death 6 interacting protein                                                                                                                                                                                                                                                                                                | BC026823  |
| 1426117_a_at | P | 0.946 | Slc19a2       | solute carrier family 19 (thiamine transporter), member 2                                                                                                                                                                                                                                                                                  | AF326916  |
| 1421698_a_at | P | 0.946 | Col19a1       | procollagen, type XIX, alpha 1                                                                                                                                                                                                                                                                                                             | NM_007733 |
| 1424252_at   | P | 0.944 | Hnrpd1        | heterogeneous nuclear ribonucleoprotein D-like                                                                                                                                                                                                                                                                                             | BC021374  |
| 1420617_at   | P | 0.941 | Cpeb4         | cytoplasmic polyadenylation element binding protein 4                                                                                                                                                                                                                                                                                      | NM_026252 |
| 1424750_at   | P | 0.939 | Zbtb1         | zinc finger and BTB domain containing 1                                                                                                                                                                                                                                                                                                    | BC012239  |
| 1436908_at   | P | 0.939 | Pcm1          | pericentriolar material 1                                                                                                                                                                                                                                                                                                                  | BG076129  |
| 1418443_at   | P | 0.937 | Xpo1          | exportin 1, CRM1 homolog (yeast)                                                                                                                                                                                                                                                                                                           | BC025628  |
| 1422630_at   | P | 0.936 | Rad50         | RAD50 homolog ( <i>S. cerevisiae</i> )                                                                                                                                                                                                                                                                                                     | NM_009012 |
| 1425617_at   | P | 0.935 | Dhx9          | DEAH (Asp-Glu-Ala-His) box polypeptide 9                                                                                                                                                                                                                                                                                                   | U91922    |
| 1425242_at   | P | 0.934 | 1810006K21Rik | RIKEN cDNA 1810006K21 gene                                                                                                                                                                                                                                                                                                                 | BC024923  |
| 1430692_a_at | P | 0.934 | Sel1h         | Sel1 (suppressor of lin-12) 1 homolog ( <i>C. elegans</i> )                                                                                                                                                                                                                                                                                | AK005023  |
| 1416061_at   | P | 0.933 | Tbc1d15       | TBC1 domain family, member 15                                                                                                                                                                                                                                                                                                              | BF577643  |
| 1429745_at   | P | 0.932 | F8a           | unnamed protein product; putative weakly similar to UBE-1C2 [ <i>Mus musculus</i> ] (SPTR Q9R1R7, evidence: FASTY, 48.7%ID, 99.2%length, match=783); <i>Mus musculus</i> adult female placenta cDNA, RIKEN full-length enriched library, clone:1600013E24 product:weakly similar to UBE-1C2 [ <i>Mus musculus</i> ], full insert sequence. | AK005439  |
| 1450061_at   | P | 0.929 | Enc1          | ectodermal-neural cortex 1                                                                                                                                                                                                                                                                                                                 | BM120053  |
| 1459885_s_at | P | 0.929 | D13Ert6332e   | cytochrome c oxidase, subunit VIIIc                                                                                                                                                                                                                                                                                                        | AA190297  |
| 1416041_at   | P | 0.921 | Sgk           | serum/glucocorticoid regulated kinase                                                                                                                                                                                                                                                                                                      | NM_011361 |
| 1417066_at   | P | 0.920 | Cabc1         | chaperone, ABC1 activity of bc1 complex like ( <i>S. pombe</i> )                                                                                                                                                                                                                                                                           | AK014605  |
| 1426379_at   | P | 0.918 | Eif4b         | RIKEN cDNA 2310046H11 gene                                                                                                                                                                                                                                                                                                                 | AW741459  |
| 1449510_at   | P | 0.917 | Zfp467        | zinc finger protein 467                                                                                                                                                                                                                                                                                                                    | NM_020589 |
| 1455740_at   | P | 0.917 | Hnrpa1        | heterogeneous nuclear ribonucleoprotein A1                                                                                                                                                                                                                                                                                                 | BE685966  |
| 1420520_x_at | P | 0.917 | Eral1         | Era (G-protein)-like 1 ( <i>E. coli</i> )                                                                                                                                                                                                                                                                                                  | NM_022313 |
| 1454633_at   | P | 0.912 | Etnk1         | ethanolamine kinase 1                                                                                                                                                                                                                                                                                                                      | BG066916  |
| 1433552_a_at | P | 0.910 | Polr2b        | polymerase (RNA) II (DNA directed) polypeptide B                                                                                                                                                                                                                                                                                           | BQ177004  |

|              |   |       |               |                                                                                                                                                                                                                                                                                                                                                                                                         |           |
|--------------|---|-------|---------------|---------------------------------------------------------------------------------------------------------------------------------------------------------------------------------------------------------------------------------------------------------------------------------------------------------------------------------------------------------------------------------------------------------|-----------|
| 1449293_a_at | P | 0.909 | Skp2          | AV259620 RIKEN full-length enriched, adult male testis (DH10B) <i>Mus musculus</i> cDNA clone 4930405J03 3' similar to AF083215 <i>Mus musculus</i> SCF complex protein Skp2 mRNA, mRNA sequence.                                                                                                                                                                                                       | AV259620  |
| 1421064_at   | P | 0.905 | Mpp5          | membrane protein, palmitoylated 5 (MAGUK p55 subfamily member 5)                                                                                                                                                                                                                                                                                                                                        | AW258373  |
| 1455904_at   | P | 0.904 | Gas5          | growth arrest specific 5                                                                                                                                                                                                                                                                                                                                                                                | BI650268  |
| 1451688_s_at | P | 0.902 | Entpd8        | ectonucleoside triphosphate diphosphohydrolase 6                                                                                                                                                                                                                                                                                                                                                        | BC020003  |
| 1422094_a_at | P | 0.901 | 2810439M05Rik | RIKEN cDNA 2810439M05 gene                                                                                                                                                                                                                                                                                                                                                                              | NM_026046 |
| 1421070_at   | P | 0.897 | D3ErtD300e    | DNA segment, Chr 3, ERATO Doi 300, expressed                                                                                                                                                                                                                                                                                                                                                            | NM_019995 |
| 1425650_at   | P | 0.896 | Tle4          | transducin-like enhancer of split 4, homolog of <i>Drosophila</i> E(spl)                                                                                                                                                                                                                                                                                                                                | AF229633  |
| 1426956_a_at | P | 0.895 | Trp53bp1      | transformation related protein 53 binding protein 1                                                                                                                                                                                                                                                                                                                                                     | AJ414734  |
| 1460562_at   | P | 0.894 | 6030468D11Rik | RIKEN cDNA 6030468D11 gene                                                                                                                                                                                                                                                                                                                                                                              | BB042938  |
| 1427737_a_at | P | 0.892 | 1200011M11Rik | RIKEN cDNA 1200011M11 gene                                                                                                                                                                                                                                                                                                                                                                              | BC002247  |
| 1460203_at   | P | 0.889 | Itpr1         | inositol 1,4,5-triphosphate receptor 1                                                                                                                                                                                                                                                                                                                                                                  | NM_010585 |
| 1417254_at   | P | 0.887 | Spata5        | spermatogenesis associated 5                                                                                                                                                                                                                                                                                                                                                                            | NM_021343 |
| 1426641_at   | P | 0.887 | Trib2         | expressed sequence AW319517                                                                                                                                                                                                                                                                                                                                                                             | BB354684  |
| 1430571_s_at | P | 0.885 | 2410153K17Rik | unnamed protein product; hypothetical Armadillo repeat/Armadillo/plakoglobin ARM repeat profile containing protein (InterPro IPR000225, PROSITE PS50176, evidence: InterPro) putative; <i>Mus musculus</i> ES cells cDNA, RIKEN full-length enriched library, clone:2410153K17 product:hypothetical Armadillo repeat/Armadillo/plakoglobin ARM repeat profile containing protein, full insert sequence. | AK010815  |
| 1452316_at   | P | 0.884 | 1110020M19Rik | RIKEN cDNA 1110020M19 gene                                                                                                                                                                                                                                                                                                                                                                              | AK003874  |
| 1426896_at   | P | 0.881 | Zfp191        | BB579760 RIKEN full-length enriched, 1 day pregnant adult female ovary <i>Mus musculus</i> cDNA clone 7230402O10 5', mRNA sequence.                                                                                                                                                                                                                                                                     | BB579760  |
| 1435690_at   | P | 0.878 | 9030624J02Rik | RIKEN cDNA 9030624J02 gene                                                                                                                                                                                                                                                                                                                                                                              | BB476775  |
| 1426288_at   | P | 0.878 | Lrp4          | RIKEN cDNA 6430526J12 gene                                                                                                                                                                                                                                                                                                                                                                              | AF247637  |
| 1438637_x_at | P | 0.877 | Sf3b2         | AV305279 RIKEN full-length enriched, 8 days embryo <i>Mus musculus</i> cDNA clone 5730526P08 3', mRNA sequence.                                                                                                                                                                                                                                                                                         | AV305279  |
| 1433685_a_at | P | 0.875 | 6430706D22Rik | RIKEN cDNA 6430706D22 gene                                                                                                                                                                                                                                                                                                                                                                              | BM248225  |
| 1433685_a_at | P | 0.875 | 6430706D22Rik | RIKEN cDNA 6430706D22 gene                                                                                                                                                                                                                                                                                                                                                                              | BM248225  |

<sup>a</sup> Five probes included by Affymetrix as controls were removed from this list

<sup>b</sup> Movement into the RNP pool (R) or polysome pool (P)

**TABLE S2. Genes identified by SAM<sup>a</sup>**

| Probe        | q.value | Gene          | Description                                                                                                                                     | Accession |
|--------------|---------|---------------|-------------------------------------------------------------------------------------------------------------------------------------------------|-----------|
| 1418255_s_at | 0.0744  | Srf           | serum response factor                                                                                                                           | BI662291  |
| 1422586_at   | 0.0744  | Ecel1         | endothelin converting enzyme-like 1                                                                                                             | NM_021306 |
| 1427985_at   | 0.0744  | 9630042H07Rik | RIKEN cDNA 9630042H07 gene                                                                                                                      | BC027796  |
| 1418256_at   | 0.1116  | Srf           | serum response factor                                                                                                                           | BI662291  |
| 1417657_s_at | 0.1190  | Zrf2          | zuotin related factor 2                                                                                                                         | BG067003  |
| 1418448_at   | 0.1190  | Rras          | Harvey rat sarcoma oncogene, subgroup R                                                                                                         | NM_009101 |
| 1419292_at   | 0.1190  | 9530081K03Rik | RIKEN cDNA 9530081K03 gene                                                                                                                      | NM_030127 |
| 1424002_at   | 0.1190  | Pdcl3         | phosducin-like 3                                                                                                                                | BC005601  |
| 1448830_at   | 0.1190  | Dusp1         | dual specificity phosphatase 1                                                                                                                  | NM_013642 |
| 1456109_a_at | 0.1190  | Mrps15        | mitochondrial ribosomal protein S15                                                                                                             | BB314055  |
| 1419529_at   | 0.1217  | Il23a         | interleukin 23, alpha subunit p19                                                                                                               | NM_031252 |
| 1416134_at   | 0.1259  | Aplp1         | amyloid beta (A4) precursor-like protein 1                                                                                                      | NM_007467 |
| 1420368_at   | 0.1328  | Denr          | Mus musculus ES cells cDNA, RIKEN full-length enriched library, clone:2410004J11 product:DENSITY-REGULATED PROTEIN (DRP), full insert sequence. | AK010394  |
| 1423610_at   | 0.1376  | Metap2        | Adult retina cDNA, RIKEN full-length enriched library, clone:A930035J23 product:unknown EST, full insert sequence                               | BG086961  |
| 1424871_s_at | 0.1376  | 1500031H01Rik | cDNA sequence BC013706                                                                                                                          | BC013706  |
| 1425248_a_at | 0.1376  | Tyro3         | TYRO3 protein tyrosine kinase 3                                                                                                                 | AB000828  |
| 1437354_at   | 0.1376  |               | 0 day neonate cerebellum cDNA, RIKEN full-length enriched library, clone:C230091D08 product:unclassifiable, full insert sequence                | AI154956  |
| 1449029_at   | 0.1376  | Mknk2         | MAP kinase-interacting serine/threonine kinase 2                                                                                                | NM_021462 |
| 1451959_a_at | 0.1376  | Vegfa         | vascular endothelial growth factor A                                                                                                            | U50279    |
| 1421260_a_at | 0.1381  | Srm           | spermidine synthase                                                                                                                             | NM_009272 |
| 1422967_a_at | 0.1390  | Tfrc          | transferrin receptor                                                                                                                            | BB810450  |
| 1437133_x_at | 0.1390  | Akr1b3        | 2 days pregnant adult female oviduct cDNA, RIKEN full-length enriched library, clone:E230024H01 product:unknown EST, full insert sequence       | AV127085  |
| 1430533_a_at | 0.1456  | Catnb         | catenin beta                                                                                                                                    | BI134907  |
| 1454686_at   | 0.1487  | 6430706D22Rik | RIKEN cDNA 6430706D22 gene                                                                                                                      | BM248225  |
| 1417394_at   | 0.1530  | Klf4          | Kruppel-like factor 4 (gut)                                                                                                                     | BG069413  |
| 1418300_a_at | 0.1530  | Mknk2         | MAP kinase-interacting serine/threonine kinase 2                                                                                                | NM_021462 |
| 1420842_at   | 0.1530  | Ptpnf         | protein tyrosine phosphatase, receptor type, F                                                                                                  | BF235516  |
| 1421519_a_at | 0.1530  | Zfp120        | zinc finger protein 120                                                                                                                         | NM_023266 |
| 1422532_at   | 0.1530  | Xpc           | xeroderma pigmentosum, complementation group C                                                                                                  | NM_009531 |
| 1424121_at   | 0.1530  | Commd1        | COMM domain containing 1                                                                                                                        | AB076722  |
| 1424766_at   | 0.1530  | BC004701      | cDNA sequence BC004701                                                                                                                          | BC004701  |
| 1425188_s_at | 0.1530  | Sel1h         | Sel1 (suppressor of lin-12) 1 homolog (C. elegans)                                                                                              | BC026816  |
| 1425231_a_at | 0.1530  | Zfp46         | zinc finger protein 46                                                                                                                          | BC006587  |
| 1426653_at   | 0.1530  | Mcm3          | minichromosome maintenance deficient 3 (S. cerevisiae)                                                                                          | BI658327  |
| 1426657_s_at | 0.1530  | Phgdh         | 3-phosphoglycerate dehydrogenase                                                                                                                | L21027    |
| 1427913_at   | 0.1530  | Rwdd1         | RWD domain containing 1                                                                                                                         | AK003262  |
| 1428076_s_at | 0.1530  | Ndufb4        | NADH dehydrogenase (ubiquinone) 1 beta subcomplex 4                                                                                             | BG968046  |
| 1428310_at   | 0.1530  | D3Wsu161e     | RIKEN cDNA C330027G06 gene                                                                                                                      | BF321707  |
| 1428340_s_at | 0.1530  | 1110012E06Rik | RIKEN cDNA 1110012E06 gene                                                                                                                      | BM944122  |
| 1433603_at   | 0.1530  | BC059730      | CDNA clone IMAGE:6772417, with apparent retained intron                                                                                         | C88200    |
| 1434120_a_at | 0.1530  | Metap2        | methionine aminopeptidase 2                                                                                                                     | AW742814  |
| 1435857_s_at | 0.1530  | Aplp1         | amyloid beta (A4) precursor-like protein 1                                                                                                      | AI848048  |
| 1437621_x_at | 0.1530  |               | AV216768 RIKEN full-length enriched, ES cells Mus musculus cDNA clone 2410167D16 3' similar to L21027 Mus musculus A10 mRNA, mRNA sequence.     | AV216768  |
| 1439415_x_at | 0.1530  | Rps21         | ribosomal protein S21                                                                                                                           | AV151252  |
| 1448319_at   | 0.1530  | Akr1b3        | aldo-keto reductase family 1, member B3 (aldose reductase)                                                                                      | NM_009658 |
| 1448320_at   | 0.1530  | Stim1         | stromal interaction molecule 1                                                                                                                  | NM_009287 |
| 1448439_at   | 0.1530  | D17Wsu104e    | interleukin 25                                                                                                                                  | NM_080837 |
| 1448440_x_at | 0.1530  | D17Wsu104e    | interleukin 25                                                                                                                                  | NM_080837 |

|              |        |               |                                                                                                                                                                     |           |
|--------------|--------|---------------|---------------------------------------------------------------------------------------------------------------------------------------------------------------------|-----------|
| 1451109_a_at | 0.1530 | Nedd4         | neural precursor cell expressed, developmentally down-regulated gene 4                                                                                              | BG073415  |
| 1452519_a_at | 0.1530 | Zfp36         | unnamed protein product; TIS11 (AA 1 - 183); Mouse TPA-induced TIS11 mRNA.                                                                                          | X14678    |
| 1455372_at   | 0.1530 | Cpeb3         | cytoplasmic polyadenylation element binding protein 3                                                                                                               | BB770826  |
| 1456244_x_at | 0.1530 | Txnl2         | thioredoxin-like 2                                                                                                                                                  | BB458835  |
| 1423948_at   | 0.1554 | Bag2          | Bcl2-associated athanogene 2                                                                                                                                        | BC016230  |
| 1428464_at   | 0.1554 | Ndufa3        | NADH dehydrogenase (ubiquinone) 1 alpha subcomplex, 3                                                                                                               | AV048277  |
| 1460711_at   | 0.1554 | 9930116P15Rik | ES cells cDNA, RIKEN full-length enriched library, clone:C330022M23 product:unclassifiable, full insert sequence                                                    | BG071611  |
| 1415761_at   | 0.1563 | Mrpl52        | mitochondrial ribosomal protein L52                                                                                                                                 | AV021593  |
| 1415950_a_at | 0.1563 | Pbp           | phosphatidylethanolamine binding protein                                                                                                                            | NM_018858 |
| 1415997_at   | 0.1563 | Txnip         | thioredoxin interacting protein                                                                                                                                     | AF173681  |
| 1416845_at   | 0.1563 | Hspa5bp1      | heat shock 70kDa protein 5 binding protein 1                                                                                                                        | NM_133804 |
| 1417155_at   | 0.1563 | Nmyc1         | neuroblastoma myc-related oncogene 1                                                                                                                                | BC005453  |
| 1417389_at   | 0.1563 | Gpc1          | glypican 1                                                                                                                                                          | NM_016696 |
| 1417773_at   | 0.1563 | Nans          | 602916387F1 NCI_CGAP_Lu29 Mus musculus cDNA clone IMAGE:5067068 5', mRNA sequence.                                                                                  | BI151886  |
| 1417774_at   | 0.1563 | Nans          | 602916387F1 NCI_CGAP_Lu29 Mus musculus cDNA clone IMAGE:5067068 5', mRNA sequence.                                                                                  | BI151886  |
| 1418888_a_at | 0.1563 | Sepr          | selenoprotein R                                                                                                                                                     | NM_013759 |
| 1419356_at   | 0.1563 | Klf7          | Kruppel-like factor 7 (ubiquitous)                                                                                                                                  | BB524597  |
| 1419550_a_at | 0.1563 | Stk39         | 6 days neonate head cDNA, RIKEN full-length enriched library, clone:5430411A13 product:serine/threonine kinase 39, STE20/SPS1 homolog (yeast), full insert sequence | BG919998  |
| 1419647_a_at | 0.1563 | Ier3          | immediate early response 3                                                                                                                                          | NM_133662 |
| 1420628_at   | 0.1563 | Pura          | purine rich element binding protein A                                                                                                                               | NM_008989 |
| 1420811_a_at | 0.1563 | Catnb         | catenin beta                                                                                                                                                        | NM_007614 |
| 1420878_a_at | 0.1563 | Ywhab         | tyrosine 3-monooxygenase/tryptophan 5-monooxygenase activation protein, beta polypeptide                                                                            | NM_018753 |
| 1422430_at   | 0.1563 | Fignl1        | fidgetin-like 1                                                                                                                                                     | NM_021891 |
| 1422527_at   | 0.1563 | H2-DMa        | histocompatibility 2, class II, locus DMA                                                                                                                           | NM_010386 |
| 1422718_at   | 0.1563 | Ap3s2         | adaptor-related protein complex 3, sigma 2 subunit                                                                                                                  | NM_009682 |
| 1423294_at   | 0.1563 | Mest          | Transcribed sequence with moderate similarity to protein sp:Q9UBF2 (H.sapiens) CPG2_HUMAN Coatomer gamma-2 subunit                                                  | AW555393  |
| 1423857_at   | 0.1563 | Mrpl30        | mitochondrial ribosomal protein L30                                                                                                                                 | BC004614  |
| 1423916_s_at | 0.1563 | Mlf2          | myeloid leukemia factor 2                                                                                                                                           | BC003975  |
| 1424285_s_at | 0.1563 | Arl6ip4       | ADP-ribosylation factor-like 6 interacting protein 4                                                                                                                | AB035383  |
| 1424391_at   | 0.1563 | Nrd1          | nardilysin, N-arginine dibasic convertase, NRD convertase 1                                                                                                         | BC026832  |
| 1424988_at   | 0.1563 | Mylip         | myosin regulatory light chain interacting protein                                                                                                                   | BC010206  |
| 1425196_a_at | 0.1563 | Hint2         | histidine triad nucleotide binding protein 2                                                                                                                        | AF356874  |
| 1426648_at   | 0.1563 | Mapkapk2      | MAP kinase-activated protein kinase 2                                                                                                                               | BG918951  |
| 1426895_at   | 0.1563 | Zfp191        | BB579760 RIKEN full-length enriched, 1 day pregnant adult female ovary Mus musculus cDNA clone 7230402O10 5', mRNA sequence.                                        | BB579760  |
| 1427490_at   | 0.1563 | Abcb7         | ATP-binding cassette, sub-family B (MDR/TAP), member 7                                                                                                              | U43892    |
| 1428075_at   | 0.1563 | Ndufb4        | NADH dehydrogenase (ubiquinone) 1 beta subcomplex 4                                                                                                                 | BG968046  |
| 1428286_at   | 0.1563 | 2900097C17Rik | 13 days embryo forelimb cDNA, RIKEN full-length enriched library, clone:5930433F13 product:unknown EST, full insert sequence                                        | AW545056  |
| 1428869_at   | 0.1563 | Nolc1         | nucleolar and coiled-body phosphoprotein 1                                                                                                                          | BM213850  |
| 1429144_at   | 0.1563 | 2310032D16Rik | RIKEN cDNA 2310032D16 gene                                                                                                                                          | AV291259  |
| 1429850_x_at | 0.1563 | 2010004B12Rik | RIKEN cDNA 2010004B12 gene                                                                                                                                          | AK008083  |
| 1448331_at   | 0.1563 | Ndufb7        | calmegin                                                                                                                                                            | NM_025843 |
| 1448346_at   | 0.1563 | Cfl1          | cofilin 1, non-muscle                                                                                                                                               | NM_007687 |
| 1448566_at   | 0.1563 | Slc40a1       | solute carrier family 40 (iron-regulated transporter), member 1                                                                                                     | AF226613  |
| 1448604_at   | 0.1563 | AA407809      | expressed sequence AA407809                                                                                                                                         | NM_030724 |
| 1448784_at   | 0.1563 | Taf10         | TAF10 RNA polymerase II, TATA box binding protein (TBP)-associated factor                                                                                           | NM_020024 |
| 1449080_at   | 0.1563 | Hdac2         | histone deacetylase 2                                                                                                                                               | NM_008229 |
| 1449294_at   | 0.1563 | Mrps15        | mitochondrial ribosomal protein S15                                                                                                                                 | NM_025544 |
| 1449324_at   | 0.1563 | Ero1l         | Transcribed sequences                                                                                                                                               | BM234652  |
| 1450008_a_at | 0.1563 | Catnb         | catenin beta                                                                                                                                                        | NM_007614 |

|              |        |               |                                                                                                                             |           |
|--------------|--------|---------------|-----------------------------------------------------------------------------------------------------------------------------|-----------|
| 1451425_a_at | 0.1563 | Mkrn1         | makorin, ring finger protein, 1                                                                                             | BC003329  |
| 1452357_at   | 0.1563 | Sept5         | septin 5                                                                                                                    | AF033350  |
| 1452646_at   | 0.1563 | 1110029F20Rik | RIKEN cDNA 1110029F20 gene                                                                                                  | AK003956  |
| 1454674_at   | 0.1563 | Fez1          | fasciculation and elongation protein zeta 1 (zygin I)                                                                       | AU067669  |
| 1454760_at   | 0.1563 | 2600017A12Rik | RIKEN cDNA 2600017A12 gene                                                                                                  | AW543705  |
| 1455288_at   | 0.1563 | 1110036O03Rik | RIKEN cDNA 1110036O03 gene                                                                                                  | BE951265  |
| 1456128_at   | 0.1563 | Atp5g2        | ATP synthase, H+ transporting, mitochondrial F0 complex, subunit c (subunit 9), isoform 2                                   | AW413339  |
| 1456471_x_at | 0.1563 | Phgdh         | Transcribed sequence with strong similarity to protein sp:Q61753 (M.musculus) SERA_MOUSE D-3-phosphoglycerate dehydrogenase | BB204486  |
| 1417357_at   | 0.1568 | Emd           | emerin                                                                                                                      | NM_007927 |
| 1437907_a_at | 0.1568 | Tbca          | tubulin cofactor a                                                                                                          | BB559082  |
| 1452315_at   | 0.1568 | Kif11         | kinesin family member 11                                                                                                    | BB827235  |
| 1415899_at   | 0.1571 | Junb          | Jun-B oncogene                                                                                                              | NM_008416 |
| 1424750_at   | 0.1571 | Zbtb1         | zinc finger and BTB domain containing 1                                                                                     | BC012239  |
| 1450878_at   | 0.1571 | Sri           | RIKEN cDNA 2210417O06 gene                                                                                                  | AK008404  |
| 1450981_at   | 0.1571 | Cnn2          | calponin 2                                                                                                                  | BI663014  |
| 1416250_at   | 0.1601 | Btg2          | B-cell translocation gene 2, anti-proliferative                                                                             | NM_007570 |
| 1416859_at   | 0.1601 | Fkbp3         | FK506 binding protein 3                                                                                                     | NM_013902 |
| 1424488_a_at | 0.1601 | 1110013G13Rik | RIKEN cDNA 1110013G13 gene                                                                                                  | BC011417  |
| 1428848_a_at | 0.1606 | Macf1         | microtubule-actin crosslinking factor 1                                                                                     | BM248206  |
| 1416584_at   | 0.1607 | Man2b2        | mannosidase 2, alpha B2                                                                                                     | NM_008550 |
| 1417792_at   | 0.1607 | Np220         | nuclear protein 220                                                                                                         | BM238431  |
| 1418248_at   | 0.1607 | Gla           | galactosidase, alpha                                                                                                        | NM_013463 |
| 1418545_at   | 0.1607 | Wasf1         | WASP family 1                                                                                                               | NM_031877 |
| 1420971_at   | 0.1607 | Ubr1          | ubiquitin protein ligase E3 component n-recognin 1                                                                          | BQ173927  |
| 1421152_a_at | 0.1607 | Gnao          | guanine nucleotide binding protein, alpha o                                                                                 | NM_010308 |
| 1421333_a_at | 0.1607 | Mynn          | myoneurin                                                                                                                   | AK019238  |
| 1421889_a_at | 0.1607 | Aplp2         | amyloid beta (A4) precursor-like protein 2                                                                                  | M97216    |
| 1421955_a_at | 0.1607 | Nedd4         | neural precursor cell expressed, developmentally down-regulated gene 4                                                      | NM_010890 |
| 1424269_a_at | 0.1607 | Myl6          | myosin light chain, alkali, nonmuscle                                                                                       | BC026760  |
| 1424515_at   | 0.1607 |               | BB440272 RIKEN full-length enriched, 9 days embryo Mus musculus cDNA clone D030020O16 3', mRNA sequence.                    | BB440272  |
| 1425194_a_at | 0.1607 | 6330577E15Rik | RIKEN cDNA 6330577E15 gene                                                                                                  | BC024403  |
| 1425206_a_at | 0.1607 | 0610009M14Rik | BB224620 RIKEN full-length enriched, adult male aorta and vein Mus musculus cDNA clone A530087G20 3', mRNA sequence.        | BB224620  |
| 1426297_at   | 0.1607 | Tcfe2a        | transcription factor E2a                                                                                                    | AF352579  |
| 1427294_a_at | 0.1607 | 1810073N04Rik | RIKEN cDNA 1810073N04 gene                                                                                                  | BB406585  |
| 1448050_s_at | 0.1607 | Map4k4        | mitogen-activated protein kinase kinase kinase kinase 4                                                                     | BF450398  |
| 1448498_at   | 0.1607 | Rps6ka4       | ribosomal protein S6 kinase, polypeptide 4                                                                                  | NM_019924 |
| 1448794_s_at | 0.1607 | Zrf2          | zuotin related factor 2                                                                                                     | BG067003  |
| 1416247_at   | 0.1617 | Dctn3         | dynactin 3                                                                                                                  | NM_016890 |
| 1416636_at   | 0.1617 | Rheb          | RAS-homolog enriched in brain                                                                                               | NM_053075 |
| 1417510_at   | 0.1617 | Vps4a         | vacuolar protein sorting 4a (yeast)                                                                                         | NM_126165 |
| 1418709_at   | 0.1617 | Cox7a1        | cytochrome c oxidase, subunit VIIa 1                                                                                        | AF037370  |
| 1426606_at   | 0.1617 | Crtac1        | cartilage acidic protein 1                                                                                                  | BB426194  |
| 1435041_at   | 0.1617 | Myl6          | myosin light chain, alkali, nonmuscle                                                                                       | BI108818  |
| 1415919_at   | 0.1632 | Npdc1         | neural proliferation, differentiation and control gene 1                                                                    | NM_008721 |
| 1416098_at   | 0.1632 | Syngn3        | synaptogyrin 3                                                                                                              | NM_011522 |
| 1416673_at   | 0.1632 | Bace2         | beta-site APP-cleaving enzyme 2                                                                                             | NM_019517 |
| 1416834_x_at | 0.1632 | Ndufb2        | NADH dehydrogenase (ubiquinone) 1 beta subcomplex, 2                                                                        | NM_026612 |
| 1417379_at   | 0.1632 | Iqgap1        | IQ motif containing GTPase activating protein 1                                                                             | NM_016721 |
| 1417380_at   | 0.1632 | Iqgap1        | IQ motif containing GTPase activating protein 1                                                                             | NM_016721 |
| 1417585_at   | 0.1632 | Nup210        | nucleoporin 210                                                                                                             | NM_018815 |
| 1417959_at   | 0.1632 | Pdlim7        | PDZ and LIM domain 7                                                                                                        | NM_026131 |
| 1418577_at   | 0.1632 | Trim8         | tripartite motif protein 8                                                                                                  | BG063064  |
| 1418974_at   | 0.1632 | Blzf1         | basic leucine zipper nuclear factor 1                                                                                       | AK006544  |
| 1419351_a_at | 0.1632 | 0610007P06Rik | RIKEN cDNA 0610007P06 gene                                                                                                  | BC003916  |

|              |        |               |                                                                                                                                                                                                   |           |
|--------------|--------|---------------|---------------------------------------------------------------------------------------------------------------------------------------------------------------------------------------------------|-----------|
| 1420922_at   | 0.1632 | Usp9x         | Similar to ubiquitin specific protease 9, X-linked isoform 2; Drosophila fat facets related, X-linked; ubiquitin specific protease 9, X chromosome (fat facets-like Drosophila) (LOC240170), mRNA | AW107303  |
| 1421395_at   | 0.1632 | Zik1          | zinc finger protein interacting with K protein 1                                                                                                                                                  | NM_009577 |
| 1422520_at   | 0.1632 | Nef3          | neurofilament 3, medium                                                                                                                                                                           | NM_008691 |
| 1422614_s_at | 0.1632 | Bloc1s1       | GCN5 general control of amino acid synthesis-like 1 (yeast)                                                                                                                                       | NM_015740 |
| 1422720_at   | 0.1632 | Isl1          | UI-M-DJ2-bwa-g-01-0-UI.s1 NIH_BMAP_DJ2 Mus musculus cDNA clone UI-M-DJ2-bwa-g-01-0-UI 3', mRNA sequence.                                                                                          | BQ176915  |
| 1423086_at   | 0.1632 | Npc1          | RIKEN cDNA 2400010D15 gene                                                                                                                                                                        | BB769209  |
| 1423804_a_at | 0.1632 | Idi1          | isopentenyl-diphosphate delta isomerase                                                                                                                                                           | BC004801  |
| 1423919_at   | 0.1632 | BC023882      | cDNA sequence BC023882                                                                                                                                                                            | BC027393  |
| 1424396_a_at | 0.1632 | Asrgl1        | asparaginase like 1                                                                                                                                                                               | AU040643  |
| 1424640_at   | 0.1632 | 1110033P22Rik | RIKEN cDNA 1110033P22 gene                                                                                                                                                                        | BC018479  |
| 1424684_at   | 0.1632 | Rab5c         | RAB5C, member RAS oncogene family                                                                                                                                                                 | BC023027  |
| 1424773_at   | 0.1632 | 1110012M11Rik | RIKEN cDNA 1110012M11 gene                                                                                                                                                                        | BC020119  |
| 1428494_a_at | 0.1632 | Polr2i        | polymerase (RNA) II (DNA directed) polypeptide I                                                                                                                                                  | BB284638  |
| 1430692_a_at | 0.1632 | Sel1h         | Sel1 (suppressor of lin-12) 1 homolog (C. elegans)                                                                                                                                                | AK005023  |
| 1433451_at   | 0.1632 | Cdk5r         | cyclin-dependent kinase 5, regulatory subunit (p35)                                                                                                                                               | BB177836  |
| 1433549_x_at | 0.1632 | Rps21         | ribosomal protein S21                                                                                                                                                                             | AV123618  |
| 1433721_x_at | 0.1632 | Rps21         | ribosomal protein S21                                                                                                                                                                             | AV123577  |
| 1433946_at   | 0.1632 | Zik1          | zinc finger protein interacting with K protein 1                                                                                                                                                  | BE824681  |
| 1434396_a_at | 0.1632 | Myl6          | myosin light chain, alkali, nonmuscle                                                                                                                                                             | AU017189  |
| 1434442_at   | 0.1632 | D5Ert593e     | DNA segment, Chr 5, ERATO Doi 593, expressed                                                                                                                                                      | BB667844  |
| 1435067_at   | 0.1632 | B230208H17Rik | RIKEN cDNA B230208H17 gene                                                                                                                                                                        | BG075288  |
| 1435652_a_at | 0.1632 | Gnai2         | uz40a02.x1 NCI_CGAP_Mam5 Mus musculus cDNA clone IMAGE:3671498 3', mRNA sequence.                                                                                                                 | BF228116  |
| 1435690_at   | 0.1632 | 9030624J02Rik | RIKEN cDNA 9030624J02 gene                                                                                                                                                                        | BB476775  |
| 1436859_at   | 0.1632 | 2700007P21Rik | RIKEN cDNA 2700007P21 gene                                                                                                                                                                        | AV342631  |
| 1438264_a_at | 0.1632 | Tpp2          | tripeptidyl peptidase II                                                                                                                                                                          | AW536258  |
| 1448086_at   | 0.1632 | D1Ert164e     | Transcribed sequences                                                                                                                                                                             | BG079429  |
| 1448592_at   | 0.1632 | Crtap         | cartilage associated protein                                                                                                                                                                      | NM_019922 |
| 1449011_at   | 0.1632 | Slc12a7       | solute carrier family 12, member 7                                                                                                                                                                | BB732135  |
| 1449108_at   | 0.1632 | Fdx1          | ferredoxin 1                                                                                                                                                                                      | D43690    |
| 1449138_at   | 0.1632 | Sf3b1         | splicing factor 3b, subunit 1                                                                                                                                                                     | BE951504  |
| 1450700_at   | 0.1632 | Cdc42ep3      | CDC42 effector protein (Rho GTPase binding) 3                                                                                                                                                     | BB012489  |
| 1452002_at   | 0.1632 | BC024969      | cDNA sequence BC024969                                                                                                                                                                            | BC024969  |
| 1452099_at   | 0.1632 | AA408296      | expressed sequence AA408296                                                                                                                                                                       | BG070043  |
| 1456615_a_at | 0.1632 | Falz          | vx16a10.r1 Soares_thymus_2NbMT Mus musculus cDNA clone IMAGE:1264602 5', mRNA sequence.                                                                                                           | AA867746  |
| 1456745_x_at | 0.1632 | Sdbcag84      | serologically defined breast cancer antigen 84                                                                                                                                                    | BB253632  |
| 1418942_at   | 0.1634 | Ccdc2         | coiled-coil domain containing 2                                                                                                                                                                   | NM_026319 |
| 1424172_at   | 0.1634 | Hagh          | hydroxyacyl glutathione hydrolase                                                                                                                                                                 | BC004749  |
| 1451432_x_at | 0.1634 | 2010004B12Rik | RIKEN cDNA 2010004B12 gene                                                                                                                                                                        | BC022729  |
| 1421698_a_at | 0.1640 | Col19a1       | procollagen, type XIX, alpha 1                                                                                                                                                                    | NM_007733 |
| 1448427_at   | 0.1640 | Ndufa6        | NADH dehydrogenase (ubiquinone) 1 alpha subcomplex, 6 (B14)                                                                                                                                       | NM_025987 |
| 1415811_at   | 0.1650 | Uhrf1         | ubiquitin-like, containing PHD and RING finger domains, 1                                                                                                                                         | BB702754  |
| 1416057_at   | 0.1650 | Np15          | nuclear protein 15.6                                                                                                                                                                              | BC027265  |
| 1416062_at   | 0.1650 | Tbc1d15       | TBC1 domain family, member 15                                                                                                                                                                     | BF577643  |
| 1416129_at   | 0.1650 | 1300002F13Rik | RIKEN cDNA 1300002F13 gene                                                                                                                                                                        | NM_133753 |
| 1416495_s_at | 0.1650 | Ndufs5        | NADH dehydrogenase (ubiquinone) Fe-S protein 5                                                                                                                                                    | NM_134104 |
| 1416528_at   | 0.1650 | Sh3bgrl3      | SH3 domain binding glutamic acid-rich protein-like 3                                                                                                                                              | NM_080559 |
| 1416782_s_at | 0.1650 | DXImx39e      | DNA segment, Chr X, Immunex 39, expressed                                                                                                                                                         | NM_138602 |
| 1417594_at   | 0.1650 | Gkap42        | cGMP-dependent protein kinase anchoring protein                                                                                                                                                   | NM_019832 |
| 1418443_at   | 0.1650 | Xpo1          | exportin 1, CRM1 homolog (yeast)                                                                                                                                                                  | BC025628  |
| 1419803_s_at | 0.1650 | 2700094L05Rik | RIKEN cDNA 2700094L05 gene                                                                                                                                                                        | C76605    |
| 1421266_s_at | 0.1650 | Nfkbib        | nuclear factor of kappa light chain gene enhancer in B-cells inhibitor, beta                                                                                                                      | NM_010908 |

|              |        |               |                                                                                                                                                                                                                                                                                                                                                                                                  |           |
|--------------|--------|---------------|--------------------------------------------------------------------------------------------------------------------------------------------------------------------------------------------------------------------------------------------------------------------------------------------------------------------------------------------------------------------------------------------------|-----------|
| 1421881_a_at | 0.1650 | Elavl2        | ELAV (embryonic lethal, abnormal vision, Drosophila)-like 2 (Hu antigen B)                                                                                                                                                                                                                                                                                                                       | BB105998  |
| 1421903_at   | 0.1650 | 2810405O22Rik | RIKEN cDNA 2810405O22 gene                                                                                                                                                                                                                                                                                                                                                                       | AK005112  |
| 1422597_at   | 0.1650 | Mmp15         | matrix metalloproteinase 15                                                                                                                                                                                                                                                                                                                                                                      | NM_008609 |
| 1422683_at   | 0.1650 | Irak1bp1      | interleukin-1 receptor-associated kinase 1 binding protein 1                                                                                                                                                                                                                                                                                                                                     | NM_022986 |
| 1422966_a_at | 0.1650 | Tfrc          | transferrin receptor                                                                                                                                                                                                                                                                                                                                                                             | BB810450  |
| 1424738_at   | 0.1650 | 4932432K03Rik | RIKEN cDNA 4932432K03 gene                                                                                                                                                                                                                                                                                                                                                                       | BE288551  |
| 1425721_at   | 0.1650 | Phip          | pleckstrin homology domain interacting protein                                                                                                                                                                                                                                                                                                                                                   | BI737352  |
| 1425940_a_at | 0.1650 | Ssbp3         | single-stranded DNA binding protein 3                                                                                                                                                                                                                                                                                                                                                            | AF170906  |
| 1427309_at   | 0.1650 | BC027073      | cDNA sequence BC027073                                                                                                                                                                                                                                                                                                                                                                           | BF583012  |
| 1428842_a_at | 0.1650 | Ngfrap1       | nerve growth factor receptor (TNFRSF16) associated protein 1                                                                                                                                                                                                                                                                                                                                     | BI407690  |
| 1428954_at   | 0.1650 | Slc9a3r2      | solute carrier family 9 (sodium/hydrogen exchanger), isoform 3 regulator 2                                                                                                                                                                                                                                                                                                                       | AK004710  |
| 1430571_s_at | 0.1650 | 2410153K17Rik | unnamed protein product; hypothetical Armadillo repeat/Armadillo/plakoglobin ARM repeat profile containing protein (InterPro IPR000225, PROSITE PS50176, evidence: InterPro) putative; Mus musculus ES cells cDNA, RIKEN full-length enriched library, clone:2410153K17 product:hypothetical Armadillo repeat/Armadillo/plakoglobin ARM repeat profile containing protein, full insert sequence. | AK010815  |
| 1433554_at   | 0.1650 | AU022870      | hypothetical protein MGC56855                                                                                                                                                                                                                                                                                                                                                                    | BM246500  |
| 1434392_at   | 0.1650 | Usp34         | U2af1-rs1 region 2                                                                                                                                                                                                                                                                                                                                                                               | BM235696  |
| 1434872_x_at | 0.1650 | Rpl37         | AV170241 Mus musculus head C57BL/6J 13-day embryo Mus musculus cDNA clone 3110094P05, mRNA sequence.                                                                                                                                                                                                                                                                                             | AV170241  |
| 1448876_at   | 0.1650 | Evc           | Ellis van Creveld gene homolog (human)                                                                                                                                                                                                                                                                                                                                                           | NM_021292 |
| 1448917_at   | 0.1650 | Thrap6        | thyroid hormone receptor associated protein 6                                                                                                                                                                                                                                                                                                                                                    | NM_027212 |
| 1448952_at   | 0.1650 | A030009H04Rik | RIKEN cDNA A030009H04 gene                                                                                                                                                                                                                                                                                                                                                                       | AK002962  |
| 1450466_at   | 0.1650 |               | Adult male corpora quadrigemina cDNA, RIKEN full-length enriched library, clone:B230310J22 product:unclassifiable, full insert sequence                                                                                                                                                                                                                                                          | BI739719  |
| 1450925_a_at | 0.1650 | Rps27l        | ribosomal protein S27-like                                                                                                                                                                                                                                                                                                                                                                       | BB836796  |
| 1452790_x_at | 0.1650 | Ndufa3        | NADH dehydrogenase (ubiquinone) 1 alpha subcomplex, 3                                                                                                                                                                                                                                                                                                                                            | AV048277  |
| 1453550_a_at | 0.1650 | 3732409C05Rik | RIKEN cDNA 3732409C05 gene                                                                                                                                                                                                                                                                                                                                                                       | AK011187  |
| 1455039_a_at | 0.1650 | Sin3b         | transcriptional regulator, SIN3B (yeast)                                                                                                                                                                                                                                                                                                                                                         | BF017589  |
| 1433991_x_at | 0.1660 | Dbi           | diazepam binding inhibitor                                                                                                                                                                                                                                                                                                                                                                       | AV007315  |
| 1451291_at   | 0.1660 | 2610036N15Rik | RIKEN cDNA 2610036N15 gene                                                                                                                                                                                                                                                                                                                                                                       | BC026942  |
| 1460675_at   | 0.1660 | Igsf8         | immunoglobulin superfamily, member 8                                                                                                                                                                                                                                                                                                                                                             | AF411055  |
| 1460718_s_at | 0.1660 | Mtch1         | mitochondrial carrier homolog 1 (C. elegans)                                                                                                                                                                                                                                                                                                                                                     | AF192558  |
| 1416245_at   | 0.1678 | O610033H09Rik | RIKEN cDNA O610033H09 gene                                                                                                                                                                                                                                                                                                                                                                       | NM_025338 |
| 1416910_at   | 0.1692 | Dnajd1        | DnaJ (Hsp40) homolog, subfamily D, member 1                                                                                                                                                                                                                                                                                                                                                      | NM_025384 |
| 1417652_a_at | 0.1692 | Tbca          | tubulin cofactor a                                                                                                                                                                                                                                                                                                                                                                               | NM_009321 |
| 1418123_at   | 0.1692 | Unc119        | unc-119 homolog (C. elegans)                                                                                                                                                                                                                                                                                                                                                                     | BC001990  |
| 1418273_a_at | 0.1692 | Rpl30         | ribosomal protein L30                                                                                                                                                                                                                                                                                                                                                                            | NM_009083 |
| 1418714_at   | 0.1692 | Dusp8         | dual specificity phosphatase 8                                                                                                                                                                                                                                                                                                                                                                   | NM_008748 |
| 1418918_at   | 0.1692 | Igfbp1        | insulin-like growth factor binding protein 1                                                                                                                                                                                                                                                                                                                                                     | NM_008341 |
| 1420402_at   | 0.1692 | Atp2b2        | ATPase, Ca++ transporting, plasma membrane 2                                                                                                                                                                                                                                                                                                                                                     | NM_009723 |
| 1420617_at   | 0.1692 | Cpeb4         | cytoplasmic polyadenylation element binding protein 4                                                                                                                                                                                                                                                                                                                                            | NM_026252 |
| 1422134_at   | 0.1692 | Fosb          | FBJ osteosarcoma oncogene B                                                                                                                                                                                                                                                                                                                                                                      | NM_008036 |
| 1422507_at   | 0.1692 | Cstb          | cystatin B                                                                                                                                                                                                                                                                                                                                                                                       | NM_007793 |
| 1425384_a_at | 0.1692 | Ube4a         | ubiquitination factor E4A, UFD2 homolog (S. cerevisiae)                                                                                                                                                                                                                                                                                                                                          | BC006649  |
| 1426659_a_at | 0.1692 | BC029892      | Similar to 60S ribosomal protein L23a (LOC268449), mRNA                                                                                                                                                                                                                                                                                                                                          | BF178310  |
| 1427173_a_at | 0.1692 | Mrps33        | mitochondrial ribosomal protein S33                                                                                                                                                                                                                                                                                                                                                              | Y17852    |
| 1434053_x_at | 0.1692 | Atp5k         | ATP synthase, H+ transporting, mitochondrial F1F0 complex, subunit leucine rich repeat (in FLII) interacting protein 2                                                                                                                                                                                                                                                                           | AV216686  |
| 1436510_a_at | 0.1692 | Lrrfip2       |                                                                                                                                                                                                                                                                                                                                                                                                  | BE456782  |
| 1448685_at   | 0.1692 | 2900010M23Rik | RIKEN cDNA 2900010M23 gene                                                                                                                                                                                                                                                                                                                                                                       | NM_026063 |
| 1451012_a_at | 0.1692 | Csda          | AV216648 RIKEN full-length enriched, ES cells Mus musculus cDNA clone 2410165I03 3' similar to D14485 Mouse mRNA for dbpA murine homologue, mRNA sequence.                                                                                                                                                                                                                                       | AV216648  |
| 1451211_a_at | 0.1692 | Lgtn          | ligatin                                                                                                                                                                                                                                                                                                                                                                                          | BC025036  |
| 1451255_at   | 0.1692 | Lisch7        | liver-specific bHLH-Zip transcription factor                                                                                                                                                                                                                                                                                                                                                     | BC004672  |
| 1451602_at   | 0.1692 | Snx6          | sorting nexin 6                                                                                                                                                                                                                                                                                                                                                                                  | BC025911  |

|              |        |               |                                                                                                                                                                                                      |           |
|--------------|--------|---------------|------------------------------------------------------------------------------------------------------------------------------------------------------------------------------------------------------|-----------|
| 1453362_x_at | 0.1692 | Rps24         | ribosomal protein S24                                                                                                                                                                                | AK008386  |
| 1415971_at   | 0.1702 | Marcks        | myristoylated alanine rich protein kinase C substrate                                                                                                                                                | AW546141  |
| 1417131_at   | 0.1702 | Cdc25a        | C76119 Mouse 3.5-dpc blastocyst cDNA Mus musculus cDNA clone J0003H02 3' similar to Rat mRNA for cdc25A, mRNA sequence.                                                                              | C76119    |
| 1421131_a_at | 0.1702 | Zfp111        | zinc finger protein 111                                                                                                                                                                              | AV174549  |
| 1424110_a_at | 0.1702 | Nme1          | expressed in non-metastatic cells 1, protein                                                                                                                                                         | BC005629  |
| 1425702_a_at | 0.1702 | Enpp5         | ectonucleotide pyrophosphatase/phosphodiesterase 5                                                                                                                                                   | BC011294  |
| 1426244_at   | 0.1702 | Mapre2        | microtubule-associated protein, RP/EB family, member 2                                                                                                                                               | BC027056  |
| 1426641_at   | 0.1702 | Trib2         | expressed sequence AW319517                                                                                                                                                                          | BB354684  |
| 1426660_x_at | 0.1702 | BC029892      | Similar to 60S ribosomal protein L23a (LOC268449), mRNA                                                                                                                                              | BF178310  |
| 1427335_at   | 0.1702 | 6720456H20Rik | BB238358 RIKEN full-length enriched, 3 days neonate thymus Mus musculus cDNA clone A630071E21 3', mRNA sequence.                                                                                     | BB238358  |
| 1428453_at   | 0.1702 | 4930487N19Rik | RIKEN cDNA 4930487N19 gene                                                                                                                                                                           | AK017805  |
| 1439389_s_at | 0.1702 | Myadm         | BB500055 RIKEN full-length enriched, 0 day neonate kidney Mus musculus cDNA clone D630024J02 3' similar to AJ001616 Mus musculus mRNA for myeloid associated differentiation protein, mRNA sequence. | BB500055  |
| 1450162_at   | 0.1702 | Dpf3          | D4, zinc and double PHD fingers, family 3                                                                                                                                                            | NM_058212 |
| 1417886_at   | 0.1707 | 1810009A15Rik | RIKEN cDNA 1110055N21 gene                                                                                                                                                                           | BE307471  |
| 1434561_at   | 0.1709 | Asxl1         | additional sex combs like 1 (Drosophila)                                                                                                                                                             | BI648411  |
| 1448127_at   | 0.1709 | Rrm1          | ribonucleotide reductase M1                                                                                                                                                                          | BB758819  |
| 1450350_a_at | 0.1709 | Jundm2        | Jun dimerization protein 2                                                                                                                                                                           | NM_030887 |
| 1452143_at   | 0.1709 | Spnb2         | spectrin beta 2                                                                                                                                                                                      | BQ174069  |
| 1439368_a_at | 0.1719 | Slc9a3r2      | AV002797 Mus musculus C57BL/6J kidney Mus musculus cDNA clone 0610020H24, mRNA sequence.                                                                                                             | AV002797  |
| 1449633_s_at | 0.1721 | C330027I04Rik | RIKEN cDNA C330027I04 gene                                                                                                                                                                           | AI841843  |
| 1418019_at   | 0.1734 | Cpd           | carboxypeptidase D                                                                                                                                                                                   | NM_007754 |
| 1420909_at   | 0.1734 | Vegfa         | vascular endothelial growth factor A                                                                                                                                                                 | NM_009505 |
| 1421255_a_at | 0.1734 | Cabp1         | calcium binding protein 1                                                                                                                                                                            | NM_013879 |
| 1422489_at   | 0.1734 | Gcs1          | glucosidase 1                                                                                                                                                                                        | NM_020619 |
| 1422807_at   | 0.1734 | Arf5          | ADP-ribosylation factor 5                                                                                                                                                                            | NM_007480 |
| 1422882_at   | 0.1734 | Sypl          | synaptophysin-like protein                                                                                                                                                                           | BE333485  |
| 1427876_at   | 0.1734 | 2610312B22Rik | RIKEN cDNA 2610312B22 gene                                                                                                                                                                           | BB703070  |
| 1448483_a_at | 0.1734 | Ndufb2        | NADH dehydrogenase (ubiquinone) 1 beta subcomplex, 2                                                                                                                                                 | NM_026612 |
| 1452184_at   | 0.1734 | Ndufb9        | NADH dehydrogenase (ubiquinone) 1 beta subcomplex, 9                                                                                                                                                 | W29413    |
| 1416367_at   | 0.1743 | 1110001J03Rik | RIKEN cDNA 1110001J03 gene                                                                                                                                                                           | NM_025363 |
| 1416519_at   | 0.1743 | Rpl36         | ribosomal protein L36                                                                                                                                                                                | NM_018730 |
| 1417348_at   | 0.1743 | 2310039H08Rik | male enhanced antigen 1                                                                                                                                                                              | NM_025966 |
| 1418022_at   | 0.1743 | Narg1         | NMDA receptor-regulated gene 1                                                                                                                                                                       | BG067031  |
| 1421052_a_at | 0.1743 | Sms           | spermine synthase                                                                                                                                                                                    | NM_009214 |
| 1424315_at   | 0.1743 | 1110004E09Rik | RIKEN cDNA 1110004E09 gene                                                                                                                                                                           | BC019533  |
| 1424456_at   | 0.1743 | Pvrl2         | poliovirus receptor-related 2                                                                                                                                                                        | BC009088  |
| 1424894_at   | 0.1743 | Rab13         | RAB13, member RAS oncogene family                                                                                                                                                                    | BC027214  |
| 1425617_at   | 0.1743 | Dhx9          | DEAH (Asp-Glu-Ala-His) box polypeptide 9                                                                                                                                                             | U91922    |
| 1427143_at   | 0.1743 | Jarid1b       | jumonji, AT rich interactive domain 1B (Rbp2 like)                                                                                                                                                   | BC019446  |
| 1427943_at   | 0.1743 | Acyp2         | acylphosphatase 2, muscle type                                                                                                                                                                       | BI730288  |
| 1428164_at   | 0.1743 | Nudt9         | nudix (nucleoside diphosphate linked moiety X)-type motif 9                                                                                                                                          | AK004444  |
| 1428214_at   | 0.1743 | Tomm7         | translocase of outer mitochondrial membrane 7 homolog (yeast)                                                                                                                                        | BB609428  |
| 1428679_s_at | 0.1743 | 0610010K14Rik | RIKEN cDNA 0610010K14 gene                                                                                                                                                                           | AK003842  |
| 1429473_at   | 0.1743 | 1200003I07Rik | RIKEN cDNA 1200003I07 gene                                                                                                                                                                           | AV292561  |
| 1430295_at   | 0.1743 | Gna13         | guanine nucleotide binding protein, alpha 13                                                                                                                                                         | BG094302  |
| 1433616_a_at | 0.1743 | 2310028O11Rik | Adult male xiphoid cartilage cDNA, RIKEN full-length enriched library, clone:5230400C04 product:unknown EST, full insert sequence                                                                    | BG793007  |
| 1435517_x_at | 0.1743 | Ralb          | BB465250 RIKEN full-length enriched, 12 days embryo spinal ganglion Mus musculus cDNA clone D130097N13 3' similar to L19699 Rat GTP-binding protein (ral B) mRNA, mRNA sequence.                     | BB465250  |
| 1436121_a_at | 0.1743 | 2510027N19Rik | RIKEN cDNA 2510027N19 gene                                                                                                                                                                           | BI903760  |
| 1437013_x_at | 0.1743 | Atp6v0b       | AV339131 RIKEN full-length enriched, adult male olfactory bulb Mus musculus cDNA clone 6430502C13 3', mRNA sequence.                                                                                 | AV339131  |
| 1437450_x_at | 0.1743 | 2700060E02Rik | RIKEN cDNA 2700060E02 gene                                                                                                                                                                           | AV167877  |



|              |        |               |                                                                                                                                                                                                                    |           |
|--------------|--------|---------------|--------------------------------------------------------------------------------------------------------------------------------------------------------------------------------------------------------------------|-----------|
| 1438986_x_at | 0.1743 | Rps17         | ribosomal protein S17                                                                                                                                                                                              | AV064451  |
| 1450638_at   | 0.1743 | Pdcd5         | programmed cell death 5                                                                                                                                                                                            | AF161074  |
| 1451017_at   | 0.1743 | Sdbcag84      | BB556862 RIKEN full-length enriched, 2 days pregnant adult female ovary Mus musculus cDNA clone E330025K14 3' similar to AL161963 Homo sapiens mRNA; cDNA DKFZp547A2190 (from clone DKFZp547A2190), mRNA sequence. | BB556862  |
| 1452164_at   | 0.1743 | BC038286      | cDNA sequence BC038286                                                                                                                                                                                             | BI647183  |
| 1452679_at   | 0.1743 | 2410129E14Rik | Transcribed sequence with strong similarity to protein ref:NP_001060.1 (H.sapiens) tubulin, beta polypeptide [Homo sapiens]                                                                                        | AA986082  |
| 1456590_x_at | 0.1743 | Akr1b3        | BB469763 RIKEN full-length enriched, 12 days embryo eyeball Mus musculus cDNA clone D230028K07 3' similar to L39795 Mus musculus (clone MAR1) aldose reductase mRNA, mRNA sequence.                                | BB469763  |
| 1460697_s_at | 0.1743 | 2610209M04Rik | RIKEN cDNA 2610209M04 gene                                                                                                                                                                                         | BC027564  |
| 1460739_at   | 0.1743 | D11Bwg0280e   | DNA segment, Chr 11, Brigham & Women's Genetics 0280e expressed                                                                                                                                                    | BQ174371  |
| 1416922_a_at | 0.1751 | Bnip3l        | BCL2/adenovirus E1B 19kDa-interacting protein 3-like                                                                                                                                                               | AK018668  |
| 1422432_at   | 0.1751 | Dbi           | diazepam binding inhibitor                                                                                                                                                                                         | NM_007830 |
| 1423321_at   | 0.1751 | Myadm         | myeloid-associated differentiation marker                                                                                                                                                                          | BI078799  |
| 1423087_a_at | 0.1757 | 1110002E23Rik | RIKEN cDNA 1110002E23 gene                                                                                                                                                                                         | BB453951  |
| 1418910_at   | 0.1758 | Bmp7          | bone morphogenetic protein 7                                                                                                                                                                                       | NM_007557 |
| 1427938_at   | 0.1764 | Mycbp         | c-myc binding protein                                                                                                                                                                                              | BB046347  |
| 1427903_at   | 0.1765 | Phpt1         | RIKEN cDNA 1700008C22 gene                                                                                                                                                                                         | BB650419  |
| 1422524_at   | 0.1767 | Abcb6         | ATP-binding cassette, sub-family B (MDR/TAP), member 6                                                                                                                                                             | NM_023732 |
| 1418439_at   | 0.1774 | 2900055D03Rik | RIKEN cDNA 2900055D03 gene                                                                                                                                                                                         | NM_026065 |
| 1422608_at   | 0.1774 | Arpp19        | cAMP-regulated phosphoprotein 19                                                                                                                                                                                   | BE648432  |
| 1423507_a_at | 0.1774 | Sirt2         | Transcribed sequence with moderate similarity to protein ref:NP_036369.2 (H.sapiens) sirtuin 2, isoform 1; SIR2                                                                                                    | BB807595  |
| 1424753_at   | 0.1774 | Nudt14        | nudix (nucleoside diphosphate linked moiety X)-type motif 14                                                                                                                                                       | BC025444  |
| 1424771_at   | 0.1774 | E130307C13    | hypothetical protein E130307C13                                                                                                                                                                                    | BF661121  |
| 1431771_a_at | 0.1774 | Irak1bp1      | interleukin-1 receptor-associated kinase 1 binding protein 1                                                                                                                                                       | AK014712  |
| 1436803_a_at | 0.1774 | Ndufb9        | NADH dehydrogenase (ubiquinone) 1 beta subcomplex, 9                                                                                                                                                               | AV161987  |
| 1449040_a_at | 0.1774 | Sephs2        | selenophosphate synthetase 2                                                                                                                                                                                       | NM_009266 |
| 1455950_x_at | 0.1774 | Rpl35         | RIKEN cDNA 1700123D08 gene                                                                                                                                                                                         | AV172221  |
| 1456381_x_at | 0.1774 | Mcl1          | myeloid cell leukemia sequence 1                                                                                                                                                                                   | AV274748  |
| 1418327_at   | 0.1775 | 1110058L19Rik | RIKEN cDNA 1110058L19 gene                                                                                                                                                                                         | NM_026503 |
| 1415879_a_at | 0.1804 | Rplp2         | ribosomal protein, large P2                                                                                                                                                                                        | BC012413  |
| 1423653_at   | 0.1804 | Atp1a1        | ATPase, Na <sup>+</sup> /K <sup>+</sup> transporting, alpha 1 polypeptide                                                                                                                                          | BC025618  |
| 1426940_at   | 0.1804 | BC023957      | cDNA sequence BC023957                                                                                                                                                                                             | BI412808  |
| 1434325_x_at | 0.1804 | Prkar1b       | BB274009 RIKEN full-length enriched, 10 days neonate cortex Mus musculus cDNA clone A830086C24 3', mRNA sequence.                                                                                                  | BB274009  |
| 1451259_at   | 0.1804 | Smfn          | small fragment nuclease                                                                                                                                                                                            | BC003445  |
| 1452726_a_at | 0.1804 | 1110061L23Rik | RIKEN cDNA 1110061L23 gene                                                                                                                                                                                         | AK016797  |
| 1456691_s_at | 0.1804 | Srd5a2l       | BB825787 RIKEN full-length enriched, mammary gland RCB-0526 Jyg-MC(A) cDNA Mus musculus cDNA clone G830039K08 3', mRNA sequence.                                                                                   | BB825787  |
| 1422480_at   | 0.1805 | Snx3          | sorting nexin 3                                                                                                                                                                                                    | NM_017472 |
| 1426744_at   | 0.1805 | Srebf2        | sterol regulatory element binding factor 2                                                                                                                                                                         | BM123132  |
| 1448540_a_at | 0.1805 | 0610012G03Rik | RIKEN cDNA 0610012G03 gene                                                                                                                                                                                         | BC021536  |
| 1451385_at   | 0.1805 | 2310056P07Rik | RIKEN cDNA 2310056P07 gene                                                                                                                                                                                         | BC010826  |
| 1423210_a_at | 0.1808 | Nola3         | nucleolar protein family A, member 3                                                                                                                                                                               | AK004120  |
| 1449267_at   | 0.1808 | 3110023E09Rik | RIKEN cDNA 3110023E09 gene                                                                                                                                                                                         | BC006876  |
| 1452246_at   | 0.1808 | Ostf1         | osteoclast stimulating factor 1                                                                                                                                                                                    | U58888    |
| 1454870_x_at | 0.1808 | D15Ertd747e   | DNA segment, Chr 15, ERATO Doi 747, expressed                                                                                                                                                                      | BB251205  |
| 1416480_a_at | 0.1810 | Hig1          | hypoxia induced gene 1                                                                                                                                                                                             | NM_019814 |
| 1417320_at   | 0.1810 | Grpel1        | GrpE-like 1, mitochondrial                                                                                                                                                                                         | NM_024478 |
| 1417399_at   | 0.1810 | Gas6          | growth arrest specific 6                                                                                                                                                                                           | NM_019521 |
| 1418244_at   | 0.1810 | Nat5          | N-acetyltransferase 5 (ARD1 homolog, S. cerevisiae)                                                                                                                                                                | NM_026425 |
| 1422011_s_at | 0.1810 | Xlr           | X-linked lymphocyte-regulated complex                                                                                                                                                                              | BC005560  |
| 1422716_a_at | 0.1810 | Acp1          | acid phosphatase 1, soluble                                                                                                                                                                                        | AW554436  |

|              |        |               |                                                                                                                                                                                                                                                                                                                                      |           |
|--------------|--------|---------------|--------------------------------------------------------------------------------------------------------------------------------------------------------------------------------------------------------------------------------------------------------------------------------------------------------------------------------------|-----------|
| 1426510_at   | 0.1810 | C330023F11Rik | RIKEN cDNA C330023F11 gene                                                                                                                                                                                                                                                                                                           | AW537824  |
| 1438659_x_at | 0.1810 | 0710001P09Rik | BB458460 RIKEN full-length enriched, 12 days embryo spinal ganglion <i>Mus musculus</i> cDNA clone D130057E08 3', mRNA sequence.                                                                                                                                                                                                     | BB458460  |
| 1449190_a_at | 0.1810 | Lysal1        | lysosomal apyrase-like 1                                                                                                                                                                                                                                                                                                             | NM_026174 |
| 1449289_a_at | 0.1810 | B2m           | RIKEN cDNA E130113K22 gene                                                                                                                                                                                                                                                                                                           | BF715219  |
| 1449302_at   | 0.1810 | Abca2         | ATP-binding cassette, sub-family A (ABC1), member 2                                                                                                                                                                                                                                                                                  | NM_007379 |
| 1460670_at   | 0.1810 | Riok3         | RIO kinase 3 (yeast)                                                                                                                                                                                                                                                                                                                 | NM_024182 |
| 1426960_a_at | 0.1813 | Fa2h          | fatty acid 2-hydroxylase                                                                                                                                                                                                                                                                                                             | BM118638  |
| 1452111_at   | 0.1813 | Mrps35        | mitochondrial ribosomal protein S35                                                                                                                                                                                                                                                                                                  | AV304074  |
| 1417026_at   | 0.1814 | Pfdn1         | prefoldin 1                                                                                                                                                                                                                                                                                                                          | BC024693  |
| 1421500_at   | 0.1826 | Sts           | steroid sulfatase                                                                                                                                                                                                                                                                                                                    | NM_009293 |
| 1423764_s_at | 0.1826 | Mrpl37        | mitochondrial ribosomal protein L37                                                                                                                                                                                                                                                                                                  | BC011065  |
| 1424073_at   | 0.1826 | 5430437P03Rik | RIKEN cDNA 5430437P03 gene                                                                                                                                                                                                                                                                                                           | BC005692  |
| 1426209_at   | 0.1826 | Strn4         | striatin, calmodulin binding protein 4                                                                                                                                                                                                                                                                                               | AF414080  |
| 1436236_x_at | 0.1826 | Cotl1         | coactosin-like 1 ( <i>Dictyostelium</i> )                                                                                                                                                                                                                                                                                            | AI327078  |
| 1452272_a_at | 0.1826 | Gfer          | growth factor, erv1 ( <i>S. cerevisiae</i> )-like (augmenter of liver regeneration)                                                                                                                                                                                                                                                  | BI901126  |
| 1419299_at   | 0.1830 | 2010012O05Rik | RIKEN cDNA 2010012O05 gene                                                                                                                                                                                                                                                                                                           | NM_025563 |
| 1439466_s_at | 0.1830 | Ptcd1         | BB001490 RIKEN full-length enriched, 13 days embryo head <i>Mus musculus</i> cDNA clone 3110026K15 3' similar to AF058791 <i>Rattus norvegicus</i> G10 protein homolog ( <i>edg2</i> ) mRNA, mRNA sequence.                                                                                                                          | BB001490  |
| 1418229_s_at | 0.1831 | Hirip5        | histone cell cycle regulation defective interacting protein 5                                                                                                                                                                                                                                                                        | BC018355  |
| 1422977_at   | 0.1831 | Gp1bb         | glycoprotein Ib, beta polypeptide                                                                                                                                                                                                                                                                                                    | NM_010327 |
| 1424708_at   | 0.1831 | 1110014C03Rik | RIKEN cDNA 1110014C03 gene                                                                                                                                                                                                                                                                                                           | BI409239  |
| 1416231_at   | 0.1839 | D8Wsu151e     | synonyms: Trx, Vac14, Tax1bp2, BC032215, MGC38230; cDNA sequence BC032215; Tax1 (human T-cell leukemia virus type I) binding protein 1; Tax1 (human T-cell leukemia virus type I) binding protein 2; vacuole morphology 14 (yeast); <i>Mus musculus</i> DNA segment, Chr 8, Wayne State University 151, expressed (D8Wsu151e), mRNA. | NM_138588 |
| 1416494_at   | 0.1839 | Ndufs5        | NADH dehydrogenase (ubiquinone) Fe-S protein 5                                                                                                                                                                                                                                                                                       | NM_134104 |
| 1416881_at   | 0.1839 | Mcl1          | myeloid cell leukemia sequence 1                                                                                                                                                                                                                                                                                                     | BC003839  |
| 1419352_at   | 0.1839 | 0610007P06Rik | RIKEN cDNA 0610007P06 gene                                                                                                                                                                                                                                                                                                           | BC003916  |
| 1423133_at   | 0.1839 | 0610040D20Rik | RIKEN cDNA 0610040D20 gene                                                                                                                                                                                                                                                                                                           | BG071645  |
| 1423737_at   | 0.1839 | Ndufs3        | NADH dehydrogenase (ubiquinone) Fe-S protein 3                                                                                                                                                                                                                                                                                       | BC027270  |
| 1438391_x_at | 0.1839 | Hadh2         | hydroxyacyl-Coenzyme A dehydrogenase type II                                                                                                                                                                                                                                                                                         | AV078914  |
| 1449381_a_at | 0.1839 | Paccin1       | protein kinase C and casein kinase substrate in neurons 1                                                                                                                                                                                                                                                                            | BI731319  |
| 1449855_s_at | 0.1839 | Uchl3         | ubiquitin carboxyl-terminal esterase L3 (ubiquitin thiolesterase)                                                                                                                                                                                                                                                                    | AB033370  |
| 1450389_s_at | 0.1839 | Pip5k1a       | phosphatidylinositol-4-phosphate 5-kinase, type 1 alpha                                                                                                                                                                                                                                                                              | NM_008846 |
| 1451045_at   | 0.1839 | Syt13         | synaptotagmin 13                                                                                                                                                                                                                                                                                                                     | BE648447  |
| 1451091_at   | 0.1839 | Txndc5        | thioredoxin domain containing 5                                                                                                                                                                                                                                                                                                      | BC016252  |
| 1455640_a_at | 0.1839 | Txn2          | AV053127 <i>Mus musculus</i> pancreas C57BL/6J adult <i>Mus musculus</i> cDNA clone 1810025B13, mRNA sequence.                                                                                                                                                                                                                       | AV053127  |
| 1417511_at   | 0.1841 | Lyar          | Ly1 antibody reactive clone                                                                                                                                                                                                                                                                                                          | NM_025281 |
| 1418072_at   | 0.1841 | Hist1h2bc     | histone 1, H2bc                                                                                                                                                                                                                                                                                                                      | NM_023422 |
| 1419398_a_at | 0.1841 | Dp1           | deleted in polyposis 1                                                                                                                                                                                                                                                                                                               | NM_007874 |
| 1419456_at   | 0.1841 | Dcxr          | dicarbonyl L-xylulose reductase                                                                                                                                                                                                                                                                                                      | BC012247  |
| 1460354_a_at | 0.1841 | Mrpl13        | mitochondrial ribosomal protein L13                                                                                                                                                                                                                                                                                                  | AB049641  |
| 1431208_a_at | 0.1844 | Slc9a3r2      | solute carrier family 9 (sodium/hydrogen exchanger), isoform 3 regulator 2                                                                                                                                                                                                                                                           | BF468098  |
| 1424394_at   | 0.1846 | Sepm          | selenoprotein M                                                                                                                                                                                                                                                                                                                      | AY043488  |
| 1435695_a_at | 0.1846 | A030007L17Rik | RIKEN cDNA A030007L17 gene                                                                                                                                                                                                                                                                                                           | AA673177  |
| 1416836_at   | 0.1851 | Lrp10         | low-density lipoprotein receptor-related protein 10                                                                                                                                                                                                                                                                                  | BC011058  |
| 1417368_s_at | 0.1851 | Ndufa2        | NADH dehydrogenase (ubiquinone) 1 alpha subcomplex, 2                                                                                                                                                                                                                                                                                | NM_010885 |
| 1418588_at   | 0.1851 | Vmp           | vesicular membrain protein p24                                                                                                                                                                                                                                                                                                       | NM_009513 |
| 1418970_a_at | 0.1851 | Bcl10         | B-cell leukemia/lymphoma 10                                                                                                                                                                                                                                                                                                          | AF100339  |
| 1423501_at   | 0.1851 | Max           | Max protein                                                                                                                                                                                                                                                                                                                          | AA617392  |
| 1435873_a_at | 0.1851 | Rpl13a        | Transcribed sequence with strong similarity to protein pir:S29539 ( <i>H.sapiens</i> ) S29539 ribosomal protein L13a, cytosolic - human                                                                                                                                                                                              | AI324936  |

|              |        |               |                                                                                                                                                                                          |           |
|--------------|--------|---------------|------------------------------------------------------------------------------------------------------------------------------------------------------------------------------------------|-----------|
| 1460257_a_at | 0.1851 | Mthfs         | 5, 10-methenyltetrahydrofolate synthetase                                                                                                                                                | NM_026829 |
| 1416285_at   | 0.1862 | Ndufc1        | NADH dehydrogenase (ubiquinone) 1, subcomplex unknown, 1                                                                                                                                 | NM_025523 |
| 1416795_at   | 0.1862 | Cryl1         | crystallin, lamda 1                                                                                                                                                                      | NM_030004 |
| 1417467_a_at | 0.1862 | Tada3l        | transcriptional adaptor 3 (NGG1 homolog, yeast)-like                                                                                                                                     | AK003405  |
| 1417604_at   | 0.1862 | Camk1         | calcium/calmodulin-dependent protein kinase I                                                                                                                                            | NM_133926 |
| 1418226_at   | 0.1862 | Orc2l         | origin recognition complex, subunit 2-like (S. cerevisiae)                                                                                                                               | BB830976  |
| 1421022_x_at | 0.1862 | Acyp1         | acylphosphatase 1, erythrocyte (common) type                                                                                                                                             | NM_025421 |
| 1422778_at   | 0.1862 | Taf9          | TAF9 RNA polymerase II, TATA box binding protein (TBP)-associated factor                                                                                                                 | NM_027139 |
| 1425300_at   | 0.1862 | BC021917      | cDNA sequence BC021917                                                                                                                                                                   | BC021917  |
| 1426658_x_at | 0.1862 | Phgdh         | 3-phosphoglycerate dehydrogenase                                                                                                                                                         | L21027    |
| 1428023_at   | 0.1862 | 3110009E18Rik | RIKEN cDNA 3110009E18 gene                                                                                                                                                               | AA879840  |
| 1434976_x_at | 0.1862 | Eif4ebp1      | AV216412 RIKEN full-length enriched, ES cells Mus musculus cDNA clone 2410160M04 3' similar to U28656 Mus musculus insulin-stimulated eIF-4E binding protein PHAS-I mRNA, mRNA sequence. | AV216412  |
| 1435712_a_at | 0.1862 | Rps18         | Transcribed sequence with strong similarity to protein ref:NP_072045.1 (H.sapiens) ribosomal protein S18; 40S ribosomal protein S18 [Homo sapiens]                                       | AW907444  |
| 1438655_a_at | 0.1862 | 1100001I22Rik | RIKEN cDNA 1100001I22 gene                                                                                                                                                               | AV057789  |
| 1449372_at   | 0.1862 | Dnajc3        | DnaJ (Hsp40) homolog, subfamily C, member 3                                                                                                                                              | BE624323  |
| 1452367_at   | 0.1862 | Coro2a        | tripartite motif-containing 14                                                                                                                                                           | AI316747  |
| 1416417_a_at | 0.1881 | Ndufb7        | calmegin                                                                                                                                                                                 | NM_025843 |
| 1416945_at   | 0.1881 | Ptov1         | prostate tumor over expressed gene 1                                                                                                                                                     | NM_133949 |
| 1417098_s_at | 0.1881 | Nrbf1         | nuclear receptor binding factor 1                                                                                                                                                        | NM_025297 |
| 1419259_at   | 0.1881 | Rsu1          | Ras suppressor protein 1                                                                                                                                                                 | NM_009105 |
| 1434019_at   | 0.1881 | Pdap1         | PDGFA associated protein 1                                                                                                                                                               | BG065186  |
| 1437679_a_at | 0.1881 | Glrx2         | BB172698 RIKEN full-length enriched, adult male hypothalamus Mus musculus cDNA clone A230040G05 3', mRNA sequence.                                                                       | BB172698  |
| 1426241_a_at | 0.1885 | Scmh1         | sex comb on midleg homolog 1                                                                                                                                                             | AB030906  |
| 1436949_a_at | 0.1885 | Tceb2         | AV068352 Mus musculus small intestine C57BL/6J adult Mus musculus cDNA clone 2010303D07, mRNA sequence.                                                                                  | AV068352  |
| 1437164_x_at | 0.1885 | Atp5o         | ATP synthase, H+ transporting, mitochondrial F1 complex, O subunit                                                                                                                       | AV066932  |
| 1415681_at   | 0.1889 | Mrpl43        | mitochondrial ribosomal protein L43                                                                                                                                                      | NM_053164 |
| 1415762_x_at | 0.1889 | Mrpl52        | mitochondrial ribosomal protein L52                                                                                                                                                      | AV021593  |
| 1415932_x_at | 0.1889 | Atp9a         | ATPase, class II, type 9A                                                                                                                                                                | NM_015731 |
| 1416074_a_at | 0.1889 | Rpl28         | ribosomal protein L28                                                                                                                                                                    | NM_009081 |
| 1416349_at   | 0.1889 | Mrpl34        | mitochondrial ribosomal protein L34                                                                                                                                                      | NM_053162 |
| 1416816_at   | 0.1889 | Nek7          | NIMA (never in mitosis gene a)-related expressed kinase 7                                                                                                                                | NM_021605 |
| 1416965_at   | 0.1889 | Pcsk1n        | proprotein convertase subtilisin/kexin type 1 inhibitor                                                                                                                                  | AF181560  |
| 1417103_at   | 0.1889 | Ddt           | D-dopachrome tautomerase                                                                                                                                                                 | NM_010027 |
| 1417124_at   | 0.1889 | Dstn          | destrin                                                                                                                                                                                  | NM_019771 |
| 1417340_at   | 0.1889 | Txn12         | thioredoxin-like 2                                                                                                                                                                       | NM_023140 |
| 1417487_at   | 0.1889 | Fosl1         | fos-like antigen 1                                                                                                                                                                       | U34245    |
| 1417488_at   | 0.1889 | Fosl1         | fos-like antigen 1                                                                                                                                                                       | U34245    |
| 1417722_at   | 0.1889 | Pgls          | 6-phosphogluconolactonase                                                                                                                                                                | BC006594  |
| 1418000_a_at | 0.1889 | Itn2b         | integral membrane protein 2B                                                                                                                                                             | NM_008410 |
| 1418901_at   | 0.1889 | Cebpb         | CCAAT/enhancer binding protein (C/EBP), beta                                                                                                                                             | NM_009883 |
| 1420626_at   | 0.1889 | 2410016F19Rik | RIKEN cDNA 2410016F19 gene                                                                                                                                                               | BF782285  |
| 1422185_a_at | 0.1889 | Dia1          | diaphorase 1 (NADH)                                                                                                                                                                      | NM_029787 |
| 1422615_at   | 0.1889 | Map4k4        | mitogen-activated protein kinase kinase kinase kinase 4                                                                                                                                  | NM_008696 |
| 1423090_x_at | 0.1889 | Sec61g        | Transcribed sequence with strong similarity to protein sp:P38384 (H.sapiens) S61G_HUMAN Protein transport protein SEC61 gamma subunit                                                    | AV216331  |
| 1423967_at   | 0.1889 | Palm          | paralemmalin                                                                                                                                                                             | BC015297  |
| 1424204_at   | 0.1889 | Mrpl13        | mitochondrial ribosomal protein L13                                                                                                                                                      | AB049641  |
| 1424222_s_at | 0.1889 | Rad23b        | Mus musculus cDNA clone IMAGE:3256899, complete cds.                                                                                                                                     | BC006751  |
| 1427939_s_at | 0.1889 | Mycbp         | c-myc binding protein                                                                                                                                                                    | BB046347  |
| 1434882_at   | 0.1889 | 2610103J23Rik | RIKEN cDNA 2610103J23 gene                                                                                                                                                               | AV083741  |

|              |        |               |                                                                                                                                                                                     |           |
|--------------|--------|---------------|-------------------------------------------------------------------------------------------------------------------------------------------------------------------------------------|-----------|
| 1435800_a_at | 0.1889 | Csda          | BB779100 RIKEN full-length enriched, bladder RCB-0544 MBT-2 cDNA Mus musculus cDNA clone G430050O16 3', mRNA sequence.                                                              | BB779100  |
| 1435807_at   | 0.1889 | Cdc42         | cell division cycle 42 homolog ( <i>S. cerevisiae</i> )                                                                                                                             | BF467211  |
| 1438001_x_at | 0.1889 | Dp1           | deleted in polyposis 1                                                                                                                                                              | AV054377  |
| 1448333_at   | 0.1889 | Adprh         | ADP-ribosylarginine hydrolase                                                                                                                                                       | AF244347  |
| 1448971_at   | 0.1889 | 2410022L05Rik | RIKEN cDNA 2410022L05 gene                                                                                                                                                          | NM_025556 |
| 1450795_at   | 0.1889 | Lhb           | luteinizing hormone beta                                                                                                                                                            | NM_008497 |
| 1451071_a_at | 0.1889 | Atp1a1        | ATPase, Na+/K+ transporting, alpha 1 polypeptide                                                                                                                                    | BC025618  |
| 1451399_at   | 0.1889 | Brp17         | brain protein 17                                                                                                                                                                    | BC008274  |
| 1452596_at   | 0.1889 | Polr2k        | polymerase (RNA) II (DNA directed) polypeptide K                                                                                                                                    | AA175187  |
| 1456584_x_at | 0.1889 | Phgdh         | BB495884 RIKEN full-length enriched, 13 days embryo stomach Mus musculus cDNA clone D530050H10 3' similar to L21027 Mus musculus A10 mRNA, mRNA sequence.                           | BB495884  |
| 1452754_at   | 0.1898 | 5730592L21Rik | RIKEN cDNA 5730592L21 gene                                                                                                                                                          | AK017880  |
| 1424900_at   | 0.1903 | Slc29a4       | solute carrier family 29 (nucleoside transporters), member 4                                                                                                                        | BC025599  |
| 1448292_at   | 0.1903 | Uqcr          | ubiquinol-cytochrome c reductase (6.4kD) subunit                                                                                                                                    | NM_025650 |
| 1423242_at   | 0.1904 | Mrps36        | mitochondrial ribosomal protein S36                                                                                                                                                 | BE627004  |
| 1426475_at   | 0.1904 | Hmbs          | Similar to Hydroxymethylbilane synthase (LOC383565), mRNA                                                                                                                           | AI325144  |
| 1449256_a_at | 0.1904 | Rab11a        | RAB11a, member RAS oncogene family                                                                                                                                                  | BC010722  |
| 1429411_a_at | 0.1907 | 1810057B09Rik | RIKEN cDNA 1810057B09 gene                                                                                                                                                          | AI595744  |
| 1435431_at   | 0.1907 | 2310047M15Rik | RIKEN cDNA 2310047M15 gene                                                                                                                                                          | AW558989  |
| 1439451_x_at | 0.1907 | D15Ert747e    | BB487787 RIKEN full-length enriched, 13 days embryo lung Mus musculus cDNA clone D430044J16 3', mRNA sequence.                                                                      | BB487787  |
| 1448656_at   | 0.1907 | Cacnb3        | calcium channel, voltage-dependent, beta 3 subunit                                                                                                                                  | NM_007581 |
| 1427282_a_at | 0.1911 | Frda          | Friedreich ataxia                                                                                                                                                                   | AV007132  |
| 1453467_s_at | 0.1911 | Rps15a        | Transcribed sequence with strong similarity to protein sp:P39027 ( <i>H.sapiens</i> ) RS1A_HUMAN 40S ribosomal protein S15a                                                         | BM207059  |
| 1416021_a_at | 0.1916 | Fabp5         | fatty acid binding protein 5, epidermal                                                                                                                                             | BC002008  |
| 1416265_at   | 0.1916 | Capn10        | calpain 10                                                                                                                                                                          | NM_011796 |
| 1418744_s_at | 0.1916 | Tesc          | tescalcin                                                                                                                                                                           | NM_021344 |
| 1425341_at   | 0.1916 | Kcnk3         | potassium channel, subfamily K, member 3                                                                                                                                            | BF467278  |
| 1426403_at   | 0.1916 | Actr1b        | ARP1 actin-related protein 1 homolog B (yeast)                                                                                                                                      | BG801851  |
| 1437976_x_at | 0.1916 | BC029892      | Similar to 60S ribosomal protein L23a (LOC268449), mRNA                                                                                                                             | C87154    |
| 1448774_at   | 0.1916 | Stoml2        | stomatol (Epb7.2)-like 2                                                                                                                                                            | NM_023231 |
| 1417879_at   | 0.1917 | 1110060M21Rik | RIKEN cDNA 1110060M21 gene                                                                                                                                                          | NM_025424 |
| 1434970_a_at | 0.1919 | Mrpl15        | AV216669 RIKEN full-length enriched, ES cells Mus musculus cDNA clone 2410165L09 3', mRNA sequence.                                                                                 | AV216669  |
| 1436064_x_at | 0.1919 | Rps24         | ribosomal protein S24                                                                                                                                                               | AV004977  |
| 1438656_x_at | 0.1919 | Timm17b       | AV157500 Mus musculus head C57BL/6J 12-day embryo Mus musculus cDNA clone 3010003E09, mRNA sequence.                                                                                | AV157500  |
| 1460724_at   | 0.1919 | Ap2a1         | adaptor protein complex AP-2, alpha 1 subunit                                                                                                                                       | NM_007458 |
| 1421861_at   | 0.1921 | Clstn1        | calsyntenin 1                                                                                                                                                                       | BG065300  |
| 1435112_a_at | 0.1921 | Atp5h         | ATP synthase, H+ transporting, mitochondrial F0 complex, subunit d                                                                                                                  | AV154755  |
| 1456243_x_at | 0.1921 | Mcl1          | BB374534 RIKEN full-length enriched, 16 days embryo head Mus musculus cDNA clone C130075I17 3' similar to U35623 Mus musculus EAT/MCL-1 mRNA, mRNA sequence.                        | BB374534  |
| 1417432_a_at | 0.1922 | Gnb1          | guanine nucleotide binding protein, beta 1                                                                                                                                          | NM_008142 |
| 1421819_a_at | 0.1924 | Set           | SET translocation                                                                                                                                                                   | BF134272  |
| 1438563_s_at | 0.1925 | Mrps24        | AV069725 Mus musculus small intestine C57BL/6J adult Mus musculus cDNA clone 2010312F15, mRNA sequence.                                                                             | AV069725  |
| 1424171_a_at | 0.1927 | Hagh          | hydroxyacyl glutathione hydrolase                                                                                                                                                   | BC004749  |
| 1416133_at   | 0.1929 | C920006C10Rik | Adult male spinal cord cDNA, RIKEN full-length enriched library, clone:A330049K02 product:SIMILAR TO CONSERVED MEMBRANE PROTEIN AT 44E homolog [Mus musculus], full insert sequence | BB188557  |
| 1417562_at   | 0.1929 | Eif4ebp1      | eukaryotic translation initiation factor 4E binding protein 1                                                                                                                       | NM_007918 |
| 1417827_at   | 0.1929 | Ngly1         | N-glycanase 1                                                                                                                                                                       | NM_021504 |
| 1418737_at   | 0.1929 | Nudt2         | nudix (nucleoside diphosphate linked moiety X)-type motif 2                                                                                                                         | NM_025539 |
| 1420820_at   | 0.1929 | 2900073G15Rik | RIKEN cDNA 2900073G15 gene                                                                                                                                                          | NM_026064 |
| 1448623_at   | 0.1929 | 2310075C12Rik | RIKEN cDNA 2310075C12 gene                                                                                                                                                          | NM_133739 |
| 1452925_a_at | 0.1929 | 1810015H18Rik | RIKEN cDNA 1810015H18 gene                                                                                                                                                          | AK009364  |

|              |        |               |                                                                                                                                                                  |           |
|--------------|--------|---------------|------------------------------------------------------------------------------------------------------------------------------------------------------------------|-----------|
| 1460348_at   | 0.1929 | Mad2l2        | MAD2 mitotic arrest deficient-like 2 (yeast)                                                                                                                     | BC011282  |
| 1416520_x_at | 0.1936 | Rpl36         | ribosomal protein L36                                                                                                                                            | NM_018730 |
| 1418896_a_at | 0.1936 | Rpn2          | ribophorin II                                                                                                                                                    | NM_019642 |
| 1460701_a_at | 0.1936 | Mrpl52        | mitochondrial ribosomal protein L52                                                                                                                              | AV021593  |
| 1415714_a_at | 0.1938 | 2610209M04Rik | RIKEN cDNA 2610209M04 gene                                                                                                                                       | BC027564  |
| 1449037_at   | 0.1940 | Crem          | cAMP responsive element modulator                                                                                                                                | AI467599  |
| 1424760_a_at | 0.1942 | Smyd2         | SET and MYND domain containing 2                                                                                                                                 | BC023119  |
| 1427764_a_at | 0.1942 | Tcfe2a        | transcription factor E2a                                                                                                                                         | D29919    |
| 1428515_at   | 0.1942 | 2410012H22Rik | RIKEN cDNA 2410012H22 gene                                                                                                                                       | AK010472  |
| 1434155_a_at | 0.1942 | 2310061104Rik | RIKEN cDNA 2310061104 gene                                                                                                                                       | BB174350  |
| 1434679_at   | 0.1942 | Cspg3         | chondroitin sulfate proteoglycan 3                                                                                                                               | BM945195  |
| 1456616_a_at | 0.1942 | Bsg           | AV035166 Mus musculus adult C57BL/6J placenta Mus musculus cDNA clone 1600013O06, mRNA sequence.                                                                 | AV035166  |
| 1460424_at   | 0.1942 | 1810008O21Rik | RIKEN cDNA 1810008O21 gene                                                                                                                                       | BI411309  |
| 1422186_s_at | 0.1943 | Dia1          | diaphorase 1 (NADH)                                                                                                                                              | NM_029787 |
| 1415974_at   | 0.1947 | Map2k2        | mitogen activated protein kinase kinase 2                                                                                                                        | AW553456  |
| 1416257_at   | 0.1950 | Capn2         | calpain 2                                                                                                                                                        | NM_009794 |
| 1426596_a_at | 0.1950 | Smn           | survival motor neuron                                                                                                                                            | BB821035  |
| 1429104_at   | 0.1950 | 0610025L06Rik | RIKEN cDNA 0610025L06 gene                                                                                                                                       | AK012581  |
| 1435869_s_at | 0.1950 | Ap2a2         | ES cells cDNA, RIKEN full-length enriched library, clone:2410074K14 product:expressed sequence AW146353, full insert sequence                                    | BQ175609  |
| 1444952_a_at | 0.1950 | 8430423A01Rik | RIKEN cDNA 8430423A01 gene                                                                                                                                       | BB260383  |
| 1448344_at   | 0.1950 | Rps12         | ribosomal protein S12                                                                                                                                            | NM_011295 |
| 1427295_at   | 0.1952 | 1810073N04Rik | RIKEN cDNA 1810073N04 gene                                                                                                                                       | BB406585  |
| 1427119_at   | 0.1953 | Spink4        | serine protease inhibitor, Kazal type 4                                                                                                                          | AV066321  |
| 1423959_at   | 0.1957 | AV047578      | expressed sequence AV047578                                                                                                                                      | AF305427  |
| 1437975_a_at | 0.1957 | BC029892      | Similar to 60S ribosomal protein L23a (LOC268449), mRNA                                                                                                          | C87154    |
| 1451895_a_at | 0.1963 |               | Mus musculus mRNA similar to dual specificity phosphatase 9 (cDNA clone MGC:6681 IMAGE:3501447), complete cds.                                                   | BC004738  |
| 1422525_at   | 0.1965 | Atp5k         | ATP synthase, H+ transporting, mitochondrial F1F0 complex, subunit e                                                                                             | NM_007507 |
| 1435413_x_at | 0.1965 | 2700060E02Rik | AV167958 Mus musculus head C57BL/6J 13-day embryo Mus musculus cDNA clone 3110059K19, mRNA sequence.                                                             | AV167958  |
| 1449482_at   | 0.1965 | Hist3h2ba     | histone 3, H2ba                                                                                                                                                  | NM_030082 |
| 1456036_x_at | 0.1965 | Gsto1         | glutathione S-transferase omega 1                                                                                                                                | AV003026  |
| 1422593_at   | 0.1967 | Ap3s1         | adaptor-related protein complex 3, sigma 1 subunit                                                                                                               | NM_009681 |
| 1426680_at   | 0.1973 | Sepr1         | RIKEN cDNA 1110019112 gene                                                                                                                                       | AK003819  |
| 1426245_s_at | 0.1979 | Mapre2        | microtubule-associated protein, RP/EB family, member 2                                                                                                           | BC027056  |
| 1455283_x_at | 0.1994 | Ndufs8        | Transcribed sequence with moderate similarity to protein sp:O00217 (H.sapiens) NUIM_HUMAN NADH-ubiquinone oxidoreductase 23 kDa subunit, mitochondrial precursor | BB453395  |
| 1456226_x_at | 0.1994 | Ddr1          | discoidin domain receptor family, member 1                                                                                                                       | BB234940  |
| 1415876_a_at | 0.1997 | Rps26         | ribosomal protein S26                                                                                                                                            | NM_013765 |
| 1416948_at   | 0.1997 | Mrpl23        | mitochondrial ribosomal protein L23                                                                                                                              | NM_011288 |
| 1419544_at   | 0.1997 | Atp6v1c1      | ATPase, H+ transporting, V1 subunit C, isoform 1                                                                                                                 | AA987147  |
| 1434230_at   | 0.1997 | Polb          | polymerase (DNA directed), beta                                                                                                                                  | BG094331  |
| 1449003_a_at | 0.1997 | Vti1b         | vesicle transport through interaction with t-SNAREs 1B homolog                                                                                                   | NM_016800 |
| 1451998_at   | 0.1997 | 4930485D02Rik | RIKEN cDNA 4930485D02 gene                                                                                                                                       | BC024597  |
| 1416764_at   | 0.2004 | Ttc11         | tetratricopeptide repeat domain 11                                                                                                                               | NM_025562 |
| 1418318_at   | 0.2004 | Rnf128        | ring finger protein 128                                                                                                                                          | AK004847  |
| 1418704_at   | 0.2004 | S100a13       | S100 calcium binding protein A13                                                                                                                                 | NM_009113 |
| 1418991_at   | 0.2004 | Bak1          | BCL2-antagonist/killer 1                                                                                                                                         | NM_007523 |
| 1428257_s_at | 0.2004 | Dncl2a        | dynein, cytoplasmic, light chain 2A                                                                                                                              | BG791323  |
| 1428608_at   | 0.2004 | Mylc2b        | RIKEN cDNA 1500001M02 gene                                                                                                                                       | AW494458  |
| 1433520_at   | 0.2004 | Scap          | Sreb cleavage-activating protein                                                                                                                                 | BI412871  |
| 1449299_at   | 0.2004 | Lrp5          | low density lipoprotein receptor-related protein 5                                                                                                               | BC011374  |
| 1454807_a_at | 0.2004 | Snx12         | sorting nexin 12                                                                                                                                                 | BB414983  |
| 1416842_at   | 0.2010 | Gstm5         | glutathione S-transferase, mu 5                                                                                                                                  | NM_010360 |
| 1424490_at   | 0.2011 | 2410005H09Rik | RIKEN cDNA 2410005H09 gene                                                                                                                                       | BC024802  |
| 1423231_at   | 0.2017 | Nrgn          | neurogranin                                                                                                                                                      | AK002933  |

|              |        |               |                                                                                                                                                                                            |           |
|--------------|--------|---------------|--------------------------------------------------------------------------------------------------------------------------------------------------------------------------------------------|-----------|
| 1438647_x_at | 0.2025 | Cetn2         | BB503830 RIKEN full-length enriched, 0 day neonate kidney Mus musculus cDNA clone D630045F01 3', mRNA sequence.                                                                            | BB503830  |
| 1423897_at   | 0.2027 | 2410016F01Rik | RIKEN cDNA 2410016F01 gene                                                                                                                                                                 | AW488376  |
| 1416567_s_at | 0.2041 | Atp5e         | ATP synthase, H+ transporting, mitochondrial F1 complex, epsilon subunit                                                                                                                   | NM_025983 |
| 1416671_a_at | 0.2041 | Mcoln1        | mucolin 1                                                                                                                                                                                  | NM_053177 |
| 1416765_s_at | 0.2041 | Magmas        | mitochondria-associated protein involved in granulocyte-macrophage colony-stimulating factor signal transduction                                                                           | NM_025571 |
| 1418701_at   | 0.2041 | Comt          | catechol-O-methyltransferase                                                                                                                                                               | NM_007744 |
| 1423151_at   | 0.2041 | Dnajb11       | DnaJ (Hsp40) homolog, subfamily B, member 11                                                                                                                                               | AK010861  |
| 1450560_a_at | 0.2041 | Ppp2r5d       | protein phosphatase 2, regulatory subunit B (B56), delta isoform                                                                                                                           | NM_009358 |
| 1450640_x_at | 0.2041 | Atp5k         | ATP synthase, H+ transporting mitochondrial F1F0 complex, subunit e                                                                                                                        | NM_007507 |
| 1450903_at   | 0.2041 | Rad23b        | RAD23b homolog (S. cerevisiae)                                                                                                                                                             | BF138887  |
| 1452490_a_at | 0.2041 | Ap2a2         | adaptor protein complex AP-2, alpha 2 subunit                                                                                                                                              | BC010597  |
| 1452585_at   | 0.2041 | Mrps28        | mitochondrial ribosomal protein S28                                                                                                                                                        | AK011036  |
| 1454860_x_at | 0.2041 | Dad1          | defender against cell death 1                                                                                                                                                              | BI966630  |
| 1455749_x_at | 0.2041 | Ndufa7        | NADH dehydrogenase (ubiquinone) 1 alpha subcomplex, 7 (B14.5a)                                                                                                                             | C88880    |
| 1460360_at   | 0.2041 | Asrgl1        | asparaginase like 1                                                                                                                                                                        | AU040643  |
| 1419036_at   | 0.2042 | Csnk2a1       | casein kinase II, alpha 1 polypeptide                                                                                                                                                      | BB283759  |
| 1452579_at   | 0.2050 | 2310020H20Rik | RIKEN cDNA 2310020H20 gene                                                                                                                                                                 | AK009021  |
| 1417976_at   | 0.2052 | Ada           | adenosine deaminase                                                                                                                                                                        | NM_007398 |
| 1420513_at   | 0.2062 | 1700073K01Rik | RIKEN cDNA 1700073K01 gene                                                                                                                                                                 | BC025062  |
| 1449194_at   | 0.2062 | Mrps25        | mitochondrial ribosomal protein S25                                                                                                                                                        | AK004037  |
| 1453564_a_at | 0.2062 | Vps24         | RIKEN cDNA 4921505F14 gene                                                                                                                                                                 | AK014818  |
| 1415671_at   | 0.2071 | Atp6v0d1      | ATPase, H+ transporting, V0 subunit D isoform 1                                                                                                                                            | NM_013477 |
| 1416020_a_at | 0.2071 | Atp5g1        | ATP synthase, H+ transporting, mitochondrial F0 complex, subunit c (subunit 9), isoform 1                                                                                                  | NM_007506 |
| 1416243_a_at | 0.2071 | Rpl35         | ribosomal protein L35                                                                                                                                                                      | NM_025592 |
| 1416341_at   | 0.2071 | Polr2c        | polymerase (RNA) II (DNA directed) polypeptide C                                                                                                                                           | NM_009090 |
| 1416412_at   | 0.2071 | Nsmaf         | neutral sphingomyelinase (N-SMase) activation associated factor                                                                                                                            | NM_010945 |
| 1416713_at   | 0.2071 | 2700055K07Rik | RIKEN cDNA 2700055K07 gene                                                                                                                                                                 | NM_026481 |
| 1418010_a_at | 0.2071 | Sh3glb1       | SH3-domain GRB2-like B1 (endophilin)                                                                                                                                                       | BB221842  |
| 1422506_a_at | 0.2071 | Cstb          | cystatin B                                                                                                                                                                                 | NM_007793 |
| 1423680_at   | 0.2071 | Fads1         | RIKEN cDNA 0710001O03 gene                                                                                                                                                                 | BC026831  |
| 1424095_at   | 0.2071 | Rtcd1         | RNA terminal phosphate cyclase domain 1                                                                                                                                                    | BC016519  |
| 1426964_at   | 0.2071 | 3110003A17Rik | RIKEN cDNA 3110003A17 gene                                                                                                                                                                 | AK013984  |
| 1427481_a_at | 0.2071 | Atp1a3        | ATPase, Na+/K+ transporting, alpha 3 polypeptide                                                                                                                                           | BC027114  |
| 1427604_a_at | 0.2071 | Atp9a         | ATPase, class II, type 9A                                                                                                                                                                  | AF011336  |
| 1429723_at   | 0.2071 | 6330409N04Rik | RIKEN cDNA 6330409N04 gene                                                                                                                                                                 | AK018153  |
| 1434637_x_at | 0.2071 | Sin3b         | transcriptional regulator, SIN3B (yeast)                                                                                                                                                   | BF017589  |
| 1434883_at   | 0.2071 | 2610103J23Rik | RIKEN cDNA 2610103J23 gene                                                                                                                                                                 | AV083741  |
| 1434924_at   | 0.2071 | Phf2          | PHD finger protein 2                                                                                                                                                                       | BF468039  |
| 1435735_x_at | 0.2071 | H47           | BB285733 RIKEN full-length enriched, 2 cells egg Mus musculus cDNA clone B020007I03 3', mRNA sequence.                                                                                     | BB285733  |
| 1435755_at   | 0.2071 | 1110001A16Rik | RIKEN cDNA 1110001A16 gene                                                                                                                                                                 | BB609468  |
| 1437947_x_at | 0.2071 | Vdac1         | AV036172 Mus musculus adult C57BL/6J placenta Mus musculus cDNA clone 1600017H06, mRNA sequence.                                                                                           | AV036172  |
| 1438948_x_at | 0.2071 | Bzrp          | AV101079 Mus musculus C57BL/6J ES cell Mus musculus cDNA clone 2410071K12, mRNA sequence.                                                                                                  | AV101079  |
| 1439444_x_at | 0.2071 | 1110014C03Rik | AV213456 RIKEN full-length enriched, ES cells Mus musculus cDNA clone 2410127P20 3' similar to AJ004912 Rattus norvegicus mRNA for integral membrane protein Tmp21-l (p23), mRNA sequence. | AV213456  |
| 1448247_at   | 0.2071 | Bcl7b         | B-cell CLL/lymphoma 7B                                                                                                                                                                     | NM_009745 |
| 1448699_at   | 0.2071 | Mrpl54        | mitochondrial ribosomal protein L54                                                                                                                                                        | NM_025317 |
| 1449429_at   | 0.2071 | Fkbp1b        | FK506 binding protein 1b                                                                                                                                                                   | NM_016863 |
| 1450519_a_at | 0.2071 | Prkaca        | protein kinase, cAMP dependent, catalytic, alpha                                                                                                                                           | M12303    |
| 1450668_s_at | 0.2071 | Hspe1         | heat shock protein 1 (chaperonin 10)                                                                                                                                                       | NM_008303 |
| 1450727_a_at | 0.2071 | Holdip2       | polymerase (DNA-directed), delta interacting protein 2                                                                                                                                     | NM_026389 |
| 1451229_at   | 0.2071 | Hdac11        | histone deacetylase 11                                                                                                                                                                     | BC016208  |
| 1451745_a_at | 0.2071 | Znhit1        | zinc finger, HIT domain containing 1                                                                                                                                                       | BC026751  |

|              |        |               |                                                                                                                                                                                                              |           |
|--------------|--------|---------------|--------------------------------------------------------------------------------------------------------------------------------------------------------------------------------------------------------------|-----------|
| 1452048_at   | 0.2071 | Mrpl12        | mitochondrial ribosomal protein L12                                                                                                                                                                          | AK002757  |
| 1456540_s_at | 0.2071 | Mtmr6         | BB297632 RIKEN full-length enriched, 9.5 days embryo parthenogenote <i>Mus musculus</i> cDNA clone B130063F15 3' similar to AF072928 <i>Homo sapiens</i> myotubularin related protein 6 mRNA, mRNA sequence. | BB297632  |
| 1460581_a_at | 0.2071 | Rpl13         | Transcribed sequence with strong similarity to protein ref:NP_150254.1 ( <i>H.sapiens</i> ) ribosomal protein L13; 60S ribosomal protein L13; breast basic conserved protein 1 [ <i>Homo sapiens</i> ]       | AI506565  |
| 1420875_at   | 0.2079 | Ptk9          | protein tyrosine kinase 9                                                                                                                                                                                    | BI662615  |
| 1424013_at   | 0.2079 | Etf1          | eukaryotic translation termination factor 1                                                                                                                                                                  | BC013717  |
| 1426661_at   | 0.2079 | Rpl27a        | ribosomal protein L27a                                                                                                                                                                                       | BG807647  |
| 1438166_x_at | 0.2079 | Ndufs4        | NADH dehydrogenase (ubiquinone) Fe-S protein 4                                                                                                                                                               | AV219958  |
| 1448234_at   | 0.2079 | Dnajb6        | DnaJ (Hsp40) homolog, subfamily B, member 6                                                                                                                                                                  | NM_011847 |
| 1448298_at   | 0.2079 | Tnk2          | tyrosine kinase, non-receptor, 2                                                                                                                                                                             | NM_016788 |
| 1453256_at   | 0.2079 | Polr3c        | RIKEN cDNA 4933407E01 gene                                                                                                                                                                                   | BB772197  |
| 1455727_at   | 0.2079 | U2af1-rs2     | U2 small nuclear ribonucleoprotein auxiliary factor (U2AF) 1, related sequence 2                                                                                                                             | AW542140  |
| 1456495_s_at | 0.2079 | Osbpl6        | oxysterol binding protein-like 6                                                                                                                                                                             | BG070848  |
| 1418234_s_at | 0.2080 | Bcas2         | breast carcinoma amplified sequence 2                                                                                                                                                                        | NM_026602 |
| 1426811_at   | 0.2080 | Ppp2r5b       | glycoprotein hormone alpha 2                                                                                                                                                                                 | BB080065  |
| 1437043_a_at | 0.2080 | 1110012M11Rik | RIKEN cDNA 1110012M11 gene                                                                                                                                                                                   | AV012400  |
| 1448295_at   | 0.2080 | D13Wsu50e     | DNA segment, Chr 13, Wayne State University 50, expressed                                                                                                                                                    | NM_138596 |
| 1448543_at   | 0.2080 | 2310042G06Rik | RIKEN cDNA 2310042G06 gene                                                                                                                                                                                   | NM_025531 |
| 1451217_a_at | 0.2080 | 1500034J20Rik | RIKEN cDNA 1500034J20 gene                                                                                                                                                                                   | BC008259  |
| 1453569_s_at | 0.2080 | Mark4         | MAP/microtubule affinity-regulating kinase 4                                                                                                                                                                 | AK010751  |
| 1417295_at   | 0.2083 | Mta1          | metastasis associated 1                                                                                                                                                                                      | NM_054081 |
| 1415981_at   | 0.2087 | 5031400M07Rik | RIKEN cDNA 5031400M07 gene                                                                                                                                                                                   | AV258950  |
| 1418249_at   | 0.2087 | Crcp          | calcitonin gene-related peptide-receptor component protein                                                                                                                                                   | NM_007761 |
| 1423766_at   | 0.2087 | Pak1ip1       | PAK1 interacting protein 1 LocusID: 55003                                                                                                                                                                    | AF386076  |
| 1417285_a_at | 0.2088 | Ndufa5        | NADH dehydrogenase (ubiquinone) 1 alpha subcomplex, 5                                                                                                                                                        | NM_026614 |
| 1423746_at   | 0.2088 | Txndc5        | thioredoxin domain containing 5                                                                                                                                                                              | BC016252  |
| 1433472_x_at | 0.2088 | Rpl38         | RIKEN cDNA 0610025G13 gene                                                                                                                                                                                   | AA050777  |
| 1435734_x_at | 0.2088 | 1110032N12Rik | BB396413 RIKEN full-length enriched, 0 day neonate cerebellum <i>Mus musculus</i> cDNA clone C230097H11 3', mRNA sequence.                                                                                   | BB396413  |
| 1426529_a_at | 0.2090 | Tagln2        | transgelin 2                                                                                                                                                                                                 | C76322    |
| 1460641_a_at | 0.2090 | 3100004P22Rik | RIKEN cDNA 3100004P22 gene                                                                                                                                                                                   | NM_133693 |
| 1420776_a_at | 0.2093 | Auh           | AU RNA binding protein/enoyl-coenzyme A hydratase                                                                                                                                                            | NM_016709 |
| 1416696_at   | 0.2113 | D17Wsu104e    | interleukin 25                                                                                                                                                                                               | NM_080837 |
| 1424628_a_at | 0.2113 | 1500032D16Rik | RIKEN cDNA 1500032D16 gene                                                                                                                                                                                   | BC013640  |
| 1436783_x_at | 0.2113 | Ywhab         | tyrosine 3-monooxygenase/tryptophan 5-monooxygenase activation protein, beta polypeptide                                                                                                                     | AV021552  |
| 1436542_at   | 0.2119 | Ptger1        | prostaglandin E receptor 1 (subtype EP1)                                                                                                                                                                     | BE948730  |
| 1415948_at   | 0.2120 | Creg          | cellular repressor of E1A-stimulated genes                                                                                                                                                                   | BC027426  |
| 1416605_at   | 0.2120 | Nola2         | nucleolar protein family A, member 2                                                                                                                                                                         | BC024944  |
| 1417869_s_at | 0.2120 | Ctsz          |                                                                                                                                                                                                              | NM_022325 |
| 1420833_at   | 0.2120 | Vamp2         | vesicle-associated membrane protein 2                                                                                                                                                                        | BG871810  |
| 1427347_s_at | 0.2120 | Tubb2         | tubulin, beta 2                                                                                                                                                                                              | BC003475  |
| 1439234_a_at | 0.2120 | 2410018G23Rik | RIKEN cDNA 2410018G23 gene                                                                                                                                                                                   | BE200117  |
| 1448745_s_at | 0.2120 | Lor           | loricrin                                                                                                                                                                                                     | NM_008508 |
| 1448824_at   | 0.2120 | Ube2j1        | ubiquitin-conjugating enzyme E2, J1                                                                                                                                                                          | NM_019586 |
| 1449964_a_at | 0.2120 | Mlycd         | malonyl-CoA decarboxylase                                                                                                                                                                                    | NM_019966 |
| 1451386_at   | 0.2120 | Blvrb         | biliverdin reductase B (flavin reductase (NADPH))                                                                                                                                                            | BC027279  |
| 1418625_s_at | 0.2124 | LOC14433      | glyceraldehyde-3-phosphate dehydrogenase                                                                                                                                                                     | NM_008084 |
| 1448595_a_at | 0.2124 | Rex3          | reduced expression 3                                                                                                                                                                                         | NM_009052 |
| 1424638_at   | 0.2130 | Cdkn1a        | cyclin-dependent kinase inhibitor 1A (P21)                                                                                                                                                                   | AK007630  |
| 1426254_at   | 0.2130 | Bbp           | beta-amyloid binding protein precursor                                                                                                                                                                       | AF353993  |
| 1452370_s_at | 0.2130 | B230208H17Rik | RIKEN cDNA B230208H17 gene                                                                                                                                                                                   | BB449608  |
| 1418430_at   | 0.2132 | Kif5b         | kinesin family member 5B                                                                                                                                                                                     | BI328541  |
| 1419419_at   | 0.2132 | D0H6S2654E    |                                                                                                                                                                                                              | NM_138746 |

|              |        |               |                                                                                                                                                                                                                                                                                                                                                        |           |
|--------------|--------|---------------|--------------------------------------------------------------------------------------------------------------------------------------------------------------------------------------------------------------------------------------------------------------------------------------------------------------------------------------------------------|-----------|
| 1422451_at   | 0.2132 | Mrps21        | mitochondrial ribosomal protein S21                                                                                                                                                                                                                                                                                                                    | NM_078479 |
| 1426982_at   | 0.2132 | E030034P13Rik | RIKEN cDNA E030034P13 gene                                                                                                                                                                                                                                                                                                                             | BB477613  |
| 1438776_x_at | 0.2132 | Rps17         | AV046534 Mus musculus adult C57BL/6J testis Mus musculus cDNA clone 1700057O18, mRNA sequence.                                                                                                                                                                                                                                                         | AV046534  |
| 1438173_x_at | 0.2136 | Pmf1          | AV307393 RIKEN full-length enriched, 8 days embryo Mus musculus cDNA clone 5730552G08 3', mRNA sequence.                                                                                                                                                                                                                                               | AV307393  |
| 1423906_at   | 0.2137 | Hsbp1         | unnamed protein product; SIMILAR TO HEAT SHOCK FACTOR BINDING PROTEIN 1[Mus musculus] (SPTR Q9CQZ1, evidence: FASTY, 100%ID, 100%length, match=228) putative; Mus musculus 13 days embryo liver cDNA, RIKEN full-length enriched library, clone:2510008P16 product:SIMILAR TO HEAT SHOCK FACTOR BINDING PROTEIN 1[Mus musculus], full insert sequence. | AK010939  |
| 1437767_s_at | 0.2137 | Fts           | retinoblastoma-like 2                                                                                                                                                                                                                                                                                                                                  | AA138720  |
| 1423448_at   | 0.2139 | Rab11b        | RAB11B, member RAS oncogene family                                                                                                                                                                                                                                                                                                                     | BE986863  |
| 1416337_at   | 0.2144 | Uqcrb         | ubiquinol-cytochrome c reductase binding protein                                                                                                                                                                                                                                                                                                       | NM_026219 |
| 1418506_a_at | 0.2146 | Prdx2         | peroxiredoxin 2                                                                                                                                                                                                                                                                                                                                        | NM_011563 |
| 1420843_at   | 0.2146 | Ptprf         | protein tyrosine phosphatase, receptor type, F                                                                                                                                                                                                                                                                                                         | BF235516  |
| 1452181_at   | 0.2146 | Ckap4         | BB312117 RIKEN full-length enriched, adult male corpora quadrigemina Mus musculus cDNA clone B230331K02 3' similar to X69910 H.sapiens p63 mRNA for transmembrane protein, mRNA sequence.                                                                                                                                                              | BB312117  |
| 1417507_at   | 0.2147 | Cyb561        | cytochrome b-561                                                                                                                                                                                                                                                                                                                                       | BC006732  |
| 1415747_s_at | 0.2151 | Riok3         | RIO kinase 3 (yeast)                                                                                                                                                                                                                                                                                                                                   | C80812    |
| 1437423_a_at | 0.2154 | Sra1          | steroid receptor RNA activator 1                                                                                                                                                                                                                                                                                                                       | BG074964  |
| 1434507_at   | 0.2156 | Npepl1        | aminopeptidase-like 1                                                                                                                                                                                                                                                                                                                                  | BG076209  |
| 1416742_at   | 0.2157 | Cfdp          | craniofacial development protein 1                                                                                                                                                                                                                                                                                                                     | NM_011801 |
| 1417311_at   | 0.2157 | Crip2         | cysteine rich protein 2                                                                                                                                                                                                                                                                                                                                | NM_024223 |
| 1423105_a_at | 0.2157 | Gas41         | glioma-amplified sequence-41                                                                                                                                                                                                                                                                                                                           | AK105222  |
| 1423364_a_at | 0.2157 | Fts           | fused toes                                                                                                                                                                                                                                                                                                                                             | AW490901  |
| 1423425_at   | 0.2157 | 1300012G16Rik | RIKEN cDNA 1300012G16 gene                                                                                                                                                                                                                                                                                                                             | BB018522  |
| 1426733_at   | 0.2157 | Itpk1         | inositol 1,3,4-triphosphate 5/6 kinase                                                                                                                                                                                                                                                                                                                 | AW552407  |
| 1426998_at   | 0.2157 | Tex27         | testis expressed gene 27                                                                                                                                                                                                                                                                                                                               | BG976649  |
| 1439235_x_at | 0.2157 | 2410018G23Rik | RIKEN cDNA 2410018G23 gene                                                                                                                                                                                                                                                                                                                             | BE200117  |
| 1451712_at   | 0.2157 | 8030411F24Rik | RIKEN cDNA 8030411F24 gene                                                                                                                                                                                                                                                                                                                             | AF440735  |
| 1456241_a_at | 0.2157 | 1810073N04Rik | BB315716 RIKEN full-length enriched, adult male corpora quadrigemina Mus musculus cDNA clone B230359J01 3', mRNA sequence.                                                                                                                                                                                                                             | BB315716  |
| 1456436_x_at | 0.2157 | Rps20         | ribosomal protein S20                                                                                                                                                                                                                                                                                                                                  | AV002845  |
| 1416606_s_at | 0.2158 | Nola2         | nucleolar protein family A, member 2                                                                                                                                                                                                                                                                                                                   | BC024944  |
| 1450696_at   | 0.2161 | Psmb9         | proteasome (prosome, macropain) subunit, beta type 9 (large multifunctional protease 2)                                                                                                                                                                                                                                                                | NM_013585 |
| 1416810_at   | 0.2163 | Mea1          | male enhanced antigen 1                                                                                                                                                                                                                                                                                                                                | BC013344  |
| 1450916_at   | 0.2163 | Stau2         | staufer (RNA binding protein) homolog 2 (Drosophila)                                                                                                                                                                                                                                                                                                   | A1843206  |
| 1416990_at   | 0.2164 | Rxb1          | retinoid X receptor beta                                                                                                                                                                                                                                                                                                                               | BC019432  |
| 1417978_at   | 0.2164 | 1300018P11Rik | RIKEN cDNA 1300018P11 gene                                                                                                                                                                                                                                                                                                                             | BC027014  |
| 1427180_at   | 0.2164 | Slc27a3       | solute carrier family 27 (fatty acid transporter), member 3                                                                                                                                                                                                                                                                                            | BB147793  |
| 1435395_s_at | 0.2164 | Atp5j2        | ATP synthase, H+ transporting, mitochondrial F0 complex, subunit f, isoform 2                                                                                                                                                                                                                                                                          | BG794445  |
| 1453199_at   | 0.2164 | Acbd6         | acyl-Coenzyme A binding domain containing 6                                                                                                                                                                                                                                                                                                            | AK011781  |
| 1417102_a_at | 0.2168 | Ndufb5        | NADH dehydrogenase (ubiquinone) 1 beta subcomplex, 5                                                                                                                                                                                                                                                                                                   | BC025155  |
| 1417286_at   | 0.2168 | Ndufa5        | NADH dehydrogenase (ubiquinone) 1 alpha subcomplex, 5                                                                                                                                                                                                                                                                                                  | NM_026614 |
| 1417460_at   | 0.2168 | Ifitm2        | interferon induced transmembrane protein 2                                                                                                                                                                                                                                                                                                             | NM_030694 |
| 1418085_at   | 0.2168 | Prkcz         | protein kinase C, zeta                                                                                                                                                                                                                                                                                                                                 | NM_008860 |
| 1420613_at   | 0.2168 | Ptp4a2        | protein tyrosine phosphatase 4a2                                                                                                                                                                                                                                                                                                                       | BE134116  |
| 1424037_at   | 0.2168 | Itpka         | inositol 1,4,5-trisphosphate 3-kinase A                                                                                                                                                                                                                                                                                                                | BC027291  |
| 1424791_a_at | 0.2168 | Lu            | Lutheran blood group (Auberger b antigen included)                                                                                                                                                                                                                                                                                                     | BC004826  |
| 1426738_at   | 0.2168 | Dgkz          | diacylglycerol kinase zeta                                                                                                                                                                                                                                                                                                                             | BC014860  |
| 1427511_at   | 0.2168 | B2m           | beta-2 microglobulin                                                                                                                                                                                                                                                                                                                                   | AA170322  |
| 1428331_at   | 0.2168 | 2210016F16Rik | RIKEN cDNA 2210016F16 gene                                                                                                                                                                                                                                                                                                                             | BB547211  |
| 1438317_a_at | 0.2168 | Endog         | AV104666 Mus musculus liver C57BL/6J 13-day embryo Mus musculus cDNA clone 2510008K06, mRNA sequence.                                                                                                                                                                                                                                                  | AV104666  |



|              |        |               |                                                                                                                                      |           |
|--------------|--------|---------------|--------------------------------------------------------------------------------------------------------------------------------------|-----------|
| 1438982_s_at | 0.2168 | 2810417J12Rik | BB251185 RIKEN full-length enriched, 7 days neonate cerebellum Mus musculus cDNA clone A730045B05 3', mRNA sequence.                 | BB251185  |
| 1451379_at   | 0.2168 | Rab22a        | RAB22A, member RAS oncogene family                                                                                                   | BC006596  |
| 1453412_a_at | 0.2168 | Sec14l1       | SEC14-like 1 (S. cerevisiae)                                                                                                         | BI652727  |
| 1455129_at   | 0.2169 | 2610103J23Rik | RIKEN cDNA 2610103J23 gene                                                                                                           | AV083741  |
| 1422678_at   | 0.2170 | Dgat2         | diacylglycerol O-acyltransferase 2                                                                                                   | AK002443  |
| 1432444_a_at | 0.2170 | 1810011O16Rik | RIKEN cDNA 1810011O16 gene                                                                                                           | AK012800  |
| 1417331_a_at | 0.2172 | Arl6          | myc induced nuclear antigen                                                                                                          | NM_019665 |
| 1435429_x_at | 0.2172 | Rps27l        | ribosomal protein S27-like                                                                                                           | AV111399  |
| 1448737_at   | 0.2172 | Tm4sf2        | transmembrane 4 superfamily member 2                                                                                                 | AF052492  |
| 1459986_a_at | 0.2172 | Rps17         | ribosomal protein S17                                                                                                                | NM_009092 |
| 1418263_at   | 0.2174 | Ddx25         | DEAD (Asp-Glu-Ala-Asp) box polypeptide 25                                                                                            | BC024852  |
| 1423152_at   | 0.2174 | Vapb          | vesicle-associated membrane protein, associated protein B and C                                                                      | BF303544  |
| 1423676_at   | 0.2174 | Atp5h         | ATP synthase, H <sup>+</sup> transporting, mitochondrial F0 complex, subunit d                                                       | AF354051  |
| 1429708_at   | 0.2174 | Ndufa11       | NADH dehydrogenase (ubiquinone) 1 alpha subcomplex                                                                                   | AA596846  |
| 1435232_x_at | 0.2174 | Mpl15         | mitochondrial ribosomal protein L15                                                                                                  | BI791064  |
| 1448353_x_at | 0.2174 | Rpn1          | ribophorin I                                                                                                                         | NM_133933 |
| 1452506_a_at | 0.2174 | 0710007A14Rik | RIKEN cDNA 0710007A14 gene                                                                                                           | BC011427  |
| 1454716_x_at | 0.2174 | Cox5b         | cytochrome c oxidase, subunit Vb                                                                                                     | AA960638  |
| 1455106_a_at | 0.2174 | Ckb           | creatine kinase, brain                                                                                                               | BG967663  |
| 1456663_x_at | 0.2174 | 2410018G23Rik | BB718785 RIKEN full-length enriched, adult male liver tumor Mus musculus cDNA clone C730019F01 3', mRNA sequence.                    | BB718785  |
| 1427029_at   | 0.2175 | 9530081K03Rik | RIKEN cDNA 9530081K03 gene                                                                                                           | AK008764  |
| 1418089_at   | 0.2179 | Stx8          | syntaxin 8                                                                                                                           | NM_018768 |
| 1418202_a_at | 0.2179 | Wiz           | widely-interspaced zinc finger motifs                                                                                                | NM_011717 |
| 1418936_at   | 0.2179 | Maff          | v-maf musculoaponeurotic fibrosarcoma oncogene family, protein F (avian)                                                             | BC022952  |
| 1420879_a_at | 0.2179 | Ywhab         | tyrosine 3-monooxygenase/tryptophan 5-monooxygenase activation protein, beta polypeptide                                             | NM_018753 |
| 1421817_at   | 0.2179 | Gsr           | glutathione reductase 1                                                                                                              | AK019177  |
| 1423574_s_at | 0.2179 | Srd5a2l       | steroid 5 alpha-reductase 2-like                                                                                                     | BB206480  |
| 1423993_at   | 0.2179 | Atp6v1f       | ATPase, H <sup>+</sup> transporting, V1 subunit F                                                                                    | BC016553  |
| 1424660_s_at | 0.2179 | 4632407F12Rik | RIKEN cDNA 4632407F12 gene                                                                                                           | BC023091  |
| 1424763_at   | 0.2179 | 1700027N10Rik | RIKEN cDNA 1700027N10 gene                                                                                                           | BC019423  |
| 1425806_a_at | 0.2179 | Surb7         | SRB7 (supressor of RNA polymerase B) homolog (S. cerevisiae)                                                                         | BC012286  |
| 1426323_x_at | 0.2179 | Siva          | Cd27 binding protein (Hindu God of destruction)                                                                                      | AF033112  |
| 1428745_a_at | 0.2179 | 2310003L22Rik | RIKEN cDNA 2310003L22 gene                                                                                                           | AK009123  |
| 1429558_a_at | 0.2179 | C330027G06Rik | RIKEN cDNA C330027G06 gene                                                                                                           | BI104294  |
| 1434755_at   | 0.2179 | E130012P22Rik | RIKEN cDNA E130012P22 gene                                                                                                           | BB538661  |
| 1435863_at   | 0.2179 | Commd6        | Adult male corpora quadrigemina cDNA, RIKEN full-length enriched library, clone:B230114J18 product:unknown EST, full insert sequence | BE133720  |
| 1436567_a_at | 0.2179 | Ndufa7        | NADH dehydrogenase (ubiquinone) 1 alpha subcomplex, 7 (B14.5a)                                                                       | C88880    |
| 1448277_at   | 0.2179 | Pold2         | polymerase (DNA directed), delta 2, regulatory subunit                                                                               | NM_008894 |
| 1448284_a_at | 0.2179 | Ndufc1        | NADH dehydrogenase (ubiquinone) 1, subcomplex unknown, 1                                                                             | NM_025523 |
| 1450106_a_at | 0.2179 | Evl           | Ena-vasodilator stimulated phosphoprotein                                                                                            | NM_007965 |
| 1450894_a_at | 0.2179 | Ap2m1         | adaptor protein complex AP-2, mu1                                                                                                    | C76671    |
| 1451747_a_at | 0.2179 | Apg12l        | autophagy 12-like (S. cerevisiae)                                                                                                    | AK016474  |
| 1452026_a_at | 0.2179 | Pla2g12a      | phospholipase A2, group XIIA                                                                                                         | AY007382  |
| 1452619_a_at | 0.2179 | 6530406M24Rik | RIKEN cDNA 6530406M24 gene                                                                                                           | AI463408  |
| 1456315_a_at | 0.2179 | Ptpla         | protein tyrosine phosphatase-like (proline instead of catalytic arginine), member a                                                  | BB014781  |
| 1457675_at   | 0.2179 | AA409624      | RIKEN cDNA 2510002D24 gene                                                                                                           | BG063089  |
| 1418986_a_at | 0.2183 | Uxt           | ubiquitously expressed transcript                                                                                                    | NM_013840 |
| 1434642_at   | 0.2183 | Dhrs8         | dehydrogenase/reductase (SDR family) member 8                                                                                        | BB546344  |
| 1426480_at   | 0.2185 | Sbds          | Shwachman-Bodian-Diamond syndrome homolog (human)                                                                                    | BB773592  |
| 1419812_s_at | 0.2190 | D11Ert99e     | DNA segment, Chr 11, ERATO Doi 99, expressed                                                                                         | C77389    |
| 1416054_at   | 0.2191 | Rps5          | ribosomal protein S5                                                                                                                 | NM_009095 |
| 1422670_at   | 0.2192 | Rohn          | ras homolog N (RhoN)                                                                                                                 | NM_009708 |
| 1424018_at   | 0.2192 | Hint1         | histidine triad nucleotide binding protein 1                                                                                         | U60001    |
| 1416825_at   | 0.2195 | Snta1         | syntrophin, acidic 1                                                                                                                 | NM_009228 |

|              |        |               |                                                                                                                                                                                                          |           |
|--------------|--------|---------------|----------------------------------------------------------------------------------------------------------------------------------------------------------------------------------------------------------|-----------|
| 1418656_at   | 0.2195 | Lsm5          | LSM5 homolog, U6 small nuclear RNA associated ( <i>S. cerevisiae</i> )                                                                                                                                   | NM_025520 |
| 1448772_at   | 0.2195 | Ube2a         | ubiquitin-conjugating enzyme E2A, RAD6 homolog ( <i>S. cerevisiae</i> )                                                                                                                                  | BG868960  |
| 1415947_at   | 0.2199 | Creg          | cellular repressor of E1A-stimulated genes                                                                                                                                                               | BC027426  |
| 1416022_at   | 0.2199 | Fabp5         | fatty acid binding protein 5, epidermal                                                                                                                                                                  | BC002008  |
| 1435364_at   | 0.2199 |               | 4 days neonate male adipose cDNA, RIKEN full-length enriched library, clone:B430101C18 product:HYPOTHETICAL 19.9 KDA PROTEIN homolog [ <i>Homo sapiens</i> ], full insert sequence                       | BB323901  |
| 1423365_at   | 0.2205 | Cacna1g       | calcium channel, voltage-dependent, T type, alpha 1G subunit                                                                                                                                             | AW494038  |
| 1455364_a_at | 0.2205 | Rps7          | Similar to Rpl7a protein (LOC245667), mRNA                                                                                                                                                               | AI414989  |
| 1418181_at   | 0.2213 | Ptp4a3        | protein tyrosine phosphatase 4a3                                                                                                                                                                         | AK014601  |
| 1435509_x_at | 0.2213 | Cdk2ap1       | BB145140 RIKEN full-length enriched, adult female vagina <i>Mus musculus</i> cDNA clone 9930028J15 3' similar to AF011644 <i>Mus musculus</i> oral tumor suppressor homolog (Doc-1) mRNA, mRNA sequence. | BB145140  |
| 1420731_a_at | 0.2219 | Csrp2         | cysteine and glycine-rich protein 2                                                                                                                                                                      | NM_007792 |
| 1415763_a_at | 0.2221 | 2510006D16Rik | Transcribed sequence                                                                                                                                                                                     | BE853401  |
| 1434057_at   | 0.2231 |               | Similar to NADH dehydrogenase (LOC230075), mRNA                                                                                                                                                          | C78790    |
| 1425801_x_at | 0.2239 | Cotl1         | coactosin-like 1 ( <i>Dictyostelium</i> )                                                                                                                                                                | BC011068  |
| 1437510_x_at | 0.2239 | Rps17         | ribosomal protein S17                                                                                                                                                                                    | BB724547  |
| 1450891_at   | 0.2239 | Srp19         | signal recognition particle 19                                                                                                                                                                           | W08076    |
| 1426783_at   | 0.2242 | Gcn5l2        | GCN5 general control of amino acid synthesis-like 2 (yeast)                                                                                                                                              | AW212720  |
| 1416491_at   | 0.2243 | Numb1         | numb-like                                                                                                                                                                                                | NM_010950 |
| 1417183_at   | 0.2243 | Dnaja2        | DnaJ (Hsp40) homolog, subfamily A, member 2                                                                                                                                                              | C77509    |
| 1417481_at   | 0.2243 | Ramp1         | receptor (calcitonin) activity modifying protein 1                                                                                                                                                       | NM_016894 |
| 1418225_at   | 0.2243 | Orc2l         | origin recognition complex, subunit 2-like ( <i>S. cerevisiae</i> )                                                                                                                                      | BB830976  |
| 1419302_at   | 0.2243 | Heyl          | hairy/enhancer-of-split related with YRPW motif-like                                                                                                                                                     | BG695100  |
| 1423266_at   | 0.2243 | 2810405K02Rik | RIKEN cDNA 2810405K02 gene                                                                                                                                                                               | AI836168  |
| 1423299_at   | 0.2243 | Txn1l         | thioredoxin-like                                                                                                                                                                                         | BI416051  |
| 1434930_at   | 0.2243 | Tpcn1         | two pore channel 1                                                                                                                                                                                       | BI904914  |
| 1448704_s_at | 0.2243 | H47           | histocompatibility 47                                                                                                                                                                                    | NM_024439 |
| 1451714_a_at | 0.2243 | Map2k3        | mitogen activated protein kinase kinase 3                                                                                                                                                                | AI481780  |
| 1455482_at   | 0.2243 | Ap2a2         | ES cells cDNA, RIKEN full-length enriched library, clone:2410074K14 product:expressed sequence AW146353, full insert sequence                                                                            | BQ175609  |
| 1455531_at   | 0.2247 | A930031D07Rik | RIKEN cDNA A930031D07 gene                                                                                                                                                                               | AI426503  |
| 1416937_at   | 0.2249 | Gabarap       | gamma-aminobutyric acid receptor associated protein                                                                                                                                                      | BC024621  |
| 1416850_s_at | 0.2251 | D10Ert214e    | DNA segment, Chr 10, ERATO Doi 214, expressed                                                                                                                                                            | NM_134007 |
| 1425066_a_at | 0.2251 | 1110061O04Rik | RIKEN cDNA 1110061O04 gene                                                                                                                                                                               | BC018294  |
| 1452051_at   | 0.2261 | Actr3         | ARP3 actin-related protein 3 homolog (yeast)                                                                                                                                                             | BE372352  |
| 1428181_at   | 0.2263 | Etfb          | electron transferring flavoprotein, beta polypeptide                                                                                                                                                     | BI692487  |
| 1448203_at   | 0.2263 | Atp5l         | ATP synthase, H+ transporting, mitochondrial F0 complex, subunit g                                                                                                                                       | NM_013795 |
| 1422650_a_at | 0.2264 | Riok3         | RIO kinase 3 (yeast)                                                                                                                                                                                     | NM_024182 |
| 1429555_at   | 0.2264 | 1110019C08Rik | RIKEN cDNA 1110019C08 gene                                                                                                                                                                               | AA408371  |
| 1434254_at   | 0.2264 | Gna11         | guanine nucleotide binding protein, alpha 11                                                                                                                                                             | BM235739  |
| 1435638_at   | 0.2264 | 9130221H12Rik | RIKEN cDNA 9130221H12 gene                                                                                                                                                                               | BG808297  |
| 1415690_at   | 0.2265 | Mrpl27        | mitochondrial ribosomal protein L27                                                                                                                                                                      | NM_053161 |
| 1417913_at   | 0.2267 | 2810037C03Rik | RIKEN cDNA 2810037C03 gene                                                                                                                                                                               | NM_024240 |
| 1422830_s_at | 0.2267 | Drd4          | dopamine receptor 4                                                                                                                                                                                      | NM_007878 |
| 1423625_a_at | 0.2267 | 1810055D05Rik | RIKEN cDNA 1810055D05 gene                                                                                                                                                                               | AV053772  |
| 1423716_s_at | 0.2267 | Atp5d         | RIKEN cDNA 0610008F14 gene                                                                                                                                                                               | BC008273  |
| 1449590_a_at | 0.2267 | Mras          | muscle and microspikes RAS                                                                                                                                                                               | AB004879  |
| 1422998_a_at | 0.2271 | Glx2          | glutaredoxin 2 (thioltransferase)                                                                                                                                                                        | NM_023505 |
| 1423956_at   | 0.2271 | Smap1         | stromal membrane-associated protein 1                                                                                                                                                                    | BC006946  |
| 1448238_at   | 0.2271 | 2700060E02Rik | RIKEN cDNA 2700060E02 gene                                                                                                                                                                               | NM_026528 |
| 1451307_at   | 0.2271 | 1110006I11Rik | RIKEN cDNA 1110006I11 gene                                                                                                                                                                               | BC027021  |
| 1451707_s_at | 0.2271 | 1010001P06Rik | RIKEN cDNA 1010001P06 gene                                                                                                                                                                               | BC011108  |
| 1452812_at   | 0.2271 | Lphn1         | latrophilin 1                                                                                                                                                                                            | AA987131  |
| 1417081_a_at | 0.2272 | Syngn2        | synaptogyrin 2                                                                                                                                                                                           | BC004829  |
| 1423054_at   | 0.2272 | Wdr1          | WD repeat domain 1                                                                                                                                                                                       | AK004644  |
| 1415721_a_at | 0.2278 | 1200013P24Rik | RIKEN cDNA 1200013P24 gene                                                                                                                                                                               | AK004750  |

|              |        |               |                                                                                                                                                                                                                    |           |
|--------------|--------|---------------|--------------------------------------------------------------------------------------------------------------------------------------------------------------------------------------------------------------------|-----------|
| 1428823_at   | 0.2278 | 2310057G13Rik | RIKEN cDNA 2310057G13 gene                                                                                                                                                                                         | AK009957  |
| 1438717_a_at | 0.2282 | Osbpl6        | oxysterol binding protein-like 6                                                                                                                                                                                   | BG070848  |
| 1423240_at   | 0.2287 | Src           | Rous sarcoma oncogene                                                                                                                                                                                              | BG868120  |
| 1439410_x_at | 0.2294 | 3010027G13Rik | RIKEN cDNA 3010027G13 gene                                                                                                                                                                                         | BI966363  |
| 1460698_a_at | 0.2294 | 1810029G24Rik | RIKEN cDNA 1810029G24 gene                                                                                                                                                                                         | AK007641  |
| 1437908_a_at | 0.2302 | 1200007D18Rik | RIKEN cDNA 1200007D18 gene                                                                                                                                                                                         | BB095626  |
| 1419484_a_at | 0.2304 | Gbas          | glioblastoma amplified sequence                                                                                                                                                                                    | NM_008095 |
| 1426223_at   | 0.2304 | 2810439F02Rik | RIKEN cDNA 2810439F02 gene                                                                                                                                                                                         | BC020021  |
| 1428062_at   | 0.2306 | Cpa1          | carboxypeptidase A1                                                                                                                                                                                                | AK003088  |
| 1428189_at   | 0.2307 | 5730494M16Rik | RIKEN cDNA 5730494M16 gene                                                                                                                                                                                         | BQ174627  |
| 1416056_a_at | 0.2310 | Np15          | nuclear protein 15.6                                                                                                                                                                                               | BC027265  |
| 1418274_at   | 0.2310 | Nutf2         | nuclear transport factor 2                                                                                                                                                                                         | AA920031  |
| 1419003_at   | 0.2310 | Bves          | blood vessel epicardial substance                                                                                                                                                                                  | NM_024285 |
| 1423548_s_at | 0.2310 | Sdbcag84      | BB556862 RIKEN full-length enriched, 2 days pregnant adult female ovary Mus musculus cDNA clone E330025K14 3' similar to AL161963 Homo sapiens mRNA; cDNA DKFZp547A2190 (from clone DKFZp547A2190), mRNA sequence. | BB556862  |
| 1423978_at   | 0.2310 | Sbk           | SH3-binding kinase                                                                                                                                                                                                 | BC025837  |
| 1424517_at   | 0.2310 | 2700094L05Rik | RIKEN cDNA 2700094L05 gene                                                                                                                                                                                         | BC026668  |
| 1427922_at   | 0.2310 | 1110046L09Rik | RIKEN cDNA 1110046L09 gene                                                                                                                                                                                         | AW045976  |
| 1428530_x_at | 0.2310 | Rps24         | ribosomal protein S24                                                                                                                                                                                              | AV206764  |
| 1448893_at   | 0.2310 | Ncor2         | nuclear receptor co-repressor 2                                                                                                                                                                                    | NM_011424 |
| 1449024_a_at | 0.2310 | Hexa          | hexosaminidase A                                                                                                                                                                                                   | U07631    |
| 1455138_x_at | 0.2310 | Cfil1         | AV148266 Mus musculus C57BL/6J 10-11 day embryo Mus musculus cDNA clone 2810474L04, mRNA sequence.                                                                                                                 | AV148266  |
| 1456582_x_at | 0.2310 | 5230400G24Rik | BB024498 RIKEN full-length enriched, adult male pituitary gland Mus musculus cDNA clone 5330422C22 3', mRNA sequence.                                                                                              | BB024498  |
| 1428675_at   | 0.2311 | 1110049F12Rik | RIKEN cDNA 1110049F12 gene                                                                                                                                                                                         | AK004208  |
| 1448266_at   | 0.2311 | Edf1          | endothelial differentiation-related factor 1                                                                                                                                                                       | AB030185  |
| 1417240_at   | 0.2312 | Zyx           | zyxin                                                                                                                                                                                                              | NM_011777 |
| 1424133_at   | 0.2312 | 6530411B15Rik | RIKEN cDNA 6530411B15 gene                                                                                                                                                                                         | BC011208  |
| 1423181_s_at | 0.2313 | Clns1a        | chloride channel, nucleotide-sensitive, 1A                                                                                                                                                                         | AK011789  |
| 1438058_s_at | 0.2315 | Ptov1         | prostate tumor over expressed gene 1                                                                                                                                                                               | BG073526  |
| 1418743_a_at | 0.2317 | Tesc          | tescalcin                                                                                                                                                                                                          | NM_021344 |
| 1425758_a_at | 0.2323 | Impg1         | interphotoreceptor matrix proteoglycan 1                                                                                                                                                                           | AF266478  |
| 1428118_at   | 0.2323 | Lrrn6a        | RIKEN cDNA 4930471K13 gene                                                                                                                                                                                         | BB078751  |
| 1434646_s_at | 0.2328 | Sap18         | Sin3-associated polypeptide 18                                                                                                                                                                                     | AV023865  |
| 1431744_a_at | 0.2332 | Smap1         | Mus musculus adult male testis cDNA, RIKEN full-length enriched library, clone:4921514B13 product:STROMAL MEMBRANE-ASSOCIATED PROTEIN SMAP1B homolog [Homo sapiens], full insert sequence.                         | AK014888  |
| 1423221_at   | 0.2336 | Tubb4         | tubulin, beta 4                                                                                                                                                                                                    | AK013717  |
| 1424212_at   | 0.2336 | 9430023L20Rik | RIKEN cDNA 9430023L20 gene                                                                                                                                                                                         | BC016463  |
| 1416104_at   | 0.2338 | Mpdu1         | mannose-P-dolichol utilization defect 1                                                                                                                                                                            | NM_011900 |
| 1416566_at   | 0.2345 | Strap         | serine/threonine kinase receptor associated protein                                                                                                                                                                | NM_011499 |
| 1417192_at   | 0.2345 | D16Wsu109e    | DNA segment, Chr 16, Wayne State University 109, expressed                                                                                                                                                         | NM_138599 |
| 1417418_s_at | 0.2345 | Cox6a1        | cytochrome c oxidase, subunit VI a, polypeptide 1                                                                                                                                                                  | NM_007748 |
| 1420679_a_at | 0.2345 | Aig1          | androgen-induced 1                                                                                                                                                                                                 | NM_025446 |
| 1424300_at   | 0.2345 | Gemin6        | gem (nuclear organelle) associated protein 6                                                                                                                                                                       | BC025157  |
| 1425780_a_at | 0.2345 | 0610041E09Rik | RIKEN cDNA 0610041E09 gene                                                                                                                                                                                         | BC024352  |
| 1425891_a_at | 0.2345 | Grtp1         | GH regulated TBC protein 1                                                                                                                                                                                         | AF329833  |
| 1428554_a_at | 0.2345 | 1810035L17Rik | 10 days neonate skin cDNA, RIKEN full-length enriched library, clone:4732452F11 product:weakly similar to DC50 (DC23) [Homo sapiens], full insert sequence                                                         | BQ126239  |
| 1428843_at   | 0.2345 | 1810015H18Rik | RIKEN cDNA 1810015H18 gene                                                                                                                                                                                         | AK009364  |
| 1429252_at   | 0.2345 | 0610010K14Rik | RIKEN cDNA 0610010K14 gene                                                                                                                                                                                         | AK002491  |

|              |        |               |                                                                                                                                                                                                                                                                                                                                                                          |           |
|--------------|--------|---------------|--------------------------------------------------------------------------------------------------------------------------------------------------------------------------------------------------------------------------------------------------------------------------------------------------------------------------------------------------------------------------|-----------|
| 1431506_s_at | 0.2345 | Ppih          | unnamed protein product; U-SNRNP-ASSOCIATED CYCLOPHILIN (EC 5.2.1.8) homolog [Homo sapiens] (SPTR O43447, evidence: FASTY, 100%ID, 100%length, match=531) putative; Mus musculus adult male small intestine cDNA, RIKEN full-length enriched library, clone:2010111B15 product:U-SNRNP-ASSOCIATED CYCLOPHILIN (EC 5.2.1.8) homolog [Homo sapiens], full insert sequence. | AK008394  |
| 1431665_a_at | 0.2345 | Timm8b        | unnamed protein product; putative translocase of inner mitochondrial membrane 8 homolog b (yeast) (MGD MGI:1353424); Mus musculus 18-day embryo whole body cDNA, RIKEN full-length enriched library, clone:1110046L21 product:translocase of inner mitochondrial membrane 8 homolog b (yeast), full insert sequence.                                                     | AK004190  |
| 1434971_x_at | 0.2345 | Mrpl15        | AV216669 RIKEN full-length enriched, ES cells Mus musculus cDNA clone 2410165L09 3', mRNA sequence.                                                                                                                                                                                                                                                                      | AV216669  |
| 1448368_at   | 0.2345 | Dctn6         | dynactin 6                                                                                                                                                                                                                                                                                                                                                               | NM_011722 |
| 1451162_at   | 0.2345 | Hsbp1         | unnamed protein product; SIMILAR TO HEAT SHOCK FACTOR BINDING PROTEIN 1 [Mus musculus] (SPTR Q9CQZ1, evidence: FASTY, 100%ID, 100%length, match=228) putative; Mus musculus 13 days embryo liver cDNA, RIKEN full-length enriched library, clone:2510008P16 product:SIMILAR TO HEAT SHOCK FACTOR BINDING PROTEIN 1 [Mus musculus], full insert sequence.                 | AK010939  |
| 1451731_at   | 0.2345 | Abca3         | ATP-binding cassette, sub-family A (ABC1), member 3                                                                                                                                                                                                                                                                                                                      | AK007703  |
| 1452721_a_at | 0.2345 | 2900091E11Rik | RIKEN cDNA 2900091E11 gene                                                                                                                                                                                                                                                                                                                                               | BM210204  |
| 1454688_x_at | 0.2345 | 1110014C03Rik | RIKEN cDNA 1110014C03 gene                                                                                                                                                                                                                                                                                                                                               | AV103299  |
| 1460308_a_at | 0.2345 | Ict1          | immature colon carcinoma transcript 1                                                                                                                                                                                                                                                                                                                                    | NM_026729 |
| 1418567_a_at | 0.2347 | Srp14         | signal recognition particle 14                                                                                                                                                                                                                                                                                                                                           | NM_009273 |
| 1449119_at   | 0.2347 | Arih2         | ariadne homolog 2 (Drosophila)                                                                                                                                                                                                                                                                                                                                           | NM_011790 |
| 1451572_a_at | 0.2349 | 5230400G24Rik | RIKEN cDNA 5230400G24 gene                                                                                                                                                                                                                                                                                                                                               | BC016597  |
| 1434214_at   | 0.2351 | 0910001L09Rik | RIKEN cDNA 0910001L09 gene                                                                                                                                                                                                                                                                                                                                               | BI525016  |
| 1415873_a_at | 0.2363 | Actr1a        | ARP1 actin-related protein 1 homolog A (yeast)                                                                                                                                                                                                                                                                                                                           | NM_016860 |
| 1417502_at   | 0.2363 | Tm4sf2        | transmembrane 4 superfamily member 2                                                                                                                                                                                                                                                                                                                                     | AF052492  |
| 1424122_s_at | 0.2363 | Commd1        | COMM domain containing 1                                                                                                                                                                                                                                                                                                                                                 | AB076722  |
| 1424211_at   | 0.2363 | 5730438N18Rik | RIKEN cDNA 5730438N18 gene                                                                                                                                                                                                                                                                                                                                               | BC011293  |
| 1452580_a_at | 0.2363 | BC028768      | cDNA sequence BC028768                                                                                                                                                                                                                                                                                                                                                   | BI692686  |
| 1454921_at   | 0.2363 |               | Hypothetical LOC228715 (LOC228715), mRNA                                                                                                                                                                                                                                                                                                                                 | AV111575  |
| 1456373_x_at | 0.2363 |               | ribosomal protein S20                                                                                                                                                                                                                                                                                                                                                    | AV046829  |
| 1460008_x_at | 0.2363 | Rpl31         | ribosomal protein L31                                                                                                                                                                                                                                                                                                                                                    | AV109882  |

<sup>a</sup> Six probes included by Affymetrix as controls were removed from this list

**TABLE S3. Bioweight and SAM<sup>a</sup> common genes**

| Probe        | Bioweight | Gene          | Description                                                                                                                                                                                       |
|--------------|-----------|---------------|---------------------------------------------------------------------------------------------------------------------------------------------------------------------------------------------------|
| 1452790_x_at | 4.068     | Ndufa3        | NADH dehydrogenase (ubiquinone) 1 alpha subcomplex, 3                                                                                                                                             |
| 1422586_at   | 3.041     | Ecel1         | endothelin converting enzyme-like 1                                                                                                                                                               |
| 1448685_at   | 2.975     | 2900010M23Rik | RIKEN cDNA 2900010M23 gene                                                                                                                                                                        |
| 1418300_a_at | 2.861     | Mknk2         | MAP kinase-interacting serine/threonine kinase 2                                                                                                                                                  |
| 1456109_a_at | 2.860     | Mrps15        | mitochondrial ribosomal protein S15                                                                                                                                                               |
| 1450795_at   | 2.837     | Lhb           | luteinizing hormone beta                                                                                                                                                                          |
| 1416134_at   | 2.792     | Aplp1         | amyloid beta (A4) precursor-like protein 1                                                                                                                                                        |
| 1418255_s_at | 2.695     | Srf           | serum response factor                                                                                                                                                                             |
| 1437164_x_at | 2.657     | Atp5o         | ATP synthase, H <sup>+</sup> transporting, mitochondrial F1 complex, O subunit                                                                                                                    |
| 1428464_at   | 2.585     | Ndufa3        | NADH dehydrogenase (ubiquinone) 1 alpha subcomplex, 3                                                                                                                                             |
| 1448830_at   | 2.578     | Dusp1         | dual specificity phosphatase 1                                                                                                                                                                    |
| 1427985_at   | 2.541     | 9630042H07Rik | RIKEN cDNA 9630042H07 gene                                                                                                                                                                        |
| 1436064_x_at | 2.425     | Rps24         | ribosomal protein S24                                                                                                                                                                             |
| 1455950_x_at | 2.404     | Rpl35         | RIKEN cDNA 1700123D08 gene                                                                                                                                                                        |
| 1422532_at   | 2.396     | Xpc           | xeroderma pigmentosum, complementation group C                                                                                                                                                    |
| 1460711_at   | 2.388     | 9930116P15Rik | ES cells cDNA, RIKEN full-length enriched library, clone:C330022M23 product:unclassifiable, full insert sequence                                                                                  |
| 1450008_a_at | 2.365     | Catnb         | catenin beta                                                                                                                                                                                      |
| 1451307_at   | 2.355     | 1110006111Rik | RIKEN cDNA 1110006111 gene                                                                                                                                                                        |
| 1437354_at   | 2.316     |               | 0 day neonate cerebellum cDNA, RIKEN full-length enriched library, clone:C230091D08 product:unclassifiable, full insert sequence                                                                  |
| 1437621_x_at | 2.308     |               | AV216768 RIKEN full-length enriched, ES cells Mus musculus cDNA clone 2410167D16 3' similar to L21027 Mus musculus A10 mRNA, mRNA sequence.                                                       |
| 1423948_at   | 2.242     | Bag2          | Bcl2-associated athanogene 2                                                                                                                                                                      |
| 1433603_at   | 2.210     | BC059730      | CDNA clone IMAGE:6772417, with apparent retained intron                                                                                                                                           |
| 1422614_s_at | 2.192     | Bloc1s1       | GCN5 general control of amino acid synthesis-like 1 (yeast)                                                                                                                                       |
| 1416367_at   | 2.175     | 1110001J03Rik | RIKEN cDNA 1110001J03 gene                                                                                                                                                                        |
| 1417657_s_at | 2.121     | Zrf2          | zuotin related factor 2                                                                                                                                                                           |
| 1455106_a_at | 2.120     | Ckb           | creatine kinase, brain                                                                                                                                                                            |
| 1416584_at   | 2.109     | Man2b2        | mannosidase 2, alpha B2                                                                                                                                                                           |
| 1416494_at   | 2.091     | Ndufs5        | NADH dehydrogenase (ubiquinone) Fe-S protein 5                                                                                                                                                    |
| 1424766_at   | 2.044     | BC004701      | cDNA sequence BC004701                                                                                                                                                                            |
| 1418256_at   | 2.043     | Srf           | serum response factor                                                                                                                                                                             |
| 1427294_a_at | 2.036     | 1810073N04Rik | RIKEN cDNA 1810073N04 gene                                                                                                                                                                        |
| 1417348_at   | 2.034     | 2310039H08Rik | male enhanced antigen 1                                                                                                                                                                           |
| 1418910_at   | 2.011     | Bmp7          | bone morphogenetic protein 7                                                                                                                                                                      |
| 1452367_at   | 2.008     | Coro2a        | tripartite motif-containing 14                                                                                                                                                                    |
| 1454674_at   | 1.994     | Fez1          | fasciculation and elongation protein zeta 1 (zygin I)                                                                                                                                             |
| 1429144_at   | 1.994     | 2310032D16Rik | RIKEN cDNA 2310032D16 gene                                                                                                                                                                        |
| 1428494_a_at | 1.985     | Polr2i        | polymerase (RNA) II (DNA directed) polypeptide I                                                                                                                                                  |
| 1419529_at   | 1.976     | Il23a         | interleukin 23, alpha subunit p19                                                                                                                                                                 |
| 1428869_at   | 1.961     | Nolc1         | nucleolar and coiled-body phosphoprotein 1                                                                                                                                                        |
| 1420922_at   | 1.945     | Usp9x         | Similar to ubiquitin specific protease 9, X-linked isoform 2; Drosophila fat facets related, X-linked; ubiquitin specific protease 9, X chromosome (fat facets-like Drosophila) (LOC240170), mRNA |
| 1419292_at   | 1.938     | 9530081K03Rik | RIKEN cDNA 9530081K03 gene                                                                                                                                                                        |
| 1434392_at   | 1.930     | Usp34         | U2af1-rs1 region 2                                                                                                                                                                                |
| 1424871_s_at | 1.930     | 1500031H01Rik | cDNA sequence BC013706                                                                                                                                                                            |
| 1429850_x_at | 1.921     | 2010004B12Rik | RIKEN cDNA 2010004B12 gene                                                                                                                                                                        |

|              |       |               |                                                                                                                                                                                                      |
|--------------|-------|---------------|------------------------------------------------------------------------------------------------------------------------------------------------------------------------------------------------------|
| 1416713_at   | 1.917 | 2700055K07Rik | RIKEN cDNA 2700055K07 gene                                                                                                                                                                           |
| 1434646_s_at | 1.916 | Sap18         | Sin3-associated polypeptide 18                                                                                                                                                                       |
| 1423857_at   | 1.914 | Mrpl30        | mitochondrial ribosomal protein L30                                                                                                                                                                  |
| 1418448_at   | 1.914 | Rras          | Harvey rat sarcoma oncogene, subgroup R                                                                                                                                                              |
| 1424018_at   | 1.910 | Hint1         | histidine triad nucleotide binding protein 1                                                                                                                                                         |
| 1437450_x_at | 1.877 | 2700060E02Rik | RIKEN cDNA 2700060E02 gene                                                                                                                                                                           |
| 1425248_a_at | 1.875 | Tyro3         | TYRO3 protein tyrosine kinase 3                                                                                                                                                                      |
| 1424002_at   | 1.874 | Pdcl3         | phosducin-like 3                                                                                                                                                                                     |
| 1450466_at   | 1.867 |               | Adult male corpora quadrigemina cDNA, RIKEN full-length enriched library, clone:B230310J22 product:unclassifiable, full insert sequence                                                              |
| 1448917_at   | 1.865 | Thrap6        | thyroid hormone receptor associated protein 6                                                                                                                                                        |
| 1423676_at   | 1.861 | Atp5h         | ATP synthase, H <sup>+</sup> transporting, mitochondrial F0 complex, subunit d                                                                                                                       |
| 1416495_s_at | 1.849 | Ndufs5        | NADH dehydrogenase (ubiquinone) Fe-S protein 5                                                                                                                                                       |
| 1428076_s_at | 1.843 | Ndufb4        | NADH dehydrogenase (ubiquinone) 1 beta subcomplex 4                                                                                                                                                  |
| 1420368_at   | 1.830 | Denr          | Mus musculus ES cells cDNA, RIKEN full-length enriched library, clone:2410004J11 product:DENSITY-REGULATED PROTEIN (DRP), full insert sequence.                                                      |
| 1418709_at   | 1.785 | Cox7a1        | cytochrome c oxidase, subunit VIIa 1                                                                                                                                                                 |
| 1418273_a_at | 1.770 | Rpl30         | ribosomal protein L30                                                                                                                                                                                |
| 1416859_at   | 1.766 | Fkbp3         | FK506 binding protein 3                                                                                                                                                                              |
| 1424172_at   | 1.763 | Hagh          | hydroxyacyl glutathione hydrolase                                                                                                                                                                    |
| 1437133_x_at | 1.751 | Akr1b3        | 2 days pregnant adult female oviduct cDNA, RIKEN full-length enriched library, clone:E230024H01 product:unknown EST, full insert sequence                                                            |
| 1424391_at   | 1.750 | Nrd1          | nardilysin, N-arginine dibasic convertase, NRD convertase 1                                                                                                                                          |
| 1434396_a_at | 1.739 | Myl6          | myosin light chain, alkali, nonmuscle                                                                                                                                                                |
| 1435755_at   | 1.734 | 1110001A16Rik | RIKEN cDNA 1110001A16 gene                                                                                                                                                                           |
| 1448794_s_at | 1.730 | Zrf2          | zuotin related factor 2                                                                                                                                                                              |
| 1460724_at   | 1.729 | Ap2a1         | adaptor protein complex AP-2, alpha 1 subunit                                                                                                                                                        |
| 1416337_at   | 1.719 | Uqcrb         | ubiquinol-cytochrome c reductase binding protein                                                                                                                                                     |
| 1422480_at   | 1.710 | Snx3          | sorting nexin 3                                                                                                                                                                                      |
| 1454686_at   | 1.703 | 6430706D22Rik | RIKEN cDNA 6430706D22 gene                                                                                                                                                                           |
| 1460581_a_at | 1.701 | Rpl13         | Transcribed sequence with strong similarity to protein ref:NP_150254.1 (H.sapiens) ribosomal protein L13; 60S ribosomal protein L13; breast basic conserved protein 1 [Homo sapiens]                 |
| 1423090_x_at | 1.698 | Sec61g        | Transcribed sequence with strong similarity to protein sp:P38384 (H.sapiens) S61G_HUMAN Protein transport protein SEC61 gamma subunit                                                                |
| 1421260_a_at | 1.697 | Srm           | spermidine synthase                                                                                                                                                                                  |
| 1417155_at   | 1.691 | Nmyc1         | neuroblastoma myc-related oncogene 1                                                                                                                                                                 |
| 1434053_x_at | 1.681 | Atp5k         | ATP synthase, H <sup>+</sup> transporting, mitochondrial F1F0 complex, subunit e                                                                                                                     |
| 1427490_at   | 1.679 | Abcb7         | ATP-binding cassette, sub-family B (MDR/TAP), member 7                                                                                                                                               |
| 1425300_at   | 1.670 | BC021917      | cDNA sequence BC021917                                                                                                                                                                               |
| 1420811_a_at | 1.664 | Catnb         | catenin beta                                                                                                                                                                                         |
| 1439389_s_at | 1.659 | Myadm         | BB500055 RIKEN full-length enriched, 0 day neonate kidney Mus musculus cDNA clone D630024J02 3' similar to AJ001616 Mus musculus mRNA for myeloid associated differentiation protein, mRNA sequence. |
| 1417394_at   | 1.658 | Klf4          | Kruppel-like factor 4 (gut)                                                                                                                                                                          |
| 1438563_s_at | 1.650 | Mrps24        | AV069725 Mus musculus small intestine C57BL/6J adult Mus musculus cDNA clone 2010312F15, mRNA sequence.                                                                                              |
| 1449029_at   | 1.648 | Mknk2         | MAP kinase-interacting serine/threonine kinase 2                                                                                                                                                     |
| 1416098_at   | 1.648 | Syngn3        | synaptogyrin 3                                                                                                                                                                                       |
| 1426653_at   | 1.645 | Mcm3          | minichromosome maintenance deficient 3 (S. cerevisiae)                                                                                                                                               |
| 1448440_x_at | 1.631 | D17Wsu104e    | interleukin 25                                                                                                                                                                                       |
| 1427943_at   | 1.629 | Acyp2         | acylphosphatase 2, muscle type                                                                                                                                                                       |

|              |       |               |                                                                                                                                  |
|--------------|-------|---------------|----------------------------------------------------------------------------------------------------------------------------------|
| 1448319_at   | 1.628 | Akr1b3        | aldo-keto reductase family 1, member B3 (aldose reductase)                                                                       |
| 1422608_at   | 1.625 | Arpp19        | cAMP-regulated phosphoprotein 19                                                                                                 |
| 1452519_a_at | 1.621 | Zfp36         | unnamed protein product; TIS11 (AA 1 - 183); Mouse TPA-induced TIS11 mRNA.                                                       |
| 1452184_at   | 1.620 | Ndubf9        | NADH dehydrogenase (ubiquinone) 1 beta subcomplex, 9                                                                             |
| 1451959_a_at | 1.617 | Vegfa         | vascular endothelial growth factor A                                                                                             |
| 1456128_at   | 1.616 | Atp5g2        | ATP synthase, H+ transporting, mitochondrial F0 complex, subunit c (subunit 9), isoform 2                                        |
| 1456691_s_at | 1.614 | Srd5a2l       | BB825787 RIKEN full-length enriched, mammary gland RCB-0526 Jyg-MC(A) cDNA Mus musculus cDNA clone G830039K08 3', mRNA sequence. |
| 1418226_at   | 1.607 | Orc2l         | origin recognition complex, subunit 2-like (S. cerevisiae)                                                                       |
| 1434442_at   | 1.607 | D5Erttd593e   | DNA segment, Chr 5, ERATO Doi 593, expressed                                                                                     |
| 1449011_at   | 1.607 | Slc12a7       | solute carrier family 12, member 7                                                                                               |
| 1423610_at   | 1.605 | Metap2        | Adult retina cDNA, RIKEN full-length enriched library, clone:A930035J23 product:unknown EST, full insert sequence                |
| 1416673_at   | 1.600 | Bace2         | beta-site APP-cleaving enzyme 2                                                                                                  |
| 1416765_s_at | 1.598 | Magmas        | mitochondria-associated protein involved in granulocyte-macrophage colony-stimulating factor signal transduction                 |
| 1417432_a_at | 1.596 | Gnb1          | guanine nucleotide binding protein, beta 1                                                                                       |
| 1433451_at   | 1.592 | Cdk5r         | cyclin-dependent kinase 5, regulatory subunit (p35)                                                                              |
| 1418942_at   | 1.591 | Ccdc2         | coiled-coil domain containing 2                                                                                                  |
| 1435041_at   | 1.582 | Myl6          | myosin light chain, alkali, nonmuscle                                                                                            |
| 1426659_a_at | 1.571 | BC029892      | Similar to 60S ribosomal protein L23a (LOC268449), mRNA                                                                          |
| 1452357_at   | 1.569 | Sept5         | septin 5                                                                                                                         |
| 1456471_x_at | 1.569 | Phgdh         | Transcribed sequence with strong similarity to protein sp:Q61753 (M.musculus) SERA_MOUSE D-3-phosphoglycerate dehydrogenase      |
| 1448483_a_at | 1.569 | Ndubf2        | NADH dehydrogenase (ubiquinone) 1 beta subcomplex, 2                                                                             |
| 1453362_x_at | 1.567 | Rps24         | ribosomal protein S24                                                                                                            |
| 1448050_s_at | 1.566 | Map4k4        | mitogen-activated protein kinase kinase kinase kinase 4                                                                          |
| 1422967_a_at | 1.564 | Tfrc          | transferrin receptor                                                                                                             |
| 1422507_at   | 1.552 | Cstb          | cystatin B                                                                                                                       |
| 1427939_s_at | 1.551 | Mycbp         | c-myc binding protein                                                                                                            |
| 1436510_a_at | 1.547 | Lrrfp2        | leucine rich repeat (in FLII) interacting protein 2                                                                              |
| 1427913_at   | 1.546 | Rwdd1         | RWD domain containing 1                                                                                                          |
| 1417389_at   | 1.545 | Gpc1          | glypican 1                                                                                                                       |
| 1448353_x_at | 1.534 | Rpn1          | ribophorin I                                                                                                                     |
| 1425231_a_at | 1.526 | Zfp46         | zinc finger protein 46                                                                                                           |
| 1417380_at   | 1.526 | Iqgap1        | IQ motif containing GTPase activating protein 1                                                                                  |
| 1452143_at   | 1.524 | Spnb2         | spectrin beta 2                                                                                                                  |
| 1426657_s_at | 1.522 | Phgdh         | 3-phosphoglycerate dehydrogenase                                                                                                 |
| 1426964_at   | 1.521 | 3110003A17Rik | RIKEN cDNA 3110003A17 gene                                                                                                       |
| 1415761_at   | 1.521 | Mrpl52        | mitochondrial ribosomal protein L52                                                                                              |
| 1435857_s_at | 1.520 | Aplp1         | amyloid beta (A4) precursor-like protein 1                                                                                       |
| 1416850_s_at | 1.519 | D10Erttd214e  | DNA segment, Chr 10, ERATO Doi 214, expressed                                                                                    |
| 1448439_at   | 1.515 | D17Wsu104e    | interleukin 25                                                                                                                   |
| 1438001_x_at | 1.510 | Dp1           | deleted in polyposis 1                                                                                                           |
| 1428286_at   | 1.508 | 2900097C17Rik | 13 days embryo forelimb cDNA, RIKEN full-length enriched library, clone:5930433F13 product:unknown EST, full insert sequence     |
| 1425384_a_at | 1.507 | Ube4a         | ubiquitination factor E4A, UFD2 homolog (S. cerevisiae)                                                                          |
| 1428340_s_at | 1.503 | 1110012E06Rik | RIKEN cDNA 1110012E06 gene                                                                                                       |
| 1449482_at   | 1.498 | Hist3h2ba     | histone 3, H2ba                                                                                                                  |
| 1448784_at   | 1.496 | Taf10         | TAF10 RNA polymerase II, TATA box binding protein (TBP)-associated factor                                                        |
| 1418327_at   | 1.495 | 1110058L19Rik | RIKEN cDNA 1110058L19 gene                                                                                                       |

|              |       |               |                                                                                                                      |
|--------------|-------|---------------|----------------------------------------------------------------------------------------------------------------------|
| 1449324_at   | 1.489 | Ero1l         | Transcribed sequences                                                                                                |
| 1424110_a_at | 1.486 | Nme1          | expressed in non-metastatic cells 1, protein                                                                         |
| 1434561_at   | 1.484 | Asxl1         | additional sex combs like 1 (Drosophila)                                                                             |
| 1416834_x_at | 1.469 | Ndufb2        | NADH dehydrogenase (ubiquinone) 1 beta subcomplex, 2                                                                 |
| 1428679_s_at | 1.461 | 0610010K14Rik | RIKEN cDNA 0610010K14 gene                                                                                           |
| 1420971_at   | 1.460 | Ubr1          | ubiquitin protein ligase E3 component n-recognin 1                                                                   |
| 1448623_at   | 1.456 | 2310075C12Rik | RIKEN cDNA 2310075C12 gene                                                                                           |
| 1423804_a_at | 1.455 | Idi1          | isopentenyl-diphosphate delta isomerase                                                                              |
| 1428848_a_at | 1.450 | Macf1         | microtubule-actin crosslinking factor 1                                                                              |
| 1431771_a_at | 1.446 | Irak1bp1      | interleukin-1 receptor-associated kinase 1 binding protein 1                                                         |
| 1424121_at   | 1.444 | Commd1        | COMM domain containing 1                                                                                             |
| 1421519_a_at | 1.435 | Zfp120        | zinc finger protein 120                                                                                              |
| 1437013_x_at | 1.433 | Atp6v0b       | AV339131 RIKEN full-length enriched, adult male olfactory bulb Mus musculus cDNA clone 6430502C13 3', mRNA sequence. |
| 1437908_a_at | 1.432 | 1200007D18Rik | RIKEN cDNA 1200007D18 gene                                                                                           |
| 1423916_s_at | 1.429 | Mlf2          | myeloid leukemia factor 2                                                                                            |
| 1422718_at   | 1.427 | Ap3s2         | adaptor-related protein complex 3, sigma 2 subunit                                                                   |
| 1451259_at   | 1.424 | Smfn          | small fragment nuclease                                                                                              |
| 1448595_a_at | 1.416 | Rex3          | reduced expression 3                                                                                                 |
| 1422432_at   | 1.412 | Dbi           | diazepam binding inhibitor                                                                                           |
| 1448331_at   | 1.411 | Ndufb7        | calmegin                                                                                                             |
| 1424396_a_at | 1.407 | Asrgl1        | asparaginase like 1                                                                                                  |
| 1427938_at   | 1.407 | Mycbp         | c-myc binding protein                                                                                                |
| 1419398_a_at | 1.406 | Dp1           | deleted in polyposis 1                                                                                               |
| 1415899_at   | 1.405 | Junb          | Jun-B oncogene                                                                                                       |
| 1451109_a_at | 1.404 | Nedd4         | neural precursor cell expressed, developmentally down-regulated gene 4                                               |
| 1419647_a_at | 1.403 | Ier3          | immediate early response 3                                                                                           |
| 1460670_at   | 1.399 | RioK3         | RIO kinase 3 (yeast)                                                                                                 |
| 1418577_at   | 1.396 | Trim8         | tripartite motif protein 8                                                                                           |
| 1449080_at   | 1.394 | Hdac2         | histone deacetylase 2                                                                                                |
| 1416129_at   | 1.391 | 1300002F13Rik | RIKEN cDNA 1300002F13 gene                                                                                           |
| 1421333_a_at | 1.390 | Mynn          | myoneurin                                                                                                            |
| 1425188_s_at | 1.387 | Sel1h         | Sel1 (suppressor of lin-12) 1 homolog (C. elegans)                                                                   |
| 1428075_at   | 1.386 | Ndufb4        | NADH dehydrogenase (ubiquinone) 1 beta subcomplex 4                                                                  |
| 1451045_at   | 1.379 | Syt13         | synaptotagmin 13                                                                                                     |
| 1417652_a_at | 1.376 | Tbca          | tubulin cofactor a                                                                                                   |
| 1460701_a_at | 1.371 | Mrpl52        | mitochondrial ribosomal protein L52                                                                                  |
| 1434872_x_at | 1.369 | Rpl37         | AV170241 Mus musculus head C57BL/6J 13-day embryo Mus musculus cDNA clone 3110094P05, mRNA sequence.                 |
| 1456244_x_at | 1.359 | Txnl2         | thioredoxin-like 2                                                                                                   |
| 1418896_a_at | 1.359 | Rpn2          | ribophorin II                                                                                                        |
| 1455749_x_at | 1.359 | Ndufa7        | NADH dehydrogenase (ubiquinone) 1 alpha subcomplex, 7 (B14.5a)                                                       |
| 1437907_a_at | 1.352 | Tbca          | tubulin cofactor a                                                                                                   |
| 1430533_a_at | 1.351 | Catnb         | catenin beta                                                                                                         |
| 1449294_at   | 1.348 | Mrps15        | mitochondrial ribosomal protein S15                                                                                  |
| 1452646_at   | 1.347 | 1110029F20Rik | RIKEN cDNA 1110029F20 gene                                                                                           |
| 1426660_x_at | 1.345 | BC029892      | Similar to 60S ribosomal protein L23a (LOC268449), mRNA                                                              |
| 1439415_x_at | 1.345 | Rps21         | ribosomal protein S21                                                                                                |
| 1426297_at   | 1.344 | Tcfe2a        | transcription factor E2a                                                                                             |
| 1450638_at   | 1.342 | Pdcd5         | programmed cell death 5                                                                                              |
| 1426744_at   | 1.339 | Srebf2        | sterol regulatory element binding factor 2                                                                           |



|              |       |               |                                                                                                                                                                                  |
|--------------|-------|---------------|----------------------------------------------------------------------------------------------------------------------------------------------------------------------------------|
| 1416057_at   | 1.335 | Np15          | nuclear protein 15.6                                                                                                                                                             |
| 1422615_at   | 1.315 | Map4k4        | mitogen-activated protein kinase kinase kinase kinase 4                                                                                                                          |
| 1449256_a_at | 1.313 | Rab11a        | RAB11a, member RAS oncogene family                                                                                                                                               |
| 1422778_at   | 1.312 | Taf9          | TAF9 RNA polymerase II, TATA box binding protein (TBP)-associated factor                                                                                                         |
| 1424684_at   | 1.310 | Rab5c         | RAB5C, member RAS oncogene family                                                                                                                                                |
| 1428257_s_at | 1.305 | Dncl2a        | dynein, cytoplasmic, light chain 2A                                                                                                                                              |
| 1456615_a_at | 1.305 | Falz          | vx16a10.r1 Soares_thymus_2NbMT Mus musculus cDNA clone IMAGE:1264602 5', mRNA sequence.                                                                                          |
| 1448127_at   | 1.304 | Rrm1          | ribonucleotide reductase M1                                                                                                                                                      |
| 1417103_at   | 1.298 | Ddt           | D-dopachrome tautomerase                                                                                                                                                         |
| 1416910_at   | 1.296 | Dnajd1        | DnaJ (Hsp40) homolog, subfamily D, member 1                                                                                                                                      |
| 1415919_at   | 1.295 | Npdc1         | neural proliferation, differentiation and control gene 1                                                                                                                         |
| 1417510_at   | 1.293 | Vps4a         | vacuolar protein sorting 4a (yeast)                                                                                                                                              |
| 1426209_at   | 1.291 | Strn4         | striatin, calmodulin binding protein 4                                                                                                                                           |
| 1435431_at   | 1.289 | 2310047M15Rik | RIKEN cDNA 2310047M15 gene                                                                                                                                                       |
| 1455372_at   | 1.288 | Cpeb3         | cytoplasmic polyadenylation element binding protein 3                                                                                                                            |
| 1448427_at   | 1.283 | Ndufa6        | NADH dehydrogenase (ubiquinone) 1 alpha subcomplex, 6 (B14)                                                                                                                      |
| 1425721_at   | 1.283 | Phip          | pleckstrin homology domain interacting protein                                                                                                                                   |
| 1419356_at   | 1.282 | Klf7          | Kruppel-like factor 7 (ubiquitous)                                                                                                                                               |
| 1425702_a_at | 1.280 | Enpp5         | ectonucleotide pyrophosphatase/phosphodiesterase 5                                                                                                                               |
| 1417399_at   | 1.280 | Gas6          | growth arrest specific 6                                                                                                                                                         |
| 1423086_at   | 1.275 | Npc1          | RIKEN cDNA 2400010D15 gene                                                                                                                                                       |
| 1456663_x_at | 1.273 | 2410018G23Rik | BB718785 RIKEN full-length enriched, adult male liver tumor Mus musculus cDNA clone C730019F01 3', mRNA sequence.                                                                |
| 1449429_at   | 1.273 | Fkbp1b        | FK506 binding protein 1b                                                                                                                                                         |
| 1448566_at   | 1.273 | Slc40a1       | solute carrier family 40 (iron-regulated transporter), member 1                                                                                                                  |
| 1429708_at   | 1.271 | Ndufa11       | NADH dehydrogenase (ubiquinone) 1 alpha subcomplex                                                                                                                               |
| 1420842_at   | 1.269 | Ptprf         | protein tyrosine phosphatase, receptor type, F                                                                                                                                   |
| 1425206_a_at | 1.269 | 0610009M14Rik | BB224620 RIKEN full-length enriched, adult male aorta and vein Mus musculus cDNA clone A530087G20 3', mRNA sequence.                                                             |
| 1418019_at   | 1.267 | Cpd           | carboxypeptidase D                                                                                                                                                               |
| 1435517_x_at | 1.266 | Ralb          | BB465250 RIKEN full-length enriched, 12 days embryo spinal ganglion Mus musculus cDNA clone D130097N13 3' similar to L19699 Rat GTP-binding protein (ral B) mRNA, mRNA sequence. |
| 1420878_a_at | 1.264 | Ywhab         | tyrosine 3-monooxygenase/tryptophan 5-monooxygenase activation protein, beta polypeptide                                                                                         |
| 1448320_at   | 1.256 | Stim1         | stromal interaction molecule 1                                                                                                                                                   |
| 1424285_s_at | 1.254 | Arl6ip4       | ADP-ribosylation factor-like 6 interacting protein 4                                                                                                                             |
| 1435873_a_at | 1.253 | Rpl13a        | Transcribed sequence with strong similarity to protein pir:S29539 (H.sapiens) S29539 ribosomal protein L13a, cytosolic - human                                                   |
| 1416816_at   | 1.253 | Nek7          | NIMA (never in mitosis gene a)-related expressed kinase 7                                                                                                                        |
| 1416845_at   | 1.252 | Hspa5bp1      | heat shock 70kDa protein 5 binding protein 1                                                                                                                                     |
| 1452111_at   | 1.247 | Mrps35        | mitochondrial ribosomal protein S35                                                                                                                                              |
| 1426475_at   | 1.244 | Hmbs          | Similar to Hydroxymethylbilane synthase (LOC383565), mRNA                                                                                                                        |
| 1427903_at   | 1.242 | Phpt1         | RIKEN cDNA 1700008C22 gene                                                                                                                                                       |
| 1418888_a_at | 1.239 | Sepr          | selenoprotein R                                                                                                                                                                  |
| 1418991_at   | 1.235 | Bak1          | BCL2-antagonist/killer 1                                                                                                                                                         |
| 1416782_s_at | 1.235 | DXlmx39e      | DNA segment, Chr X, Immunex 39, expressed                                                                                                                                        |
| 1427119_at   | 1.230 | Spink4        | serine protease inhibitor, Kazal type 4                                                                                                                                          |
| 1417285_a_at | 1.230 | Ndufa5        | NADH dehydrogenase (ubiquinone) 1 alpha subcomplex, 5                                                                                                                            |
| 1417340_at   | 1.223 | Txnl2         | thioredoxin-like 2                                                                                                                                                               |
| 1449138_at   | 1.222 | Sf3b1         | splicing factor 3b, subunit 1                                                                                                                                                    |

|              |       |               |                                                                                                                    |
|--------------|-------|---------------|--------------------------------------------------------------------------------------------------------------------|
| 1422527_at   | 1.221 | H2-DMA        | histocompatibility 2, class II, locus DMA                                                                          |
| 1450162_at   | 1.219 | Dpf3          | D4, zinc and double PHD fingers, family 3                                                                          |
| 1454870_x_at | 1.218 | D15ErtD747e   | DNA segment, Chr 15, ERATO Doi 747, expressed                                                                      |
| 1451399_at   | 1.218 | Brp17         | brain protein 17                                                                                                   |
| 1460739_at   | 1.217 | D11Bwg0280e   | DNA segment, Chr 11, Brigham & Women's Genetics 0280e expressed                                                    |
| 1460718_s_at | 1.216 | Mtch1         | mitochondrial carrier homolog 1 (C. elegans)                                                                       |
| 1418225_at   | 1.215 | Orc2l         | origin recognition complex, subunit 2-like (S. cerevisiae)                                                         |
| 1427173_a_at | 1.213 | Mrps33        | mitochondrial ribosomal protein S33                                                                                |
| 1422430_at   | 1.212 | Fignl1        | fidgetin-like 1                                                                                                    |
| 1426940_at   | 1.209 | BC023957      | cDNA sequence BC023957                                                                                             |
| 1418439_at   | 1.208 | 2900055D03Rik | RIKEN cDNA 2900055D03 gene                                                                                         |
| 1449855_s_at | 1.206 | Uchl3         | ubiquitin carboxyl-terminal esterase L3 (ubiquitin thiolesterase)                                                  |
| 1416243_a_at | 1.203 | Rpl35         | ribosomal protein L35                                                                                              |
| 1418567_a_at | 1.200 | Srp14         | signal recognition particle 14                                                                                     |
| 1451385_at   | 1.199 | 2310056P07Rik | RIKEN cDNA 2310056P07 gene                                                                                         |
| 1416062_at   | 1.196 | Tbc1d15       | TBC1 domain family, member 15                                                                                      |
| 1415971_at   | 1.192 | Marcks        | myristoylated alanine rich protein kinase C substrate                                                              |
| 1427764_a_at | 1.189 | Tcfe2a        | transcription factor E2a                                                                                           |
| 1424708_at   | 1.188 | 1110014C03Rik | RIKEN cDNA 1110014C03 gene                                                                                         |
| 1424269_a_at | 1.187 | Myl6          | myosin light chain, alkali, nonmuscle                                                                              |
| 1435067_at   | 1.187 | B230208H17Rik | RIKEN cDNA B230208H17 gene                                                                                         |
| 1448604_at   | 1.185 | AA407809      | expressed sequence AA407809                                                                                        |
| 1424988_at   | 1.184 | Mylip         | myosin regulatory light chain interacting protein                                                                  |
| 1433472_x_at | 1.182 | Rpl38         | RIKEN cDNA 0610025G13 gene                                                                                         |
| 1421889_a_at | 1.180 | Aplp2         | amyloid beta (A4) precursor-like protein 2                                                                         |
| 1435232_x_at | 1.173 | Mrpl15        | mitochondrial ribosomal protein L15                                                                                |
| 1425194_a_at | 1.173 | 6330577E15Rik | RIKEN cDNA 6330577E15 gene                                                                                         |
| 1424204_at   | 1.173 | Mrpl13        | mitochondrial ribosomal protein L13                                                                                |
| 1415997_at   | 1.170 | Txnip         | thioredoxin interacting protein                                                                                    |
| 1417379_at   | 1.168 | Iqgap1        | IQ motif containing GTPase activating protein 1                                                                    |
| 1415762_x_at | 1.164 | Mrpl52        | mitochondrial ribosomal protein L52                                                                                |
| 1448543_at   | 1.163 | 2310042G06Rik | RIKEN cDNA 2310042G06 gene                                                                                         |
| 1424515_at   | 1.162 |               | BB440272 RIKEN full-length enriched, 9 days embryo Mus musculus cDNA clone D030020O16 3', mRNA sequence.           |
| 1417320_at   | 1.161 | Grpel1        | GrpE-like 1, mitochondrial                                                                                         |
| 1434120_a_at | 1.159 | Metap2        | methionine aminopeptidase 2                                                                                        |
| 1437679_a_at | 1.159 | Glrx2         | BB172698 RIKEN full-length enriched, adult male hypothalamus Mus musculus cDNA clone A230040G05 3', mRNA sequence. |
| 1423764_s_at | 1.158 | Mrpl37        | mitochondrial ribosomal protein L37                                                                                |
| 1428842_a_at | 1.155 | Ngfrap1       | nerve growth factor receptor (TNFRSF16) associated protein 1                                                       |
| 1423680_at   | 1.155 | Fads1         | RIKEN cDNA 0710001O03 gene                                                                                         |
| 1421861_at   | 1.155 | Clstn1        | calsyntenin 1                                                                                                      |
| 1434924_at   | 1.149 | Phf2          | PHD finger protein 2                                                                                               |
| 1426480_at   | 1.148 | Sbds          | Shwachman-Bodian-Diamond syndrome homolog (human)                                                                  |
| 1417481_at   | 1.146 | Ramp1         | receptor (calcitonin) activity modifying protein 1                                                                 |
| 1420628_at   | 1.145 | Pura          | purine rich element binding protein A                                                                              |
| 1452272_a_at | 1.144 | Gfer          | growth factor, erv1 (S. cerevisiae)-like (augmenter of liver regeneration)                                         |
| 1428310_at   | 1.142 | D3Wsu161e     | RIKEN cDNA C330027G06 gene                                                                                         |
| 1428823_at   | 1.140 | 2310057G13Rik | RIKEN cDNA 2310057G13 gene                                                                                         |
| 1424773_at   | 1.140 | 1110012M11Rik | RIKEN cDNA 1110012M11 gene                                                                                         |
| 1418248_at   | 1.140 | Gla           | galactosidase, alpha                                                                                               |

|              |       |               |                                                                                                                                                                     |
|--------------|-------|---------------|---------------------------------------------------------------------------------------------------------------------------------------------------------------------|
| 1418123_at   | 1.140 | Unc119        | unc-119 homolog (C. elegans)                                                                                                                                        |
| 1417773_at   | 1.139 | Nans          | 602916387F1 NCI_CGAP_Lu29 Mus musculus cDNA clone IMAGE:5067068 5', mRNA sequence.                                                                                  |
| 1423240_at   | 1.134 | Src           | Rous sarcoma oncogene                                                                                                                                               |
| 1423919_at   | 1.133 | BC023882      | cDNA sequence BC023882                                                                                                                                              |
| 1448292_at   | 1.129 | Uqcr          | ubiquinol-cytochrome c reductase (6.4kD) subunit                                                                                                                    |
| 1455288_at   | 1.128 | 1110036O03Rik | RIKEN cDNA 1110036O03 gene                                                                                                                                          |
| 1450106_a_at | 1.127 | Evl           | Ena-vasodilator stimulated phosphoprotein                                                                                                                           |
| 1426895_at   | 1.124 | Zfp191        | BB579760 RIKEN full-length enriched, 1 day pregnant adult female ovary Mus musculus cDNA clone 7230402O10 5', mRNA sequence.                                        |
| 1418704_at   | 1.122 | S100a13       | S100 calcium binding protein A13                                                                                                                                    |
| 1426648_at   | 1.122 | Mapkapk2      | MAP kinase-activated protein kinase 2                                                                                                                               |
| 1416519_at   | 1.120 | Rpl36         | ribosomal protein L36                                                                                                                                               |
| 1417368_s_at | 1.116 | Ndufa2        | NADH dehydrogenase (ubiquinone) 1 alpha subcomplex, 2                                                                                                               |
| 1435413_x_at | 1.115 | 2700060E02Rik | AV167958 Mus musculus head C57BL/6J 13-day embryo Mus musculus cDNA clone 3110059K19, mRNA sequence.                                                                |
| 1418000_a_at | 1.115 | Itn2b         | integral membrane protein 2B                                                                                                                                        |
| 1419550_a_at | 1.113 | Stk39         | 6 days neonate head cDNA, RIKEN full-length enriched library, clone:5430411A13 product:serine/threonine kinase 39, STE20/SPS1 homolog (yeast), full insert sequence |
| 1450640_x_at | 1.109 | Atp5k         | ATP synthase, H <sup>+</sup> transporting, mitochondrial F1F0 complex, subunit e                                                                                    |
| 1421395_at   | 1.108 | Zik1          | zinc finger protein interacting with K protein 1                                                                                                                    |
| 1451602_at   | 1.105 | Snx6          | sorting nexin 6                                                                                                                                                     |
| 1424073_at   | 1.100 | 5430437P03Rik | RIKEN cDNA 5430437P03 gene                                                                                                                                          |
| 1426811_at   | 1.099 | Ppp2r5b       | glycoprotein hormone alpha 2                                                                                                                                        |
| 1434019_at   | 1.099 | Pdap1         | PDGFA associated protein 1                                                                                                                                          |
| 1437976_x_at | 1.097 | BC029892      | Similar to 60S ribosomal protein L23a (LOC268449), mRNA                                                                                                             |
| 1452099_at   | 1.097 | AA408296      | expressed sequence AA408296                                                                                                                                         |
| 1417026_at   | 1.096 | Pfdn1         | prefoldin 1                                                                                                                                                         |
| 1448346_at   | 1.095 | Cfl1          | cofilin 1, non-muscle                                                                                                                                               |
| 1450668_s_at | 1.094 | Hspe1         | heat shock protein 1 (chaperonin 10)                                                                                                                                |
| 1416636_at   | 1.093 | Rheb          | RAS-homolog enriched in brain                                                                                                                                       |
| 1416285_at   | 1.093 | Ndufc1        | NADH dehydrogenase (ubiquinone) 1, subcomplex unknown, 1                                                                                                            |
| 1418625_s_at | 1.090 | LOC14433      | glyceraldehyde-3-phosphate dehydrogenase                                                                                                                            |
| 1415879_a_at | 1.088 | Rplp2         | ribosomal protein, large P2                                                                                                                                         |
| 1416074_a_at | 1.088 | Rpl28         | ribosomal protein L28                                                                                                                                               |
| 1450700_at   | 1.088 | Cdc42ep3      | CDC42 effector protein (Rho GTPase binding) 3                                                                                                                       |
| 1424488_a_at | 1.087 | 1110013G13Rik | RIKEN cDNA 1110013G13 gene                                                                                                                                          |
| 1454760_at   | 1.086 | 2600017A12Rik | RIKEN cDNA 2600017A12 gene                                                                                                                                          |
| 1449108_at   | 1.086 | Fdx1          | ferredoxin 1                                                                                                                                                        |
| 1417585_at   | 1.085 | Nup210        | nucleoporin 210                                                                                                                                                     |
| 1423133_at   | 1.085 | 0610040D20Rik | RIKEN cDNA 0610040D20 gene                                                                                                                                          |
| 1435112_a_at | 1.083 | Atp5h         | ATP synthase, H <sup>+</sup> transporting, mitochondrial F0 complex, subunit d                                                                                      |
| 1456373_x_at | 1.079 |               | ribosomal protein S20                                                                                                                                               |
| 1437767_s_at | 1.079 | Fts           | retinoblastoma-like 2                                                                                                                                               |
| 1426244_at   | 1.079 | Mapre2        | microtubule-associated protein, RP/EB family, member 2                                                                                                              |
| 1418022_at   | 1.076 | Narg1         | NMDA receptor-regulated gene 1                                                                                                                                      |
| 1451747_a_at | 1.075 | Apg12l        | autophagy 12-like (S. cerevisiae)                                                                                                                                   |
| 1451425_a_at | 1.075 | Mkrn1         | makorin, ring finger protein, 1                                                                                                                                     |
| 1450878_at   | 1.074 | Sri           | RIKEN cDNA 2210417O06 gene                                                                                                                                          |
| 1436949_a_at | 1.073 | Tceb2         | AV068352 Mus musculus small intestine C57BL/6J adult Mus musculus cDNA clone 2010303D07, mRNA sequence.                                                             |
| 1415811_at   | 1.073 | Uhrf1         | ubiquitin-like, containing PHD and RING finger domains, 1                                                                                                           |

|              |       |               |                                                                                                                                                              |
|--------------|-------|---------------|--------------------------------------------------------------------------------------------------------------------------------------------------------------|
| 1451432_x_at | 1.070 | 2010004B12Rik | RIKEN cDNA 2010004B12 gene                                                                                                                                   |
| 1448971_at   | 1.070 | 2410022L05Rik | RIKEN cDNA 2410022L05 gene                                                                                                                                   |
| 1416480_a_at | 1.070 | Hig1          | hypoxia induced gene 1                                                                                                                                       |
| 1426323_x_at | 1.064 | Siva          | Cd27 binding protein (Hindu God of destruction)                                                                                                              |
| 1417511_at   | 1.062 | Lyar          | Ly1 antibody reactive clone                                                                                                                                  |
| 1427143_at   | 1.060 | Jarid1b       | jumonji, AT rich interactive domain 1B (Rbp2 like)                                                                                                           |
| 1436859_at   | 1.060 | 2700007P21Rik | RIKEN cDNA 2700007P21 gene                                                                                                                                   |
| 1418901_at   | 1.058 | Cebpb         | CCAAT/enhancer binding protein (C/EBP), beta                                                                                                                 |
| 1448656_at   | 1.057 | Cacnb3        | calcium channel, voltage-dependent, beta 3 subunit                                                                                                           |
| 1452585_at   | 1.057 | Mrps28        | mitochondrial ribosomal protein S28                                                                                                                          |
| 1456243_x_at | 1.056 | Mcl1          | BB374534 RIKEN full-length enriched, 16 days embryo head Mus musculus cDNA clone C130075117 3' similar to U35623 Mus musculus EAT/MCL-1 mRNA, mRNA sequence. |
| 1417792_at   | 1.054 | Np220         | nuclear protein 220                                                                                                                                          |
| 1426529_a_at | 1.052 | Tagln2        | transgelin 2                                                                                                                                                 |
| 1448284_a_at | 1.051 | Ndufc1        | NADH dehydrogenase (ubiquinone) 1, subcomplex unknown, 1                                                                                                     |
| 1460354_a_at | 1.050 | Mrpl13        | mitochondrial ribosomal protein L13                                                                                                                          |
| 1415950_a_at | 1.048 | Pbp           | phosphatidylethanolamine binding protein                                                                                                                     |
| 1422134_at   | 1.047 | Fosb          | FBJ osteosarcoma oncogene B                                                                                                                                  |
| 1417774_at   | 1.045 | Nans          | 602916387F1 NCI_CGAP_Lu29 Mus musculus cDNA clone IMAGE:5067068 5', mRNA sequence.                                                                           |
| 1424894_at   | 1.045 | Rab13         | RAB13, member RAS oncogene family                                                                                                                            |
| 1437975_a_at | 1.043 | BC029892      | Similar to 60S ribosomal protein L23a (LOC268449), mRNA                                                                                                      |
| 1439234_a_at | 1.042 | 2410018G23Rik | RIKEN cDNA 2410018G23 gene                                                                                                                                   |
| 1438058_s_at | 1.041 | Ptov1         | prostate tumor over expressed gene 1                                                                                                                         |
| 1418714_at   | 1.041 | Dusp8         | dual specificity phosphatase 8                                                                                                                               |
| 1424456_at   | 1.037 | Pvrl2         | poliovirus receptor-related 2                                                                                                                                |
| 1433549_x_at | 1.036 | Rps21         | ribosomal protein S21                                                                                                                                        |
| 1435712_a_at | 1.033 | Rps18         | Transcribed sequence with strong similarity to protein ref:NP_072045.1 (H.sapiens) ribosomal protein S18; 40S ribosomal protein S18 [Homo sapiens]           |
| 1451012_a_at | 1.032 | Csda          | AV216648 RIKEN full-length enriched, ES cells Mus musculus cDNA clone 2410165103 3' similar to D14485 Mouse mRNA for dbpA murine homologue, mRNA sequence.   |
| 1418656_at   | 1.032 | Lsm5          | LSM5 homolog, U6 small nuclear RNA associated (S. cerevisiae)                                                                                                |
| 1448592_at   | 1.031 | Crtap         | cartilage associated protein                                                                                                                                 |
| 1455129_at   | 1.030 | 2610103J23Rik | RIKEN cDNA 2610103J23 gene                                                                                                                                   |
| 1433991_x_at | 1.030 | Dbi           | diazepam binding inhibitor                                                                                                                                   |
| 1433946_at   | 1.028 | Zik1          | zinc finger protein interacting with K protein 1                                                                                                             |
| 1421131_a_at | 1.028 | Zfp111        | zinc finger protein 111                                                                                                                                      |
| 1416250_at   | 1.027 | Btg2          | B-cell translocation gene 2, anti-proliferative                                                                                                              |
| 1438659_x_at | 1.027 | 0710001P09Rik | BB458460 RIKEN full-length enriched, 12 days embryo spinal ganglion Mus musculus cDNA clone D130057E08 3', mRNA sequence.                                    |
| 1419351_a_at | 1.025 | 0610007P06Rik | RIKEN cDNA 0610007P06 gene                                                                                                                                   |
| 1433721_x_at | 1.024 | Rps21         | ribosomal protein S21                                                                                                                                        |
| 1416245_at   | 1.023 | 0610033H09Rik | RIKEN cDNA 0610033H09 gene                                                                                                                                   |
| 1421152_a_at | 1.021 | Gnao          | guanine nucleotide binding protein, alpha o                                                                                                                  |
| 1450981_at   | 1.020 | Cnn2          | calponin 2                                                                                                                                                   |
| 1450925_a_at | 1.019 | Rps27l        | ribosomal protein S27-like                                                                                                                                   |
| 1424771_at   | 1.019 | E130307C13    | hypothetical protein E130307C13                                                                                                                              |
| 1449289_a_at | 1.018 | B2m           | RIKEN cDNA E130113K22 gene                                                                                                                                   |
| 1452002_at   | 1.018 | BC024969      | cDNA sequence BC024969                                                                                                                                       |
| 1428189_at   | 1.018 | 5730494M16Rik | RIKEN cDNA 5730494M16 gene                                                                                                                                   |
| 1456745_x_at | 1.018 | Sdbcag84      | serologically defined breast cancer antigen 84                                                                                                               |
| 1427511_at   | 1.014 | B2m           | beta-2 microglobulin                                                                                                                                         |

|              |       |               |                                                                                                                                                                                                |
|--------------|-------|---------------|------------------------------------------------------------------------------------------------------------------------------------------------------------------------------------------------|
| 1455364_a_at | 1.013 | Rps7          | Similar to Rpl7a protein (LOC245667), mRNA                                                                                                                                                     |
| 1425196_a_at | 1.011 | Hint2         | histidine triad nucleotide binding protein 2                                                                                                                                                   |
| 1451211_a_at | 1.009 | Lgtn          | ligatin                                                                                                                                                                                        |
| 1424222_s_at | 1.008 | Rad23b        | Mus musculus cDNA clone IMAGE:3256899, complete cds.                                                                                                                                           |
| 1421955_a_at | 1.008 | Nedd4         | neural precursor cell expressed, developmentally down-regulated gene 4                                                                                                                         |
| 1417102_a_at | 1.007 | Ndubf5        | NADH dehydrogenase (ubiquinone) 1 beta subcomplex, 5                                                                                                                                           |
| 1417879_at   | 1.007 | 1110060M21Rik | RIKEN cDNA 1110060M21 gene                                                                                                                                                                     |
| 1448344_at   | 1.003 | Rps12         | ribosomal protein S12                                                                                                                                                                          |
| 1448699_at   | 1.002 | Mrpl54        | mitochondrial ribosomal protein L54                                                                                                                                                            |
| 1448086_at   | 1.001 | D1Ert164e     | Transcribed sequences                                                                                                                                                                          |
| 1426510_at   | 1.000 | C330023F11Rik | RIKEN cDNA C330023F11 gene                                                                                                                                                                     |
| 1452679_at   | 1.000 | 2410129E14Rik | Transcribed sequence with strong similarity to protein ref:NP_001060.1 (H.sapiens) tubulin, beta polypeptide [Homo sapiens]                                                                    |
| 1416247_at   | 0.999 | Dctn3         | dynactin 3                                                                                                                                                                                     |
| 1424738_at   | 0.999 | 4932432K03Rik | RIKEN cDNA 4932432K03 gene                                                                                                                                                                     |
| 1417183_at   | 0.996 | Dnaja2        | DnaJ (Hsp40) homolog, subfamily A, member 2                                                                                                                                                    |
| 1452754_at   | 0.996 | 5730592L21Rik | RIKEN cDNA 5730592L21 gene                                                                                                                                                                     |
| 1460697_s_at | 0.995 | 2610209M04Rik | RIKEN cDNA 2610209M04 gene                                                                                                                                                                     |
| 1417869_s_at | 0.994 | Ctsz          |                                                                                                                                                                                                |
| 1433554_at   | 0.994 | AU022870      | hypothetical protein MGC56855                                                                                                                                                                  |
| 1438986_x_at | 0.994 | Rps17         | ribosomal protein S17                                                                                                                                                                          |
| 1426680_at   | 0.993 | Sepn1         | RIKEN cDNA 1110019I12 gene                                                                                                                                                                     |
| 1452315_at   | 0.992 | Kif11         | kinesin family member 11                                                                                                                                                                       |
| 1444952_a_at | 0.991 | 8430423A01Rik | RIKEN cDNA 8430423A01 gene                                                                                                                                                                     |
| 1452370_s_at | 0.990 | B230208H17Rik | RIKEN cDNA B230208H17 gene                                                                                                                                                                     |
| 1422720_at   | 0.989 | Isl1          | UI-M-DJ2-bwa-g-01-0-UI.s1 NIH_BMAP_DJ2 Mus musculus cDNA clone UI-M-DJ2-bwa-g-01-0-UI 3', mRNA sequence.                                                                                       |
| 1451255_at   | 0.988 | Lisch7        | liver-specific bHLH-Zip transcription factor                                                                                                                                                   |
| 1428214_at   | 0.988 | Tomm7         | translocase of outer mitochondrial membrane 7 homolog (yeast)                                                                                                                                  |
| 1423087_a_at | 0.987 | 1110002E23Rik | RIKEN cDNA 1110002E23 gene                                                                                                                                                                     |
| 1423365_at   | 0.987 | Cacna1g       | calcium channel, voltage-dependent, T type, alpha 1G subunit                                                                                                                                   |
| 1434976_x_at | 0.985 | Eif4ebp1      | AV216412 RIKEN full-length enriched, ES cells Mus musculus cDNA clone 2410160M04 3' similar to U28656 Mus musculus insulin-stimulated eIF-4E binding protein PHAS-I mRNA, mRNA sequence.       |
| 1456540_s_at | 0.982 | Mtmt6         | BB297632 RIKEN full-length enriched, 9.5 days embryo parthenogenote Mus musculus cDNA clone B130063F15 3' similar to AF072928 Homo sapiens myotubularin related protein 6 mRNA, mRNA sequence. |
| 1448498_at   | 0.981 | Rps6ka4       | ribosomal protein S6 kinase, polypeptide 4                                                                                                                                                     |
| 1448876_at   | 0.978 | Evc           | Ellis van Creveld gene homolog (human)                                                                                                                                                         |
| 1418545_at   | 0.978 | Wasf1         | WASP family 1                                                                                                                                                                                  |
| 1437947_x_at | 0.976 | Vdac1         | AV036172 Mus musculus adult C57BL/6J placenta Mus musculus cDNA clone 1600017H06, mRNA sequence.                                                                                               |
| 1417131_at   | 0.973 | Cdc25a        | C76119 Mouse 3.5-dpc blastocyst cDNA Mus musculus cDNA clone J0003H02 3' similar to Rat mRNA for cdc25A, mRNA sequence.                                                                        |
| 1423294_at   | 0.972 | Mest          | Transcribed sequence with moderate similarity to protein sp:Q9UBF2 (H.sapiens) CPG2_HUMAN Coatomer gamma-2 subunit                                                                             |
| 1460424_at   | 0.971 | 1810008O21Rik | RIKEN cDNA 1810008O21 gene                                                                                                                                                                     |
| 1422451_at   | 0.967 | Mrps21        | mitochondrial ribosomal protein S21                                                                                                                                                            |
| 1422524_at   | 0.967 | Abcb6         | ATP-binding cassette, sub-family B (MDR/TAP), member 6                                                                                                                                         |
| 1417357_at   | 0.966 | Emd           | emerin                                                                                                                                                                                         |
| 1426606_at   | 0.965 | Crtac1        | cartilage acidic protein 1                                                                                                                                                                     |

|              |       |               |                                                                                                                                                                                                                    |
|--------------|-------|---------------|--------------------------------------------------------------------------------------------------------------------------------------------------------------------------------------------------------------------|
| 1452181_at   | 0.965 | Ckap4         | BB312117 RIKEN full-length enriched, adult male corpora quadrigemina Mus musculus cDNA clone B230331K02 3' similar to X69910 H.sapiens p63 mRNA for transmembrane protein, mRNA sequence.                          |
| 1418986_a_at | 0.964 | Uxt           | ubiquitously expressed transcript                                                                                                                                                                                  |
| 1451071_a_at | 0.963 | Atp1a1        | ATPase, Na+/K+ transporting, alpha 1 polypeptide                                                                                                                                                                   |
| 1453550_a_at | 0.961 | 3732409C05Rik | RIKEN cDNA 3732409C05 gene                                                                                                                                                                                         |
| 1438776_x_at | 0.961 | Rps17         | AV046534 Mus musculus adult C57BL/6J testis Mus musculus cDNA clone 1700057O18, mRNA sequence.                                                                                                                     |
| 1424640_at   | 0.961 | 1110033P22Rik | RIKEN cDNA 1110033P22 gene                                                                                                                                                                                         |
| 1449040_a_at | 0.960 | Sephs2        | selenophosphate synthetase 2                                                                                                                                                                                       |
| 1417722_at   | 0.960 | Pgls          | 6-phosphogluconolactonase                                                                                                                                                                                          |
| 1422683_at   | 0.955 | Irak1bp1      | interleukin-1 receptor-associated kinase 1 binding protein 1                                                                                                                                                       |
| 1421881_a_at | 0.954 | Elavl2        | ELAV (embryonic lethal, abnormal vision, Drosophila)-like 2 (Hu antigen B)                                                                                                                                         |
| 1423181_s_at | 0.954 | Clns1a        | chloride channel, nucleotide-sensitive, 1A                                                                                                                                                                         |
| 1427282_a_at | 0.952 | Frda          | Friedreich ataxia                                                                                                                                                                                                  |
| 1416054_at   | 0.951 | Rps5          | ribosomal protein S5                                                                                                                                                                                               |
| 1448952_at   | 0.948 | A030009H04Rik | RIKEN cDNA A030009H04 gene                                                                                                                                                                                         |
| 1428954_at   | 0.947 | Slc9a3r2      | solute carrier family 9 (sodium/hydrogen exchanger), isoform 3 regulator 2                                                                                                                                         |
| 1418744_s_at | 0.946 | Tesc          | tescalcin                                                                                                                                                                                                          |
| 1421698_a_at | 0.946 | Col19a1       | procollagen, type XIX, alpha 1                                                                                                                                                                                     |
| 1451291_at   | 0.946 | 2610036N15Rik | RIKEN cDNA 2610036N15 gene                                                                                                                                                                                         |
| 1416696_at   | 0.943 | D17Wsu104e    | interleukin 25                                                                                                                                                                                                     |
| 1451017_at   | 0.942 | Sdbcag84      | BB556862 RIKEN full-length enriched, 2 days pregnant adult female ovary Mus musculus cDNA clone E330025K14 3' similar to AL161963 Homo sapiens mRNA; cDNA DKFZp547A2190 (from clone DKFZp547A2190), mRNA sequence. |
| 1420617_at   | 0.941 | Cpeb4         | cytoplasmic polyadenylation element binding protein 4                                                                                                                                                              |
| 1434230_at   | 0.941 | Polb          | polymerase (DNA directed), beta                                                                                                                                                                                    |
| 1449267_at   | 0.939 | 3110023E09Rik | RIKEN cDNA 3110023E09 gene                                                                                                                                                                                         |
| 1424750_at   | 0.939 | Zbtb1         | zinc finger and BTB domain containing 1                                                                                                                                                                            |
| 1417886_at   | 0.939 | 1810009A15Rik | RIKEN cDNA 1110055N21 gene                                                                                                                                                                                         |
| 1416412_at   | 0.937 | Nsmaf         | neutral sphingomyelinase (N-SMase) activation associated factor                                                                                                                                                    |
| 1418443_at   | 0.937 | Xpo1          | exportin 1, CRM1 homolog (yeast)                                                                                                                                                                                   |
| 1422520_at   | 0.936 | Nef3          | neurofilament 3, medium                                                                                                                                                                                            |
| 1425617_at   | 0.935 | Dhx9          | DEAH (Asp-Glu-Ala-His) box polypeptide 9                                                                                                                                                                           |
| 1430692_a_at | 0.934 | Sel1h         | Sel1 (suppressor of lin-12) 1 homolog (C. elegans)                                                                                                                                                                 |
| 1439466_s_at | 0.933 | Ptcd1         | BB001490 RIKEN full-length enriched, 13 days embryo head Mus musculus cDNA clone 3110026K15 3' similar to AF058791 Rattus norvegicus G10 protein homolog (edg2) mRNA, mRNA sequence.                               |
| 1434883_at   | 0.929 | 2610103J23Rik | RIKEN cDNA 2610103J23 gene                                                                                                                                                                                         |
| 1435652_a_at | 0.929 | Gnai2         | uz40a02.x1 NCI_CGAP_Mam5 Mus musculus cDNA clone IMAGE:3671498 3', mRNA sequence.                                                                                                                                  |
| 1452246_at   | 0.929 | Ostf1         | osteoclast stimulating factor 1                                                                                                                                                                                    |
| 1420513_at   | 0.928 | 1700073K01Rik | RIKEN cDNA 1700073K01 gene                                                                                                                                                                                         |
| 1416605_at   | 0.927 | Nola2         | nucleolar protein family A, member 2                                                                                                                                                                               |
| 1449194_at   | 0.926 | Mrps25        | mitochondrial ribosomal protein S25                                                                                                                                                                                |
| 1416349_at   | 0.926 | Mrpl34        | mitochondrial ribosomal protein L34                                                                                                                                                                                |
| 1424300_at   | 0.919 | Gemin6        | gem (nuclear organelle) associated protein 6                                                                                                                                                                       |
| 1417959_at   | 0.918 | Pdlim7        | PDZ and LIM domain 7                                                                                                                                                                                               |
| 1418743_a_at | 0.918 | Tesc          | tescalcin                                                                                                                                                                                                          |
| 1422525_at   | 0.918 | Atp5k         | ATP synthase, H+ transporting, mitochondrial F1F0 complex, subunit e                                                                                                                                               |
| 1421817_at   | 0.913 | Gsr           | glutathione reductase 1                                                                                                                                                                                            |
| 1427876_at   | 0.912 | 2610312B22Rik | RIKEN cDNA 2610312B22 gene                                                                                                                                                                                         |

|              |       |               |                                                                                                                                                                                                                                                                                                                                                                                                  |
|--------------|-------|---------------|--------------------------------------------------------------------------------------------------------------------------------------------------------------------------------------------------------------------------------------------------------------------------------------------------------------------------------------------------------------------------------------------------|
| 1422977_at   | 0.912 | Gp1bb         | glycoprotein lb, beta polypeptide                                                                                                                                                                                                                                                                                                                                                                |
| 1423897_at   | 0.907 | 2410016F01Rik | RIKEN cDNA 2410016F01 gene                                                                                                                                                                                                                                                                                                                                                                       |
| 1439451_x_at | 0.906 | D15Ert747e    | BB487787 RIKEN full-length enriched, 13 days embryo lung Mus musculus cDNA clone D430044J16 3', mRNA sequence.                                                                                                                                                                                                                                                                                   |
| 1430295_at   | 0.906 | Gna13         | guanine nucleotide binding protein, alpha 13                                                                                                                                                                                                                                                                                                                                                     |
| 1423242_at   | 0.906 | Mrps36        | mitochondrial ribosomal protein S36                                                                                                                                                                                                                                                                                                                                                              |
| 1436803_a_at | 0.903 | Ndufb9        | NADH dehydrogenase (ubiquinone) 1 beta subcomplex, 9                                                                                                                                                                                                                                                                                                                                             |
| 1421266_s_at | 0.902 | Nfkbib        | nuclear factor of kappa light chain gene enhancer in B-cells inhibitor, beta                                                                                                                                                                                                                                                                                                                     |
| 1418588_at   | 0.902 | Vmp           | vesicular membrain protein p24                                                                                                                                                                                                                                                                                                                                                                   |
| 1448737_at   | 0.901 | Tm4sf2        | transmembrane 4 superfamily member 2                                                                                                                                                                                                                                                                                                                                                             |
| 1416022_at   | 0.899 | Fabp5         | fatty acid binding protein 5, epidermal                                                                                                                                                                                                                                                                                                                                                          |
| 1456584_x_at | 0.898 | Phgdh         | BB495884 RIKEN full-length enriched, 13 days embryo stomach Mus musculus cDNA clone D530050H10 3' similar to L21027 Mus musculus A10 mRNA, mRNA sequence.                                                                                                                                                                                                                                        |
| 1439410_x_at | 0.897 | 3010027G13Rik | RIKEN cDNA 3010027G13 gene                                                                                                                                                                                                                                                                                                                                                                       |
| 1423321_at   | 0.896 | Myadm         | myeloid-associated differentiation marker                                                                                                                                                                                                                                                                                                                                                        |
| 1416965_at   | 0.893 | Pcsk1n        | proprotein convertase subtilisin/kexin type 1 inhibitor                                                                                                                                                                                                                                                                                                                                          |
| 1423653_at   | 0.893 | Atp1a1        | ATPase, Na <sup>+</sup> /K <sup>+</sup> transporting, alpha 1 polypeptide                                                                                                                                                                                                                                                                                                                        |
| 1423993_at   | 0.890 | Atp6v1f       | ATPase, H <sup>+</sup> transporting, V1 subunit F                                                                                                                                                                                                                                                                                                                                                |
| 1419456_at   | 0.890 | Dcxr          | dicarbonyl L-xylulose reductase                                                                                                                                                                                                                                                                                                                                                                  |
| 1451745_a_at | 0.889 | Znhit1        | zinc finger, HIT domain containing 1                                                                                                                                                                                                                                                                                                                                                             |
| 1423746_at   | 0.889 | Txndc5        | thioredoxin domain containing 5                                                                                                                                                                                                                                                                                                                                                                  |
| 1450389_s_at | 0.889 | Pip5k1a       | phosphatidylinositol-4-phosphate 5-kinase, type 1 alpha                                                                                                                                                                                                                                                                                                                                          |
| 1433616_a_at | 0.888 | 2310028O11Rik | Adult male xiphoid cartilage cDNA, RIKEN full-length enriched library, clone:5230400C04 product:unknown EST, full insert sequence                                                                                                                                                                                                                                                                |
| 1426641_at   | 0.887 | Trib2         | expressed sequence AW319517                                                                                                                                                                                                                                                                                                                                                                      |
| 1430571_s_at | 0.885 | 2410153K17Rik | unnamed protein product; hypothetical Armadillo repeat/Armadillo/plakoglobin ARM repeat profile containing protein (InterPro IPR000225, PROSITE PS50176, evidence: InterPro) putative; Mus musculus ES cells cDNA, RIKEN full-length enriched library, clone:2410153K17 product:hypothetical Armadillo repeat/Armadillo/plakoglobin ARM repeat profile containing protein, full insert sequence. |
| 1435364_at   | 0.883 |               | 4 days neonate male adipose cDNA, RIKEN full-length enriched library, clone:B430101C18 product:HYPOTHETICAL 19.9 KDA PROTEIN homolog [Homo sapiens], full insert sequence                                                                                                                                                                                                                        |
| 1421903_at   | 0.883 | 2810405O22Rik | RIKEN cDNA 2810405O22 gene                                                                                                                                                                                                                                                                                                                                                                       |
| 1456616_a_at | 0.880 | Bsg           | AV035166 Mus musculus adult C57BL/6J placenta Mus musculus cDNA clone 1600013O06, mRNA sequence.                                                                                                                                                                                                                                                                                                 |
| 1424171_a_at | 0.879 | Hagh          | hydroxyacyl glutathione hydrolase                                                                                                                                                                                                                                                                                                                                                                |
| 1423507_a_at | 0.879 | Sirt2         | Transcribed sequence with moderate similarity to protein ref:NP_036369.2 (H.sapiens) sirtuin 2, isoform 1; SIR2                                                                                                                                                                                                                                                                                  |
| 1451386_at   | 0.879 | Blvrb         | biliverdin reductase B (flavin reductase (NADPH))                                                                                                                                                                                                                                                                                                                                                |
| 1448824_at   | 0.878 | Ube2j1        | ubiquitin-conjugating enzyme E2, J1                                                                                                                                                                                                                                                                                                                                                              |
| 1435690_at   | 0.878 | 9030624J02Rik | RIKEN cDNA 9030624J02 gene                                                                                                                                                                                                                                                                                                                                                                       |
| 1434325_x_at | 0.877 | Prkar1b       | BB274009 RIKEN full-length enriched, 10 days neonate cortex Mus musculus cDNA clone A830086C24 3', mRNA sequence.                                                                                                                                                                                                                                                                                |
| 1454807_a_at | 0.877 | Snx12         | sorting nexin 12                                                                                                                                                                                                                                                                                                                                                                                 |
| 1416528_at   | 0.875 | Sh3bgrl3      | SH3 domain binding glutamic acid-rich protein-like 3                                                                                                                                                                                                                                                                                                                                             |
| 1423959_at   | 0.874 | AV047578      | expressed sequence AV047578                                                                                                                                                                                                                                                                                                                                                                      |

<sup>a</sup> Five probes included by Affymetrix as controls were removed from this list

**TABLE S4. KEGG pathways identified by bioweight**

| Category                       | Pathway(s)                                                                                                           | Probe(s)                               | Gene          | Description                                                                               | Accession                      | R/P <sup>a</sup> |
|--------------------------------|----------------------------------------------------------------------------------------------------------------------|----------------------------------------|---------------|-------------------------------------------------------------------------------------------|--------------------------------|------------------|
| <b>Carbohydrate Metabolism</b> | Aminosugars metabolism; Fructose and mannose metabolism                                                              | 1425485_at, 1456540_s_at               | Mtmr6         | myotubularin related protein 6                                                            | BC020019, BB297632             | R                |
|                                | Aminosugars metabolism                                                                                               | 1417773_at, 1417774_at                 | Nans          | N-acetylneuraminic acid synthase (sialic acid synthase)                                   | BI151886                       | R                |
|                                | Aminosugars metabolism; Fructose and mannose metabolism                                                              | 1427903_at                             | Phpt1         | phosphohistidine phosphatase 1                                                            | BB650419                       | R                |
|                                | Galactose metabolism                                                                                                 | 1418248_at                             | Gla           | galactosidase, alpha                                                                      | NM_013463                      | R                |
|                                | Glycolysis / Gluconeogenesis; Pyruvate metabolism                                                                    | 1427943_at                             | Acyp2         | acylphosphatase 2, muscle type                                                            | BI730288                       | R                |
|                                | Glycolysis / Gluconeogenesis                                                                                         | 1418625_s_at                           | LOC14433      |                                                                                           | NM_008084                      | R                |
|                                | Inositol phosphate metabolism                                                                                        | 1450389_s_at                           | Pip5k1a       | phosphatidylinositol-4-phosphate 5-kinase, type 1 alpha                                   | NM_008846                      | R                |
|                                | Pentose and glucuronate interconversions; Fructose and mannose metabolism; Galactose metabolism; Pyruvate metabolism | 1437133_x_a, 1448319_at                | Akr1b3        | aldo-keto reductase family 1, member B3 (aldose reductase)                                | AV127085, NM_009658            | R                |
|                                | Pentose and glucuronate interconversions                                                                             | 1419456_at                             | Dcxr          | dicarbonyl L-xylulose reductase                                                           | BC012247                       | R                |
|                                | Pentose phosphate pathway                                                                                            | 1417722_at                             | Pgls          | 6-phosphogluconolactonase                                                                 | BC006594                       | R                |
|                                | Pyruvate metabolism                                                                                                  | 1424171_a_at, 1424172_at               | Hagh          | hydroxyacyl glutathione hydrolase                                                         | BC004749                       | R                |
|                                | Citrate cycle (TCA cycle)                                                                                            | 1425326_at                             | Acly          | ATP citrate lyase                                                                         | BI456232                       | P                |
|                                | Citrate cycle (TCA cycle)                                                                                            | 1451274_at                             | Ogdh          | oxoglutarate dehydrogenase (lipoamide)                                                    | BC013670                       | P                |
|                                | Starch and sucrose metabolism                                                                                        | 1448497_at                             | Ercc3         | excision repair cross-complementing rodent repair deficiency, complementation group3      | NM_133658                      | P                |
| <b>Energy Metabolism</b>       | Oxidative phosphorylation                                                                                            | 1424488_a_at                           | 1110013G13Rik | RIKEN cDNA 1110013G13 gene                                                                | BC011417                       | R                |
|                                | Oxidative phosphorylation; ATP synthesis                                                                             | 1415980_at                             | Atp5g2        | ATP synthase, H+ transporting, mitochondrial F0 complex, subunit c (subunit 9), isoform 2 | NM_026468                      | R                |
|                                | Oxidative phosphorylation; ATP synthesis                                                                             | 1423676_at, 1435112_a_at               | Atp5h         | ATP synthase, H+ transporting, mitochondrial F0 complex, subunit d                        | AF354051, AV154755             | R                |
|                                | Oxidative phosphorylation; ATP synthesis                                                                             | 1422525_at, 1434053_x_at, 1450640_x_at | Atp5k         | ATP synthase, H+ transporting, mitochondrial F1F0 complex, subunit e                      | NM_007507, AV216686, NM_007507 | R                |
|                                | Oxidative phosphorylation; ATP synthesis                                                                             | 1437164_x_at                           | Atp5o         | ATP synthase, H+ transporting, mitochondrial F1 complex, O subunit                        | AV066932                       | R                |
|                                | Oxidative phosphorylation; ATP synthesis                                                                             | 1416769_s_at, 1437013_x_at             | Atp6v0b       | ATPase, H+ transporting, V0 subunit B                                                     | NM_033617, AV339131            | R                |
|                                | Oxidative phosphorylation; ATP synthesis                                                                             | 1423993_at                             | Atp6v1f       | ATPase, H+ transporting, V1 subunit F                                                     | BC016553                       | R                |



|                                             |                              |         |                                                                             |                     |   |
|---------------------------------------------|------------------------------|---------|-----------------------------------------------------------------------------|---------------------|---|
| Oxidative phosphorylation                   | 1418709_at                   | Cox7a1  | cytochrome c oxidase, subunit VIIa 1                                        | AF037370            | R |
| Oxidative phosphorylation                   | 1416971_at                   | Cox7a2  | cytochrome c oxidase, subunit VIIa 2                                        | NM_009945           | R |
| Oxidative phosphorylation                   | 1429708_at                   | Ndufa11 | NADH dehydrogenase (ubiquinone) 1 alpha subcomplex 11                       | AA596846            | R |
| Oxidative phosphorylation                   | 1417368_s_at                 | Ndufa2  | NADH dehydrogenase (ubiquinone) 1 alpha subcomplex, 2                       | NM_010885           | R |
| Oxidative phosphorylation                   | 1428464_at,<br>1452790_x_at  | Ndufa3  | NADH dehydrogenase (ubiquinone) 1 alpha subcomplex, 3                       | AV048277            | R |
| Oxidative phosphorylation                   | 1417285_a_at                 | Ndufa5  | NADH dehydrogenase (ubiquinone) 1 alpha subcomplex, 5                       | NM_026614           | R |
| Oxidative phosphorylation                   | 1448427_at                   | Ndufa6  | NADH dehydrogenase (ubiquinone) 1 alpha subcomplex, 6 (B14)                 | NM_025987           | R |
| Oxidative phosphorylation                   | 1428360_x_at<br>1455749_x_at | Ndufa7  | NADH dehydrogenase (ubiquinone) 1 alpha subcomplex, 7 (B14.5a)              | BI558499,<br>C88880 | R |
| Oxidative phosphorylation                   | 1416057_at                   | Ndufb11 | NADH dehydrogenase (ubiquinone) 1 beta subcomplex, 11                       | BC027265            | R |
| Oxidative phosphorylation                   | 1416834_x_at<br>1448483_a_at | Ndufb2  | NADH dehydrogenase (ubiquinone) 1 beta subcomplex, 2                        | NM_026612           | R |
| Oxidative phosphorylation                   | 1428075_at,<br>1428076_s_at  | Ndufb4  | NADH dehydrogenase (ubiquinone) 1 beta subcomplex 4                         | BG968046            | R |
| Oxidative phosphorylation                   | 1417102_a_at<br>1448589_at   | Ndufb5  | NADH dehydrogenase (ubiquinone) 1 beta subcomplex, 5                        | BC025155            | R |
| Oxidative phosphorylation                   | 1448331_at                   | Ndufb7  | NADH dehydrogenase (ubiquinone) 1 beta subcomplex, 7                        | NM_025843           | R |
| Oxidative phosphorylation                   | 1448198_a_at                 | Ndufb8  | NADH dehydrogenase (ubiquinone) 1 beta subcomplex 8                         | NM_026061           | R |
| Oxidative phosphorylation                   | 1436803_a_at<br>1452184_at   | Ndufb9  | NADH dehydrogenase (ubiquinone) 1 beta subcomplex, 9                        | AV161987,<br>W29413 | R |
| Oxidative phosphorylation                   | 1416285_at,<br>1448284_a_at  | Ndufc1  | NADH dehydrogenase (ubiquinone) 1, subcomplex unknown, 1                    | NM_025523           | R |
| Oxidative phosphorylation                   | 1416494_at,<br>1416495_s_at  | Ndufs5  | NADH dehydrogenase (ubiquinone) Fe-S protein 5                              | NM_134104           | R |
| Oxidative phosphorylation                   | 1423907_a_at                 | Ndufs8  | NADH dehydrogenase (ubiquinone) Fe-S protein 8                              | BC021616            | R |
| Oxidative phosphorylation                   | 1428179_at                   | Ndufv2  | NADH dehydrogenase (ubiquinone) flavoprotein 2                              | BI692577            | R |
| Oxidative phosphorylation                   | 1448292_at                   | Uqcr    | ubiquinol-cytochrome c reductase (6.4kD) subunit                            | NM_025650           | R |
| Oxidative phosphorylation                   | 1416337_at                   | Uqcrb   | ubiquinol-cytochrome c reductase binding protein                            | NM_026219           | R |
| Methane metabolism                          | 1422198_a_at                 | Shmt1   | serine hydroxymethyl transferase 1 (soluble)                                | NM_009171           | P |
| Oxidative phosphorylation;<br>ATP synthesis | 1438809_at                   | Atp5c1  | ATP synthase, H+ transporting mitochondrial F1 complex, gamma polypeptide 1 | AI644507            | P |

|                                                             |                                                                            |                            |                             |                                                                                           |                     |   |
|-------------------------------------------------------------|----------------------------------------------------------------------------|----------------------------|-----------------------------|-------------------------------------------------------------------------------------------|---------------------|---|
|                                                             | Oxidative phosphorylation; ATP synthesis                                   | 1456128_at                 | Atp5g2                      | ATP synthase, H+ transporting, mitochondrial F0 complex, subunit c (subunit 9), isoform 2 | AW413339            | P |
|                                                             | Oxidative phosphorylation; ATP synthesis                                   | 1450634_at                 | Atp6v1a                     | ATPase, H+ transporting, V1 subunit A1                                                    | NM_007508           | P |
|                                                             | Oxidative phosphorylation                                                  | 1435934_at                 | Ndubfab1                    | NADH dehydrogenase (ubiquinone) 1, alpha/beta subcomplex1                                 | AI643884            | P |
| <b>Lipid Metabolism</b>                                     | Androgen and estrogen metabolism                                           | 1454987_a_at               | H2-Ke6                      | H2-K region expressed gene 6                                                              | AI323545            | R |
|                                                             | Biosynthesis of steroids                                                   | 1423804_a_at               | Idi1                        | isopentenyl-diphosphate delta isomerase                                                   | BC004801            | R |
|                                                             | Fatty acid biosynthesis                                                    | 1423828_at                 | Fasn                        | fatty acid synthase                                                                       | AF127033            | R |
|                                                             | Glycerolipid metabolism                                                    | 1437133_x_a, 1448319_at    | Akr1b3                      | aldo-keto reductase family 1, member B3 (aldose reductase)                                | AV127085, NM_009658 | R |
|                                                             | Glycerolipid metabolism; Sphingolipid metabolism                           | 1418248_at                 | Gla                         | galactosidase, alpha                                                                      | NM_013463           | R |
|                                                             | Sphingolipid metabolism                                                    | 1441866_s_at               | Ptdss1                      | phosphatidylserine synthase 1                                                             | BB526117            | R |
|                                                             | Fatty acid metabolism                                                      | 1451828_a_at               | Acsl4                       | acyl-CoA synthetase long-chain family member 4                                            | AB033886            | P |
|                                                             | Fatty acid metabolism                                                      | 1460409_at                 | Cpt1a                       | carnitine palmitoyltransferase 1a, liver                                                  | AI987925            | P |
|                                                             | Glycerophospholipid metabolism                                             | 1454633_at                 | Etnk1                       | ethanolamine kinase 1                                                                     | BG066916            | P |
|                                                             | Glycerophospholipid metabolism                                             | 1448086_at                 | Lypla1                      | lysophospholipase 1                                                                       | BG079429            | P |
| Glycerophospholipid metabolism; Arachidonic acid metabolism | 1454157_a_at                                                               | Pla2g2d                    | phospholipase A2, group IID | AK004232                                                                                  | P                   |   |
| <b>Nucleotide Metabolism</b>                                | Purine metabolism; Pyrimidine metabolism                                   | 1438177_x_at               | Entpd4                      | ectonucleoside triphosphate diphosphohydrolase 4                                          | AV255351            | R |
|                                                             | Purine metabolism; Pyrimidine metabolism                                   | 1424110_a_at, 1435277_x_at | Nme1                        | expressed in non-metastatic cells 1, protein                                              | BC005629, AV156640  | R |
|                                                             | Pyrimidine metabolism                                                      | 1423717_at                 | Ak3                         | adenylate kinase 3                                                                        | BC019174            | R |
|                                                             | Pyrimidine metabolism                                                      | 1448604_at                 | Uck2                        | uridine-cytidine kinase 2                                                                 | NM_030724           | R |
|                                                             | Purine metabolism; Pyrimidine metabolism                                   | 1419397_at                 | Pola1                       | polymerase (DNA directed), alpha 1                                                        | NM_008892           | P |
|                                                             | Purine metabolism; Pyrimidine metabolism                                   | 1448650_a_at               | Pole                        | polymerase (DNA directed), epsilon                                                        | NM_011132           | P |
|                                                             | Purine metabolism; Pyrimidine metabolism                                   | 1433552_a_at               | Polr2b                      | polymerase (RNA) II (DNA directed) polypeptide B                                          | BQ177004            | P |
|                                                             | Purine metabolism; Pyrimidine metabolism                                   | 1448127_at                 | Rrm1                        | ribonucleotide reductase M1                                                               | BB758819            | P |
| <b>Amino Acid Metabolism</b>                                | Arginine and proline metabolism; Urea cycle and metabolism of amino groups | 1455106_a_at               | Ckb                         | creatine kinase, brain                                                                    | BG967663            | R |
|                                                             | Arginine and proline metabolism; Urea cycle and metabolism of amino groups | 1421260_a_at               | Srm                         | spermidine synthase                                                                       | NM_009272           | R |
|                                                             | Glutamate metabolism                                                       | 1421817_at                 | Gsr                         | glutathione reductase 1                                                                   | AK019177            | R |
|                                                             | Glycine, serine and threonine metabolism                                   | 1426657_s_at, 1456471_x_at | Phgdh                       | 3-phosphoglycerate dehydrogenase                                                          | L21027, BB204486    | R |

|                                             |                                                                                                           |                                                                                                           |                          |                                                                                             |                                |                    |
|---------------------------------------------|-----------------------------------------------------------------------------------------------------------|-----------------------------------------------------------------------------------------------------------|--------------------------|---------------------------------------------------------------------------------------------|--------------------------------|--------------------|
|                                             | Glycine, serine and threonine metabolism                                                                  | 1415673_at                                                                                                | Psph                     | phosphoserine phosphatase                                                                   | NM_133900                      | R                  |
|                                             | Glycine, serine and threonine metabolism; Lysine degradation                                              | 1422198_a_at                                                                                              | Shmt1                    | serine hydroxymethyl transferase 1 (soluble)                                                | NM_009171                      | P                  |
|                                             | Methionine metabolism                                                                                     | 1435122_x_at                                                                                              | Dnmt1                    | DNA methyltransferase (cytosine-5) 1                                                        | BB165431                       | P                  |
|                                             | Tryptophan metabolism; Lysine degradation                                                                 | 1451274_at                                                                                                | Ogdh                     | oxoglutarate dehydrogenase (lipoamide)                                                      | BC013670                       | P                  |
|                                             | Tryptophan metabolism                                                                                     | 1424988_at                                                                                                | Myliip                   | myosin regulatory light chain interacting protein                                           | BC010206                       | P                  |
|                                             | Tryptophan metabolism                                                                                     | 1437354_at                                                                                                | Ube3a                    | ubiquitin protein ligase E3A                                                                | AI154956                       | P                  |
|                                             | Tryptophan metabolism                                                                                     | 1415811_at                                                                                                | Uhrf1                    | ubiquitin-like, containing PHD and RING finger domains, 1                                   | BB702754                       | P                  |
|                                             | Valine, leucine and isoleucine biosynthesis                                                               | 1452154_at                                                                                                | lars                     | isoleucine-tRNA synthetase                                                                  | BE915338                       | P                  |
| <b>Metabolism of Other Amino Acids</b>      | Aminophosphonate metabolism                                                                               | 1441866_s_at                                                                                              | Ptdss1                   | phosphatidylserine synthase 1                                                               | BB526117                       | R                  |
|                                             | beta-Alanine metabolism                                                                                   | 1421260_a_at                                                                                              | Srm                      | spermidine synthase                                                                         | NM_009272                      | R                  |
|                                             | Glutathione metabolism                                                                                    | 1421817_at                                                                                                | Gsr                      | glutathione reductase 1                                                                     | AK019177                       | R                  |
|                                             | Selenoamino acid metabolism                                                                               | 1449040_a_at                                                                                              | Sephs2                   | selenophosphate synthetase 2                                                                | NM_009266                      | R                  |
|                                             | Cyanoamino acid metabolism                                                                                | 1422198_a_at                                                                                              | Shmt1                    | serine hydroxymethyl transferase 1 (soluble)                                                | NM_009171                      | P                  |
|                                             | <b>Glycan Biosynthesis and Metabolism</b>                                                                 | Glycosphingolipid biosynthesis - globoseries                                                              | 1418248_at               | Gla                                                                                         | galactosidase, alpha           | NM_013463          |
| N-Glycan biosynthesis                       |                                                                                                           | 1416493_at                                                                                                | Ddost                    | dolichyl-di-phosphooligosaccharide-protein glycotransferase                                 | NM_007838                      | R                  |
| N-Glycan biosynthesis                       |                                                                                                           | 1448353_x_at                                                                                              | Rpn1                     | ribophorin I                                                                                | NM_133933                      | R                  |
| N-Glycan biosynthesis                       |                                                                                                           | 1418896_a_at                                                                                              | Rpn2                     | ribophorin II                                                                               | NM_019642                      | R                  |
| N-Glycan degradation                        |                                                                                                           | 1416109_at                                                                                                | Fuca1                    | fucosidase, alpha-L- 1, tissue                                                              | NM_024243                      | R                  |
| N-Glycan degradation                        |                                                                                                           | 1416584_at                                                                                                | Man2b2                   | mannosidase 2, alpha B2                                                                     | NM_008550                      | R                  |
| Chondroitin / Heparan sulfate biosynthesis  |                                                                                                           | 1422539_at                                                                                                | Extl2                    | exotoses (multiple)-like 2                                                                  | BM203810                       | P                  |
| <b>Metabolism of Cofactors and Vitamins</b> |                                                                                                           | Nicotinate and nicotinamide metabolism; Riboflavin metabolism; Thiamine metabolism; Vitamin B6 metabolism | 1425485_at, 1456540_s_at | Mtmr6                                                                                       | myotubularin related protein 6 | BC020019, BB297632 |
|                                             | Nicotinate and nicotinamide metabolism; Riboflavin metabolism; Thiamine metabolism; Vitamin B6 metabolism | 1427903_at                                                                                                | Phpt1                    | phosphohistidine phosphatase 1                                                              | BB650419                       | R                  |
|                                             | Nicotinate and nicotinamide metabolism; Pantothenate and CoA biosynthesis                                 | 1423507_a_at                                                                                              | Sirt2                    | sirtuin 2 (silent mating type information regulation 2, homolog) 2 ( <i>S. cerevisiae</i> ) | BB807595                       | R                  |
|                                             | Porphyrin and chlorophyll metabolism                                                                      | 1426475_at                                                                                                | Hmbs                     | hydroxymethylbilane synthase                                                                | AI325144                       | R                  |
|                                             | Ubiquinone biosynthesis                                                                                   | 1416057_at                                                                                                | Ndufb11                  | NADH dehydrogenase (ubiquinone) 1 beta subcomplex, 11                                       | BC027265                       | R                  |
|                                             | Folate biosynthesis                                                                                       | 1448497_at                                                                                                | Ercc3                    | excision repair cross-complementing rodent repair deficiency, complementation group3        | NM_133658                      | P                  |

|                                                  |                                       |              |        |                                                                                    |                                         |   |
|--------------------------------------------------|---------------------------------------|--------------|--------|------------------------------------------------------------------------------------|-----------------------------------------|---|
|                                                  | One carbon pool by folate             | 1422198_a_at | Shmt1  | serine hydroxymethyl transferase 1 (soluble)                                       | NM_009171                               | P |
| <b>Biosynthesis of Secondary Metabolites</b>     | Terpenoid biosynthesis                | 1423804_a_at | Idi1   | isopentenyl-diphosphate delta isomerase                                            | BC004801                                | R |
| <b>Xenobiotics Biodegradation and Metabolism</b> | Benzoate degradation via CoA ligation | 1427943_at   | Acyp2  | acylphosphatase 2, muscle type                                                     | BI730288                                | R |
|                                                  | Caprolactam degradation               | 1423507_a_at | Sirt2  | sirtuin 2 (silent mating type information regulation 2, homolog) 2 (S. cerevisiae) | BB807595                                | R |
| <b>Transcription</b>                             | Basal transcription factors           | 1422778_at   | Taf9   | TAF9 RNA polymerase II, TATA box binding protein (TBP)-associated factor           | NM_027139                               | R |
|                                                  | Basal transcription factors           | 1448784_at   | Taf10  | TAF10 RNA polymerase II, TATA box binding protein (TBP)-associated factor          | NM_020024                               | R |
|                                                  | RNA polymerase                        | 1433552_a_at | Polr2b | polymerase (RNA) II (DNA directed) polypeptide B                                   | BQ177004                                | P |
| <b>Translation</b>                               | Ribosome                              | 1460581_a_at | Rpl13  | ribosomal protein L13                                                              | AI506565                                | R |
|                                                  | Ribosome                              | 1433928_a_at | Rpl13a | ribosomal protein L13a                                                             | BF146301, AI324936                      | R |
|                                                  | Ribosome                              | 1454859_a_at | Rpl23  | ribosomal protein L23                                                              | AV124394                                | R |
|                                                  | Ribosome                              | 1426659_a_at | Rpl23a | ribosomal protein L23a                                                             | BF178310, BF178310, C87154, C87154      | R |
|                                                  | Ribosome                              | 1448217_a_at | Rpl27  | ribosomal protein L27                                                              | NM_011289                               | R |
|                                                  | Ribosome                              | 1416074_a_at | Rpl28  | ribosomal protein L28                                                              | NM_009081                               | R |
|                                                  | Ribosome                              | 1418273_a_at | Rpl30  | ribosomal protein L30                                                              | NM_009083                               | R |
|                                                  | Ribosome                              | 1416243_a_at | Rpl35  | ribosomal protein L35                                                              | NM_025592, AV124739, AV066335, AV172221 | R |
|                                                  | Ribosome                              | 1416519_at   | Rpl36  | ribosomal protein L36                                                              | NM_018730                               | R |
|                                                  | Ribosome                              | 1416807_at   | Rpl36a | ribosomal protein L36a                                                             | NM_019865                               | R |
|                                                  | Ribosome                              | 1434872_x_at | Rpl37  | ribosomal protein L37                                                              | AV170241                                | R |
|                                                  | Ribosome                              | 1433472_x_at | Rpl38  | ribosomal protein L38                                                              | AA050777                                | R |
|                                                  | Ribosome                              | 1415879_a_at | Rplp2  | ribosomal protein, large P2                                                        | BC012413                                | R |
|                                                  | Ribosome                              | 1415912_a_at | Rps13  | ribosomal protein S13                                                              | NM_026533                               | R |
|                                                  | Ribosome                              | 1438776_x_at | Rps17  | ribosomal protein S17                                                              | AV046534, AV064451                      | R |
|                                                  | Ribosome                              | 1435712_a_at | Rps18  | ribosomal protein S18                                                              | AW907444                                | R |
|                                                  | Ribosome                              | 1456373_x_at | Rps20  | ribosomal protein S20                                                              | AV046829                                | R |
|                                                  | Ribosome                              | 1433549_x_at | Rps21  | ribosomal protein S21                                                              | AV123618, AV123577, AV151252            | R |
|                                                  | Ribosome                              | 1436064_x_at | Rps24  | ribosomal protein S24                                                              | AV004977, AK008386, AV111319            | R |
|                                                  | Ribosome                              | 1415716_a_at | Rps27  | ribosomal protein S27                                                              | AA208652                                | R |
|                                                  | Ribosome                              | 1450925_a_at | Rps27l | ribosomal protein S27-like                                                         | BB836796                                | R |
|                                                  | Ribosome                              | 1416054_at   | Rps5   | ribosomal protein S5                                                               | NM_009095                               | R |
|                                                  | Ribosome                              | 1455364_a_at | Rps7   | ribosomal protein S7                                                               | AI414989                                | R |
|                                                  | Aminoacyl-tRNA biosynthesis           | 1452154_at   | lars   | isoleucine-tRNA synthetase                                                         | BE915338                                | P |

|                                         |                                                    |                          |          |                                                                              |                  |   |
|-----------------------------------------|----------------------------------------------------|--------------------------|----------|------------------------------------------------------------------------------|------------------|---|
| <b>Folding, Sorting and Degradation</b> | Protein export                                     | 1418567_a_at             | Srp14    | signal recognition particle 14                                               | NM_009273        | R |
| <b>Replication and Repair</b>           | DNA polymerase                                     | 1434230_at               | Polb     | polymerase (DNA directed), beta                                              | BG094331         | R |
|                                         | DNA polymerase                                     | 1419397_at               | Pola1    | polymerase (DNA directed), alpha 1                                           | NM_008892        | P |
|                                         | DNA polymerase                                     | 1448650_a_at             | Pole     | polymerase (DNA directed), epsilon                                           | NM_011132        | P |
| <b>Membrane Transport</b>               | ABC transporters - General                         | 1422524_at               | Abcb6    | ATP-binding cassette, sub-family B (MDR/TAP), member 6                       | NM_023732        | R |
|                                         | ABC transporters - General                         | 1423030_at, 1427490_at   | Abcb7    | ATP-binding cassette, sub-family B (MDR/TAP), member 7                       | A1195225, U43892 | P |
| <b>Signal Transduction</b>              | Calcium signaling                                  | 1423365_at               | Cacna1g  | calcium channel, voltage-dependent, T type, alpha 1G subunit                 | AW494038         | R |
|                                         | Calcium signaling                                  | 1449245_at               | Grin2c   | glutamate receptor, ionotropic, NMDA2C (epsilon 3)                           | NM_010350        | R |
|                                         | Calcium signaling                                  | 1437947_x_at             | Vdac1    | voltage-dependent anion channel 1                                            | AV036172         | R |
|                                         | Jak-STAT signaling                                 | 1419455_at               | Il10rb   | interleukin 10 receptor, beta                                                | NM_008349        | R |
|                                         | MAPK signaling                                     | 1418714_at               | Dusp8    | dual specificity phosphatase 8                                               | NM_008748        | R |
|                                         | MAPK signaling                                     | 1422615_at               | Map4k4   | mitogen-activated protein kinase kinase kinase 4                             | NM_008696        | R |
|                                         | MAPK signaling                                     | 1426648_at               | Mapkapk2 | MAP kinase-activated protein kinase 2                                        | BG918951         | R |
|                                         | MAPK signaling                                     | 1418300_a_at, 1449029_at | Mknk2    | MAP kinase-interacting serine/threonine kinase 2                             | NM_021462        | R |
|                                         | MAPK signaling                                     | 1448498_at               | Rps6ka4  | ribosomal protein S6 kinase, polypeptide 4                                   | NM_019924        | R |
|                                         | MAPK signaling                                     | 1418448_at               | Rras     | Harvey rat sarcoma oncogene, subgroup R                                      | NM_009101        | R |
|                                         | MAPK signaling                                     | 1418255_s_at, 1418256_at | Srf      | serum response factor                                                        | BI662291         | R |
|                                         | Notch signaling                                    | 1449080_at               | Hdac2    | histone deacetylase 2                                                        | NM_008229        | R |
|                                         | Phosphatidylinositol signaling                     | 1450389_s_at             | Pip5k1a  | phosphatidylinositol-4-phosphate 5-kinase, type 1 alpha                      | NM_008846        | R |
|                                         | TGF-beta signaling; Hedgehog signaling             | 1418910_at               | Bmp7     | bone morphogenetic protein 7                                                 | NM_007557        | R |
|                                         | TGF-beta signaling                                 | 1437767_s_at             | Rbl2     | retinoblastoma-like 2                                                        | AA138720         | R |
|                                         | Calcium signaling; Phosphatidylinositol signaling  | 1417279_at, 1460203_at   | Itpr1    | inositol 1,4,5-triphosphate receptor 1                                       | NM_010585        | P |
|                                         | Jak-STAT signaling                                 | 1419529_at               | Il23a    | interleukin 23, alpha subunit p19                                            | NM_031252        | P |
|                                         | Jak-STAT signaling                                 | 1452843_at               | Il6st    | interleukin 6 signal transducer                                              | AK017211         | P |
|                                         | Jak-STAT signaling                                 | 1433804_at               | Jak1     | Janus kinase 1                                                               | BQ032637         | P |
|                                         | Jak-STAT signaling                                 | 1422581_at               | Pias1    | protein inhibitor of activated STAT 1                                        | NM_019663        | P |
|                                         | Jak-STAT signaling; Phosphatidylinositol signaling | 1425514_at               | Pik3r1   | phosphatidylinositol 3-kinase, regulatory subunit, polypeptide 1 (p85 alpha) | M60651           | P |
|                                         | Jak-STAT signaling                                 | 1455899_x_at             | Socs3    | suppressor of cytokine signaling 3                                           | BB241535         | P |

|                                            |                                         |                                              |            |                                                                              |                                      |           |
|--------------------------------------------|-----------------------------------------|----------------------------------------------|------------|------------------------------------------------------------------------------|--------------------------------------|-----------|
|                                            | Jak-STAT signaling                      | 1450034_at                                   | Stat1      | signal transducer and activator of transcription 1                           | AW214029                             | P         |
|                                            | MAPK signaling                          | 1448135_at                                   | Atf4       | activating transcription factor 4                                            | M94087                               | P         |
|                                            | MAPK signaling                          | 1448830_at                                   | Dusp1      | dual specificity phosphatase 1                                               | NM_013642                            | P         |
|                                            | MAPK signaling                          | 1426677_at                                   | Flna       | filamin, alpha                                                               | BM233746                             | P         |
|                                            | MAPK signaling                          | 1426750_at                                   | Flnb       | filamin, beta                                                                | AW538200                             | P         |
|                                            | MAPK signaling                          | 1454157_a_at                                 | Pla2g2d    | phospholipase A2, group IID                                                  | AK004232                             | P         |
|                                            | MAPK signaling; Wnt signaling           | 1438808_at                                   | Trp53      | transformation related protein 53                                            | BB450072                             | P         |
|                                            | Wnt signaling                           | 1420811_a_at<br>1430533_a_at<br>1450008_a_at | Ctnnb1     | catenin (cadherin associated protein), beta 1, 88kDa                         | NM_007614,<br>BI134907,<br>NM_007614 | P         |
|                                            | Wnt signaling; Notch signaling          | 1448616_at                                   | Dvl2       | dishevelled 2, dsh homolog (Drosophila)                                      | BF466091                             | P         |
| <b>Signaling Molecules and Interaction</b> | Cell adhesion molecules (CAMs)          | 1422527_at                                   | H2-DMa     | histocompatibility 2, class II, locus DMa                                    | NM_010386                            | R         |
|                                            | Cell adhesion molecules (CAMs)          | 1420842_at                                   | Ptpnf      | protein tyrosine phosphatase, receptor type, F                               | BF235516                             | R         |
|                                            | Cell adhesion molecules (CAMs)          | 1424456_at                                   | Pvrl2      | poliovirus receptor-related 2                                                | BC009088                             | R         |
|                                            | Cytokine-cytokine receptor interaction  | 1418910_at                                   | Bmp7       | bone morphogenetic protein 7                                                 | NM_007557                            | R         |
|                                            | Cytokine-cytokine receptor interaction  | 1419455_at                                   | Il10rb     | interleukin 10 receptor, beta                                                | NM_008349                            | R         |
|                                            | Cytokine-cytokine receptor interaction  | 1418572_x_at                                 | Tnfrsf12a  | tumor necrosis factor receptor superfamily, member 12a                       | NM_013749                            | R         |
|                                            | ECM-receptor interaction                | 1422977_at                                   | Gp1bb      | glycoprotein Ib, beta polypeptide                                            | NM_010327                            | R         |
|                                            | Neuroactive ligand-receptor interaction | 1449245_at                                   | Grin2c     | glutamate receptor, ionotropic, NMDA2C (epsilon 3)                           | NM_010350                            | R         |
|                                            | Neuroactive ligand-receptor interaction | 1450795_at                                   | Lhb        | lutinizing hormone beta                                                      | NM_008497                            | R         |
|                                            | Cytokine-cytokine receptor interaction  | 1419529_at                                   | Il23a      | interleukin 23, alpha subunit p19                                            | NM_031252                            | P         |
|                                            | Cytokine-cytokine receptor interaction  | 1452843_at                                   | Il6st      | interleukin 6 signal transducer                                              | AK017211                             | P         |
|                                            | Cytokine-cytokine receptor interaction  | 1451959_a_at                                 | Vegfa      | vascular endothelial growth factor A                                         | U50279                               | P         |
|                                            | <b>Cell Motility</b>                    | Regulation of actin cytoskeleton             | 1448346_at | Cfl1                                                                         | cofilin 1, non-muscle                | NM_007687 |
| Regulation of actin cytoskeleton           |                                         | 1430295_at                                   | Gna13      | guanine nucleotide binding protein, alpha 13                                 | BG094302                             | R         |
| Regulation of actin cytoskeleton           |                                         | 1450389_s_at                                 | Pip5k1a    | phosphatidylinositol-4-phosphate 5-kinase, type 1 alpha                      | NM_008846                            | R         |
| Regulation of actin cytoskeleton           |                                         | 1418448_at                                   | Rras       | Harvey rat sarcoma oncogene, subgroup R                                      | NM_009101                            | R         |
| Regulation of actin cytoskeleton           |                                         | 1418545_at                                   | Wasf1      | WASP family 1                                                                | NM_031877                            | R         |
| Regulation of actin cytoskeleton           |                                         | 1417379_at,<br>1417380_at                    | Iqgap1     | IQ motif containing GTPase activating protein 1                              | NM_016721                            | P         |
| Regulation of actin cytoskeleton           |                                         | 1425514_at                                   | Pik3r1     | phosphatidylinositol 3-kinase, regulatory subunit, polypeptide 1 (p85 alpha) | M60651                               | P         |

|                              |                                                                 |                                          |           |                                                                                |                                |   |
|------------------------------|-----------------------------------------------------------------|------------------------------------------|-----------|--------------------------------------------------------------------------------|--------------------------------|---|
| <b>Cell Growth and Death</b> | Apoptosis                                                       | 1434325_x_at                             | Prkar1b   | protein kinase, cAMP dependent regulatory, type I beta                         | BB274009                       | R |
|                              | Cell cycle                                                      | 1456293_s_at                             | Ccnh      | cyclin H                                                                       | AA068868                       | R |
|                              | Cell cycle                                                      | 1449080_at                               | Hdac2     | histone deacetylase 2                                                          | NM_008229                      | R |
|                              | Cell cycle                                                      | 1418225_at, 1418226_at                   | Orc2l     | origin recognition complex, subunit 2-like (S. cerevisiae)                     | BB830976                       | R |
|                              | Apoptosis                                                       | 1421229_at                               | Dffb      | DNA fragmentation factor, beta subunit                                         | NM_007859                      | P |
|                              | Apoptosis                                                       | 1425514_at                               | Pik3r1    | phosphatidylinositol 3-kinase, regulatory subunit, polypeptide 1 (p85 alpha)   | M60651                         | P |
|                              | Cell cycle; Apoptosis                                           | 1438808_at                               | Trp53     | transformation related protein 53                                              | BB450072                       | P |
|                              | Cell cycle                                                      | 1417131_at                               | Cdc25a    | cell division cycle 25 homolog A (S. cerevisiae)                               | C76119                         | P |
|                              | Cell cycle                                                      | 1417019_a_at                             | Cdc6      | cell division cycle 6 homolog (S. cerevisiae)                                  | NM_011799                      | P |
|                              | Cell cycle                                                      | 1426002_a_at                             | Cdc7      | cell division cycle 7 (S. cerevisiae)                                          | AB018574                       | P |
|                              | Cell cycle                                                      | 1426653_at                               | Mcm3      | minichromosome maintenance deficient 3 (S. cerevisiae)                         | BI658327                       | P |
|                              | Cell cycle                                                      | 1415945_at                               | Mcm5      | minichromosome maintenance deficient 5, cell division cycle 46 (S. cerevisiae) | NM_008566                      | P |
|                              | Cell cycle                                                      | 1422663_at                               | Orc1l     | origin recognition complex, subunit 1-like (S.cereviaiae)                      | BC015073                       | P |
|                              | Cell cycle                                                      | 1449293_a_at                             | Skp2      | S-phase kinase-associated protein 2 (p45)                                      | AV259620                       | P |
| <b>Cell Communication</b>    | Adherens junction                                               | 1420842_at                               | Ptpfr     | protein tyrosine phosphatase, receptor type, F                                 | BF235516                       | R |
|                              | Adherens junction                                               | 1424456_at                               | Pvrl2     | poliovirus receptor-related 2                                                  | BC009088                       | R |
|                              | Adherens junction; Focal adhesion; Gap junction; Tight junction | 1423240_at                               | Src       | Rous sarcoma oncogene                                                          | BG868120                       | R |
|                              | Adherens junction                                               | 1418545_at                               | Wasf1     | WASP family 1                                                                  | NM_031877                      | R |
|                              | Focal adhesion                                                  | 1434396_a_at                             | LOC433297 |                                                                                | AU017189                       | R |
|                              | Focal adhesion; Tight junction                                  | 1424269_a_at, 1435041_at                 | Myl6      | myosin, light polypeptide 6, alkali, smooth muscle and non-muscle              | BC026760, BI108818             | R |
|                              | Focal adhesion; Gap junction; Tight junction                    | 1418448_at                               | Rras      | Harvey rat sarcoma oncogene, subgroup R                                        | NM_009101                      | R |
|                              | Gap junction; Tight junction                                    | 1435652_a_at                             | Gnai2     | guanine nucleotide binding protein, alpha inhibiting 2                         | BF228116                       | R |
|                              | Tight junction                                                  | 1451012_a_at                             | Csda      | cold shock domain protein A                                                    | AV216648                       | R |
|                              | Tight junction                                                  | 1424894_at                               | Rab13     | RAB13, member RAS oncogene family                                              | BC027214                       | R |
|                              | Adherens junction; Focal adhesion; Tight junction               | 1420811_a_at, 1430533_a_at, 1450008_a_at | Ctnnb1    | catenin (cadherin associated protein), beta 1, 88kDa                           | NM_007614, BI134907, NM_007614 | P |
|                              | Adherens junction                                               | 1417379_at, 1417380_at                   | Iqgap1    | IQ motif containing GTPase activating protein 1                                | NM_016721                      | P |
|                              | Focal adhesion                                                  | 1426677_at                               | Flna      | filamin, alpha                                                                 | BM233746                       | P |
|                              | Focal adhesion                                                  | 1426750_at                               | Flnb      | filamin, beta                                                                  | AW538200                       | P |

|                                                                                    |                                            |                                                      |              |                                                                              |                                                                              |           |
|------------------------------------------------------------------------------------|--------------------------------------------|------------------------------------------------------|--------------|------------------------------------------------------------------------------|------------------------------------------------------------------------------|-----------|
|                                                                                    | Focal adhesion                             | 1425514_at                                           | Pik3r1       | phosphatidylinositol 3-kinase, regulatory subunit, polypeptide 1 (p85 alpha) | M60651                                                                       | P         |
|                                                                                    | Focal adhesion                             | 1451959_a_at                                         | Vegfa        | vascular endothelial growth factor A                                         | U50279                                                                       | P         |
|                                                                                    | Gap junction                               | 1417279_at, 1460203_at                               | Itpr1        | inositol 1,4,5-triphosphate receptor 1                                       | NM_010585                                                                    | P         |
|                                                                                    | Tight junction                             | 1421064_at                                           | Mpp5         | membrane protein, palmitoylated 5 (MAGUK p55 subfamily member 5)             | AW258373                                                                     | P         |
|                                                                                    | Tight junction                             | 1422685_at                                           | Sec81        | SEC8-like 1 (S. cerevisiae)                                                  | NM_009148                                                                    | P         |
|                                                                                    | Tight junction                             | 1427888_a_at                                         | Spna2        | spectrin alpha 2                                                             | AK011566                                                                     | P         |
|                                                                                    | Tight junction                             | 1452143_at                                           | Spnb2        | spectrin beta 2                                                              | BQ174069                                                                     | P         |
| <b>Endocrine System</b>                                                            | Adipocytokine signaling                    | 1421266_s_at                                         | Nfkbib       | nuclear factor of kappa light chain gene enhancer in B-cells inhibitor, beta | NM_010908                                                                    | R         |
|                                                                                    | Insulin signaling                          | 1434976_x_at                                         | Eif4ebp1     | eukaryotic translation initiation factor 4E binding protein 1                | AV216412                                                                     | R         |
|                                                                                    | Insulin signaling                          | 1423828_at                                           | Fasn         | fatty acid synthase                                                          | AF127033                                                                     | R         |
|                                                                                    | Insulin signaling                          | 1418300_a_at, 1449029_at                             | Mknk2        | MAP kinase-interacting serine/threonine kinase2                              | NM_021462                                                                    | R         |
|                                                                                    | Insulin signaling                          | 1434325_x_at                                         | Prkar1b      | protein kinase, cAMP dependent regulatory, type I beta                       | BB274009                                                                     | R         |
|                                                                                    | Insulin signaling                          | 1420842_at                                           | Ptpnf        | protein tyrosine phosphatase, receptor type, F                               | BF235516                                                                     | R         |
|                                                                                    | Insulin signaling                          | 1416636_at                                           | Rheb         | RAS-homolog enriched in brain                                                | NM_053075                                                                    | R         |
|                                                                                    | Insulin signaling                          | 1418448_at                                           | Rras         | Harvey rat sarcoma oncogene, subgroup R                                      | NM_009101                                                                    | R         |
|                                                                                    | Adipocytokine signaling                    | 1451828_a_at                                         | Acsl4        | acyl-CoA synthetase long-chain family member 4                               | AB033886                                                                     | P         |
|                                                                                    | Adipocytokine signaling                    | 1460409_at                                           | Cpt1a        | carnitine palmitoyltransferase 1a, liver                                     | AI987925                                                                     | P         |
|                                                                                    | Adipocytokine signaling; Insulin signaling | 1417592_at                                           | Frap1        | FK506 binding protein 12-rapamycin associated protein 1                      | NM_020009                                                                    | P         |
|                                                                                    | Adipocytokine signaling; Insulin signaling | 1422248_at                                           | Irs4         | insulin receptor substrate 4                                                 | NM_010572                                                                    | P         |
|                                                                                    | Adipocytokine signaling                    | 1433804_at                                           | Jak1         | Janus kinase 1                                                               | BQ032637                                                                     | P         |
|                                                                                    | Adipocytokine signaling; Insulin signaling | 1455899_x_at                                         | Socs3        | suppressor of cytokine signaling 3                                           | BB241535                                                                     | P         |
|                                                                                    | Insulin signaling                          | 1425514_at                                           | Pik3r1       | phosphatidylinositol 3-kinase, regulatory subunit, polypeptide 1 (p85 alpha) | M60651                                                                       | P         |
|                                                                                    | <b>Immune System</b>                       | B cell receptor signaling; T cell receptor signaling | 1421266_s_at | Nfkbib                                                                       | nuclear factor of kappa light chain gene enhancer in B-cells inhibitor, beta | NM_010908 |
| B cell receptor signaling; T cell receptor signaling                               |                                            | 1418448_at                                           | Rras         | Harvey rat sarcoma oncogene, subgroup R                                      | NM_009101                                                                    | R         |
| Hematopoietic cell lineage                                                         |                                            | 1422977_at                                           | Gp1bb        | glycoprotein Ib, beta polypeptide                                            | NM_010327                                                                    | R         |
| B cell receptor signaling; T cell receptor signaling; Toll-like receptor signaling |                                            | 1425514_at                                           | Pik3r1       | phosphatidylinositol 3-kinase, regulatory subunit, polypeptide 1 (p85 alpha) | M60651                                                                       | P         |



|                                    |                                                                                                                   |                          |          |                                                    |                     |   |
|------------------------------------|-------------------------------------------------------------------------------------------------------------------|--------------------------|----------|----------------------------------------------------|---------------------|---|
|                                    | Hematopoietic cell lineage                                                                                        | 1422967_a_at             | Tfrc     | transferrin receptor                               | BB810450            | P |
|                                    | Toll-like receptor signaling                                                                                      | 1450034_at               | Stat1    | signal transducer and activator of transcription 1 | AW214029            | P |
| <b>Development</b>                 | Dorso-ventral axis formation                                                                                      | 1418448_at               | Rras     | Harvey rat sarcoma oncogene, subgroup R            | NM_009101           | M |
| <b>Behavior</b>                    | Circadian rhythm                                                                                                  | 1418025_at               | Bhlhb2   | basic helix-loop-helix domain containing, class B2 | NM_011498           | P |
| <b>Neurodegenerative Disorders</b> | Alzheimer's disease                                                                                               | 1416673_at               | Bace2    | beta-site APP-cleaving enzyme 2                    | NM_019517           | R |
|                                    | Alzheimer's disease; Dentatorubropallidolusian atrophy (DRPLA); Huntington's disease; Neurodegenerative Disorders | 1418625_s_at             | LOC14433 |                                                    | NM_008084           | R |
|                                    | Amyotrophic lateral sclerosis (ALS)                                                                               | 1422520_at               | Nef3     | neurofilament 3, medium                            | NM_008691           | R |
|                                    | Neurodegenerative Disorders; Prion disease                                                                        | 1416134_at, 1435857_s_at | Aplp1    | amyloid beta (A4) precursor-like protein 1         | NM_007467, A1848048 | R |
|                                    | Parkinson's disease                                                                                               | 1452357_at               | Sept5    | septin 5                                           | AF033350            | R |
|                                    | Amyotrophic lateral sclerosis (ALS); Huntington's disease                                                         | 1438808_at               | Trp53    | transformation related protein 53                  | BB450072            | P |
|                                    | Huntington's disease                                                                                              | 1454626_at               | Cltc     | clathrin, heavy polypeptide (Hc)                   | BM211219            | P |
|                                    | Parkinson's disease                                                                                               | 1448116_at               | Ube1x    | ubiquitin-activating enzyme E1, Chr X              | NM_009457           | P |

<sup>a</sup> Movement into the RNP pool (R) or polysome pool (P)
