# Supplementary material
Source: PubMed Central journal article supplement (PMC4042833)

# Figure S1

**A**

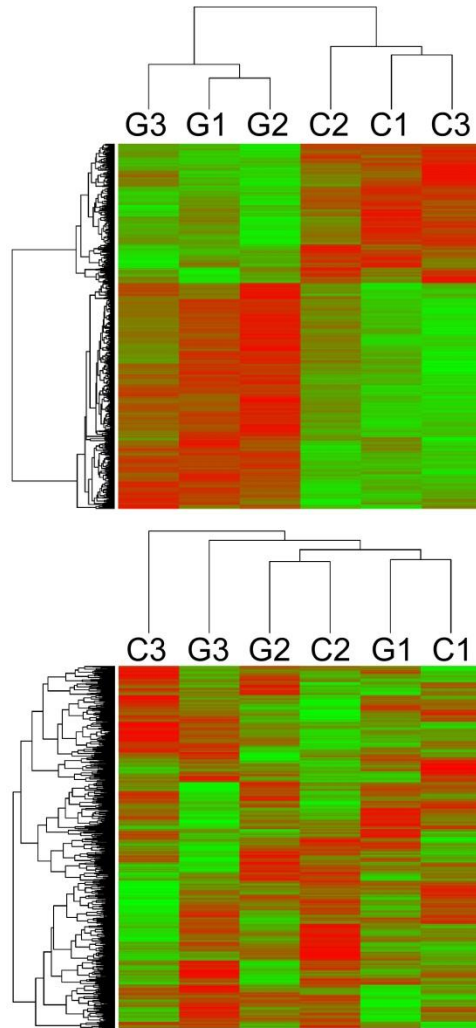

**B**

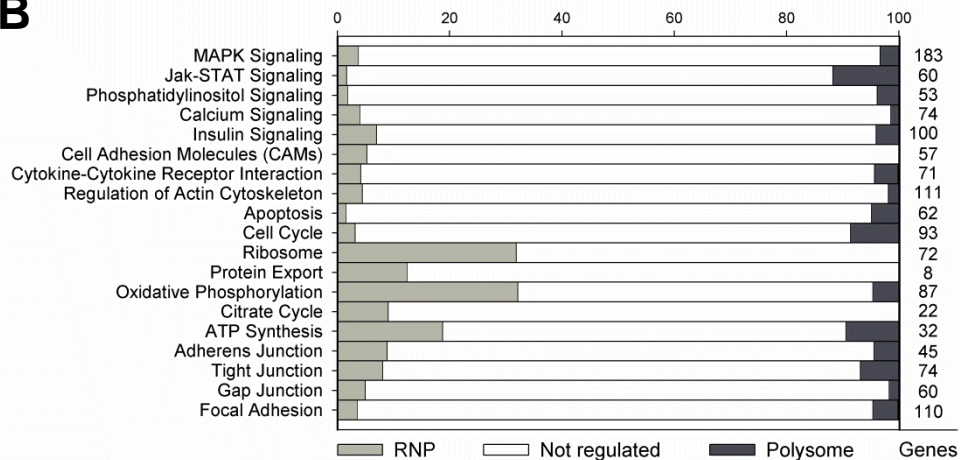

Supplement: NIHMS542100-supplement-02.pdf [file NIHMS542100-supplement-02.pdf]
